# Supplementary material
Source: PubMed Central journal article supplement (PMC5728326)

**Table S1.** The proteins and the technologies used to measure their level in blood plasma.

| Protein                         | Gene Name | UniProt | Peptide                 | SIS (fmol/uL) |
|---------------------------------|-----------|---------|-------------------------|---------------|
| Alpha-2-antiplasmin             | SERPINF2  | P08697  | DFLQSLK                 | 312.97        |
| Alpha-2-antiplasmin             | SERPINF2  | P08697  | LGNQEPGGQTALK           | 95.21         |
| Alpha-2-macroglobulin           | A2M       | P01023  | AIGYLNTGYQR             | 481.75        |
| Alpha-2-macroglobulin           | A2M       | P01023  | LLIYAVLPTGDVIGDSAK      | 505.65        |
| Alpha-2-macroglobulin           | A2M       | P01023  | TEHPFTVEEFVLPK          | 494.20        |
| Antithrombin                    | SERPINC1  | P01008  | DDLVSDAFHK              | 466.75        |
| Antithrombin                    | SERPINC1  | P01008  | FATTFYQHLADSK           | 422.52        |
| Antithrombin                    | SERPINC1  | P01008  | TSDQIHFFFAK             | 456.89        |
| Beta-2-glycoprotein 1           | APOH      | P02749  | ATVVYQGER               | 479.76        |
| C4b-binding protein alpha chain | C4BPA     | P04003  | EDVYVVGTVLR             | 425.72        |
| C4b-binding protein alpha chain | C4BPA     | P04003  | GYILVGQAK               | 420.45        |
| C4b-binding protein alpha chain | C4BPA     | P04003  | LNNGEITQHR              | 356.00        |
| Carboxypeptidase B2             | CPB2      | Q96IY4  | DHEELSLVASEAVR          | 371.11        |
| Carboxypeptidase B2             | CPB2      | Q96IY4  | IHIGSSFEEK              | 510.40        |
| Carboxypeptidase B2             | CPB2      | Q96IY4  | YSFTIELR                | 1344.21       |
| Coagulation factor IX           | F9        | P00740  | IIPHHNYNAINK            | 405.97        |
| Coagulation factor IX           | F9        | P00740  | SALVLQYLR               | 485.22        |
| Coagulation factor IX           | F9        | P00740  | VSVSQTSK                | 292.80        |
| Coagulation factor V            | F5        | P12259  | AEVDDVIQVR              | 419.10        |
| Coagulation factor V            | F5        | P12259  | GEYEEHLGILGPIIR         | 564.34        |
| Coagulation factor V            | F5        | P12259  | SQHLDNFSNQIGK           | 417.94        |
| Coagulation factor VII          | F7        | P08709  | VAQVIIPSTYVPGTTNHDIALLR | 506.54        |
| Coagulation factor X            | F10       | P00742  | ETYDFDIAVLR             | 304.18        |
| Coagulation factor X            | F10       | P00742  | GYTLADNGK               | 351.84        |
| Coagulation factor X            | F10       | P00742  | TGIVSGFGR               | 469.73        |
| Coagulation factor XI           | F11       | P03951  | EDTSFFGVQEIIHDQYK       | 333.15        |
| Coagulation factor XI           | F11       | P03951  | TSESGLPSTR              | 297.99        |
| Coagulation factor XI           | F11       | P03951  | VYSGILNQSEIK            | 460.21        |
| Coagulation factor XII          | F12       | P00748  | TEQAAVAR                | 622.89        |
| Coagulation factor XII          | F12       | P00748  | VVGGLVALR               | 522.59        |
| Coagulation factor XIII A chain | F13A1     | P00488  | ETFDVTLEPLSFK           | 484.83        |
| Coagulation factor XIII A chain | F13A1     | P00488  | GVNLQEFNLNVTSVHLFK      | 458.00        |
| Coagulation factor XIII A chain | F13A1     | P00488  | HVYGELDVQIQR            | 376.74        |
| Coagulation factor XIII B chain | F13B      | P05160  | IAQYYTFK                | 387.31        |
| Coagulation factor XIII B chain | F13B      | P05160  | IQTHSTTYR               | 589.57        |
| Coagulation factor XIII B chain | F13B      | P05160  | LIENGYFHPVK             | 486.05        |
| Endothelial protein C receptor  | PROCR     | Q9UNN8  | TLAFPLTIR               | 350.49        |
| Fibrinogen alpha chain          | FGA       | P02671  | ESSSHHPGIAEFPSR         | 573.34        |
| Fibrinogen alpha chain          | FGA       | P02671  | GSESGIFTNTK             | 586.08        |
| Fibrinogen alpha chain          | FGA       | P02671  | VQHIQLLQK               | 474.99        |
| Fibrinogen beta chain           | FGB       | P02675  | AHYGGFTVQNEANK          | 467.83        |
| Fibrinogen beta chain           | FGB       | P02675  | HQLYIDETVNSNIPTNLR      | 513.25        |
| Fibrinogen beta chain           | FGB       | P02675  | YQISVNK                 | 523.84        |
| Fibrinogen gamma chain          | FGG       | P02679  | IHLISTQSAIPYALR         | 384.42        |

|                                         |           |        |                    |         |
|-----------------------------------------|-----------|--------|--------------------|---------|
| Fibrinogen gamma chain                  | FGG       | P02679 | YEASILTHDSSIR      | 444.94  |
| Fibrinogen gamma chain                  | FGG       | P02679 | YLQEIYNSNNQK       | 1082.69 |
| Heparin cofactor 2                      | SERPIND1  | P05546 | NYNLVESLK          | 548.65  |
| Heparin cofactor 2                      | SERPIND1  | P05546 | SVNDLYIQK          | 534.94  |
| Heparin cofactor 2                      | SERPIND1  | P05546 | TLEAQLTPR          | 485.51  |
| Histidine-rich glycoprotein             | HRG       | P04196 | ADLFYDVEALDLESPK   | 519.28  |
| Histidine-rich glycoprotein             | HRG       | P04196 | DGYLFQLLR          | 211.32  |
| Histidine-rich glycoprotein             | HRG       | P04196 | GGEGTGYFVDFSVR     | 625.94  |
| Kininogen-1                             | KNG1      | P01042 | DIPTNSPELEETLHTITK | 762.28  |
| Kininogen-1                             | KNG1      | P01042 | TVGSDFYFSFK        | 614.53  |
| Plasma protease C1 inhibitor            | SERPING1  | P05155 | FQPTLLTLP          | 473.64  |
| Plasma protease C1 inhibitor            | SERPING1  | P05155 | GVTSVSQIFHSPDLAIR  | 450.12  |
| Plasma protease C1 inhibitor            | SERPING1  | P05155 | LLDSLPSDTR         | 456.35  |
| Plasma serine protease inhibitor        | SERPINA5  | P05154 | AVVEVDESCTR        | 463.84  |
| Plasma serine protease inhibitor        | SERPINA5  | P05154 | FSIEGSYQLEK        | 663.06  |
| Plasma serine protease inhibitor        | SERPINA5  | P05154 | GFOQLLQELNQPR      | 420.83  |
| Plasminogen                             | PLG       | P00747 | LFLEPTR            | 353.34  |
| Protein Z-dependent protease inhibitor  | SERPINA10 | Q9UK55 | ETSNFGFSLLR        | 559.15  |
| Protein Z-dependent protease inhibitor  | SERPINA10 | Q9UK55 | LFDEINPETK         | 339.78  |
| Protein Z-dependent protease inhibitor  | SERPINA10 | Q9UK55 | LILVDYILFK         | 403.07  |
| Prothrombin                             | F2        | P00734 | ELLESYIDGR         | 159.14  |
| Prothrombin                             | F2        | P00734 | ETAASLLQAGYK       | 666.94  |
| Prothrombin                             | F2        | P00734 | TATSEYQTFNPR       | 752.62  |
| Vitamin K-dependent protein C           | PROC      | P04070 | DTEDQEDQVDPR       | 559.87  |
| Vitamin K-dependent protein C           | PROC      | P04070 | LGEYDLR            | 550.20  |
| Vitamin K-dependent protein C           | PROC      | P04070 | TFVLNFIK           | 402.68  |
| Vitamin K-dependent protein S           | PROS1     | P07225 | IETISHEDLQR        | 399.74  |
| Vitamin K-dependent protein S           | PROS1     | P07225 | SFQTGLFTAAR        | 551.55  |
| Vitamin K-dependent protein S           | PROS1     | P07225 | VYFAGFPR           | 573.24  |
| Vitamin K-dependent protein Z           | PROZ      | P22891 | APDLQDLPWQVK       | 560.00  |
| Vitamin K-dependent protein Z           | PROZ      | P22891 | DFAEHLIPR          | 368.73  |
| Vitamin K-dependent protein Z           | PROZ      | P22891 | GLLSGWAR           | 700.00  |
| Vitamin K-dependent protein Z variant 1 | PROZ      | B0YJC6 | ENFVLTTAK          | 468.06  |
| von Willebrand Factor                   | VWF       | P04275 | HIVTFDQGNFK        | 467.44  |
| von Willebrand Factor                   | VWF       | P04275 | ILAGPAGDSNVVK      | 454.68  |

**Table S2.** An overview of failed MRM measurements and the corresponding proteins and peptides.

| Protein                                 | UniProtKB<br>Accession | Antibody assay | Activity assay | LC-MRM/MS assay |
|-----------------------------------------|------------------------|----------------|----------------|-----------------|
| Alpha-2-antiplasmin                     | P08697                 |                | X              | X               |
| Antithrombin                            | P01008                 |                | X              | X               |
| Coagulation factor IX                   | P00740                 | X              |                | X               |
| Coagulation factor V                    | P12259                 | X              |                | X               |
| Coagulation factor VII                  | P08709                 |                | X              | X               |
| Coagulation factor X                    | P00742                 | X              |                | X               |
| Coagulation factor XI                   | P03951                 | X              |                | X               |
| Fibrinogen alpha chain                  | P02671                 |                | X              | X               |
| Fibrinogen beta chain                   | P02675                 |                | X              | X               |
| Fibrinogen gamma chain                  | P02679                 |                | X              | X               |
| Plasminogen                             | P00747                 |                | X              | X               |
| Prothrombin (FII)                       | P00734                 |                | X              | X               |
| Vitamin K-dependent protein C           | P04070                 |                | X              | X               |
| Vitamin K-dependent protein S           | P07225                 | X              |                | X               |
| von Willebrand Factor                   | P04275                 | X              |                | X               |
| Alpha-2-macroglobulin                   | P01023                 |                |                | X               |
| Beta-2-glycoprotein 1                   | P02749                 |                |                | X               |
| C4b-binding protein alpha chain         | P04003                 |                |                | X               |
| Carboxypeptidase B2                     | Q961Y4                 |                |                | X               |
| Coagulation factor XII                  | P00748                 |                |                | X               |
| Coagulation factor XIII A chain         | P00488                 |                |                | X               |
| Coagulation factor XIII B chain         | P05160                 |                |                | X               |
| Endothelial protein C receptor          | Q9UNN8                 |                |                | X               |
| Heparin cofactor 2                      | P05546                 |                |                | X               |
| Histidine-rich glycoprotein             | P04196                 |                |                | X               |
| Kininogen-1                             | P01042                 |                |                | X               |
| Plasma protease C1 inhibitor            | P05155                 |                |                | X               |
| Plasma serine protease inhibitor        | P05154                 |                |                | X               |
| Protein Z-dependent protease inhibitor  | Q9UK55                 |                |                | X               |
| Vitamin K-dependent protein Z           | P22891                 |                |                | X               |
| Vitamin K-dependent protein Z variant 1 | B0YJC6                 |                |                | X               |

**Table S3.** An overview of the correlations between activity/antibody and MRM assays for the 13 proteins from the coagulation pathway.

| <b>Protein</b>                          | <b>Peptide</b>  | <b>Number of samples without MRM signal</b> |
|-----------------------------------------|-----------------|---------------------------------------------|
| Carboxypeptidase B2                     | IHIGSSF EK      | 69                                          |
| von Willebrand Factor                   | HIVTFDGGQNFK    | 67                                          |
| Carboxypeptidase B2                     | DHEELSLVASEAVR  | 60                                          |
| von Willebrand Factor                   | ILAGPAGDSNVVK   | 32                                          |
| Vitamin K-dependent protein Z variant 1 | ENFVLTTAK       | 28                                          |
| Coagulation factor IX                   | VSVSQTSK        | 17                                          |
| Protein Z-dependent protease inhibitor  | ETSNFGFSLLR     | 17                                          |
| Coagulation factor XIII A chain         | ETFDVTLEPLSFK   | 8                                           |
| Coagulation factor XIII B chain         | IAQYYTFFK       | 8                                           |
| Vitamin K-dependent protein C           | DTEDQEDQVDPR    | 8                                           |
| Prothrombin                             | ETAASLLQAGYK    | 6                                           |
| Vitamin K-dependent protein Z           | GLLSGWAR        | 3                                           |
| Vitamin K-dependent protein Z           | DFAEHLIPR       | 2                                           |
| Coagulation factor V                    | GEYEEHLGILGPIIR | 1                                           |

Figure S1. Hierarchical clustering analysis based on activity and antibody assays alone.

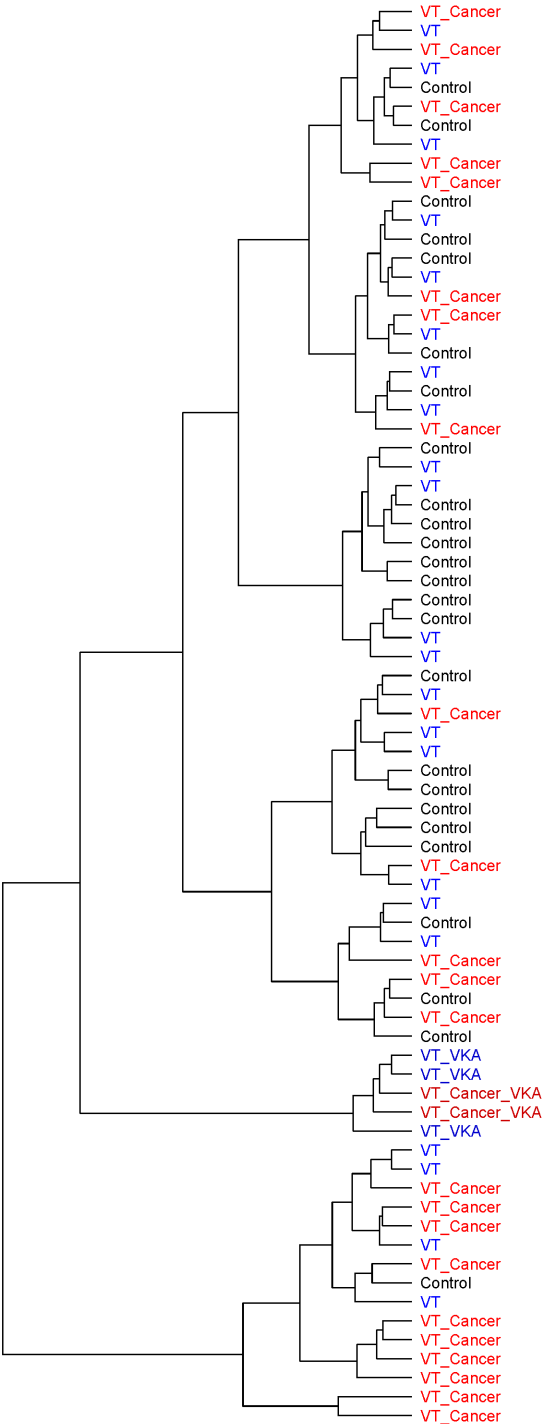

**Figure S2.** Hierarchical clustering analysis based on the MRM measurements of only the 13 protein targets measured in MRM and activity/antibody assays.

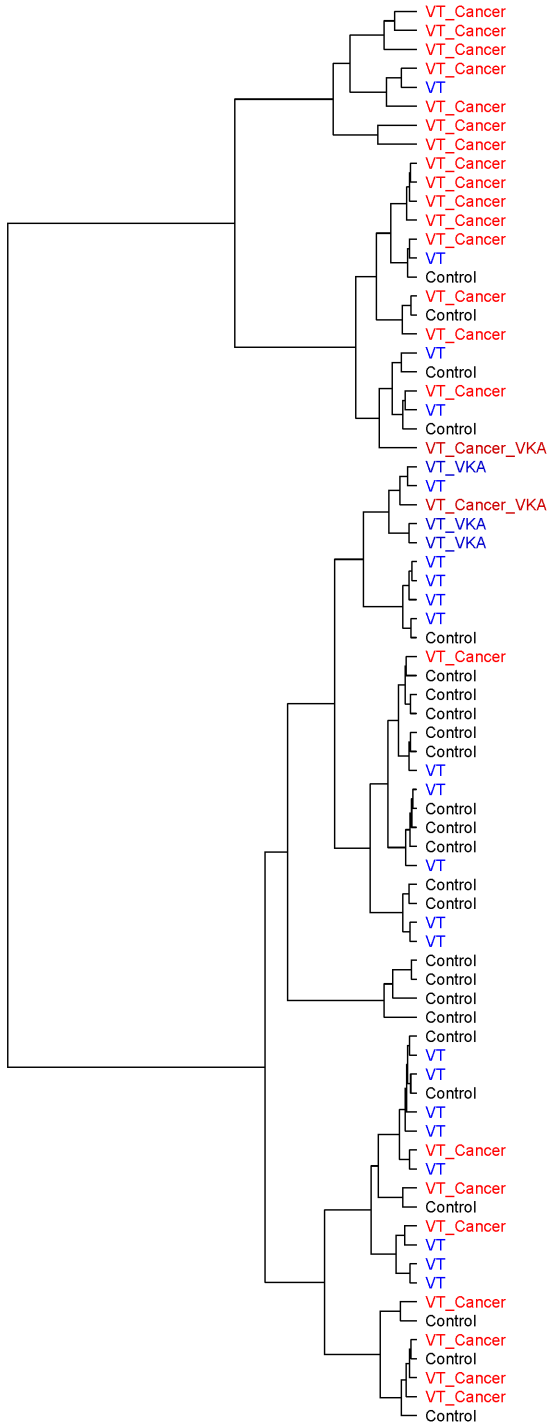

# Alpha-2-antiplasmin

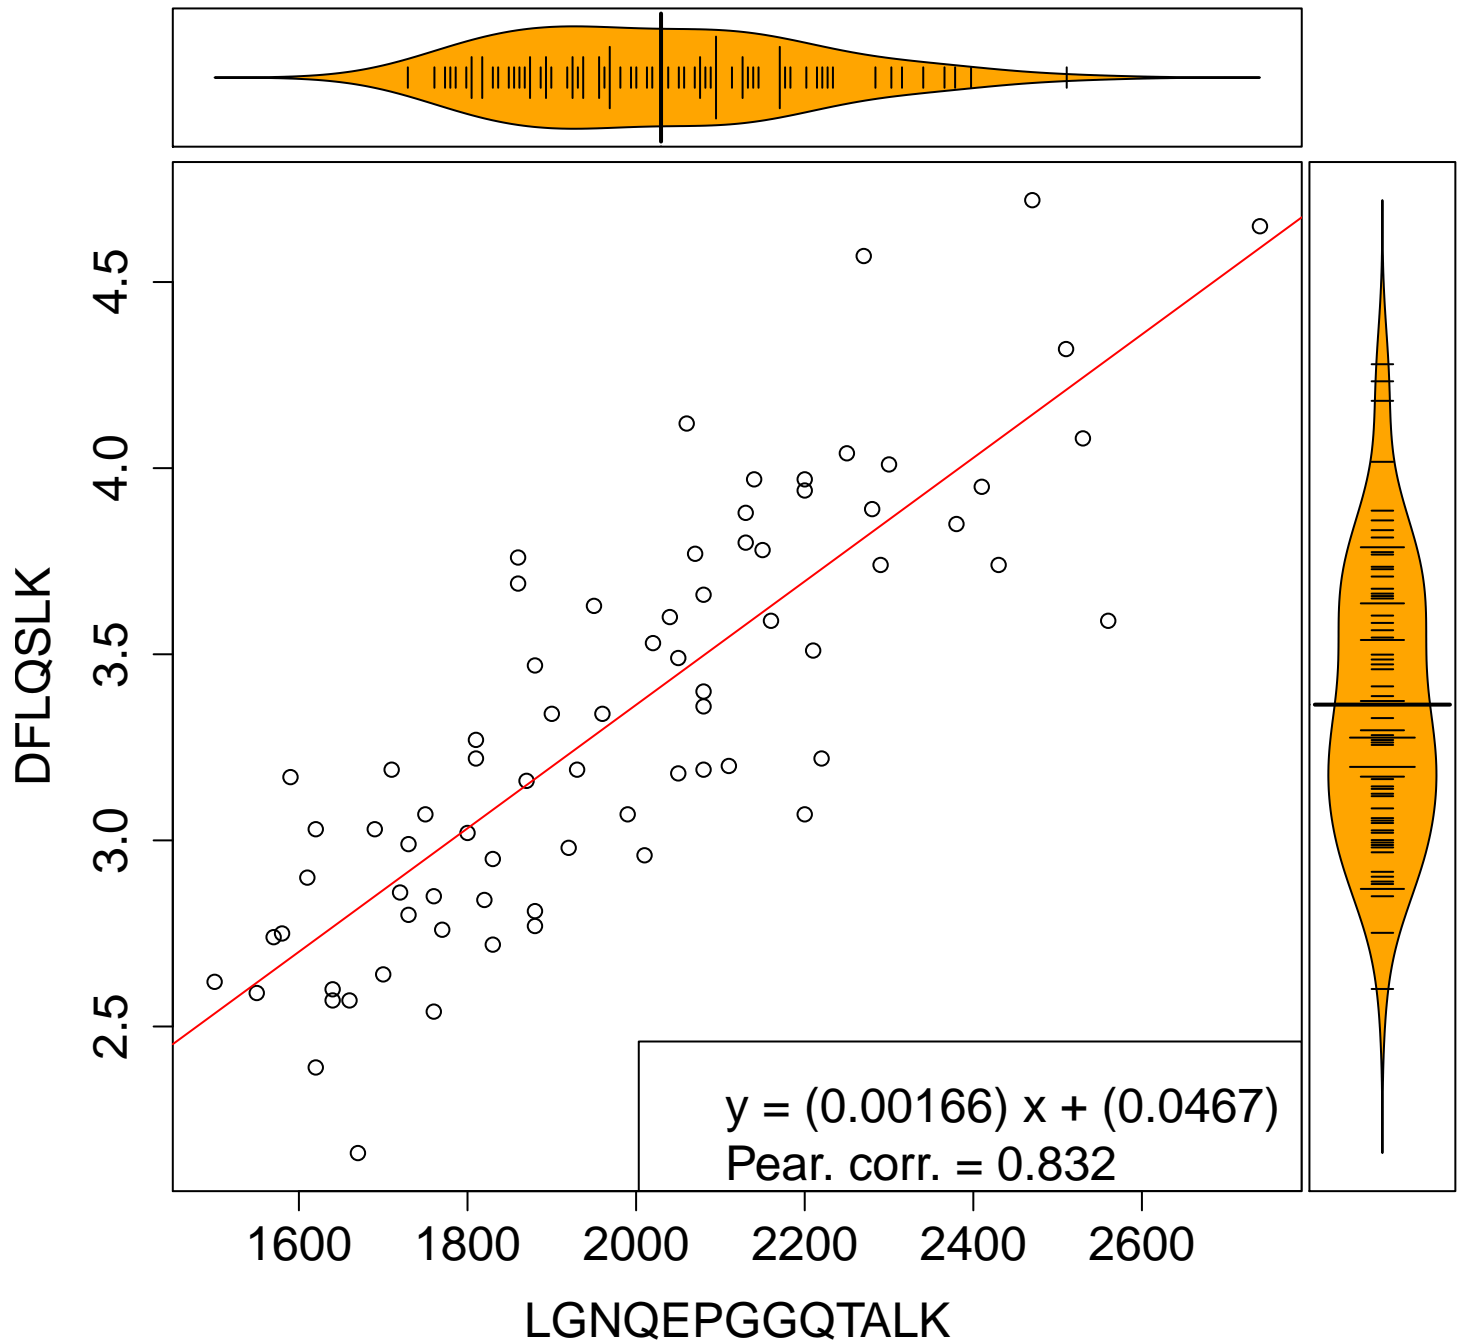

# Alpha-2-macroglobulin

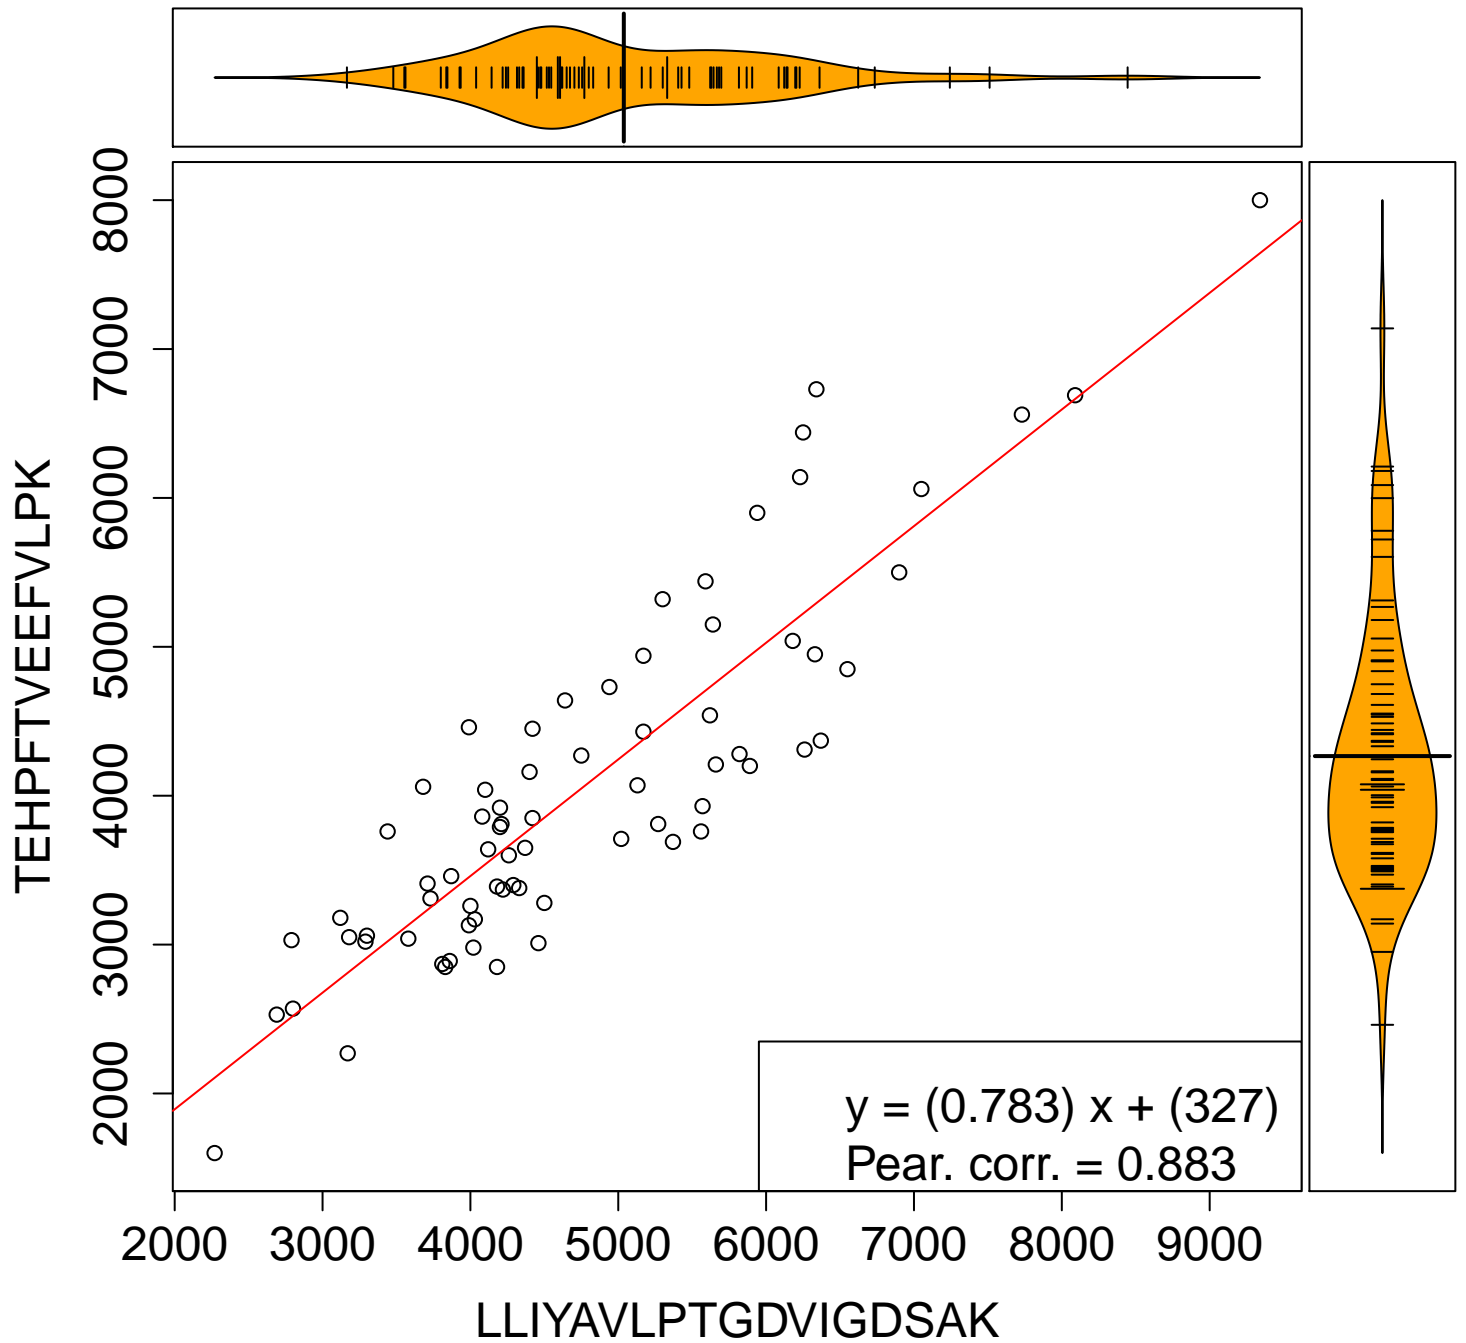



# Alpha-2-macroglobulin

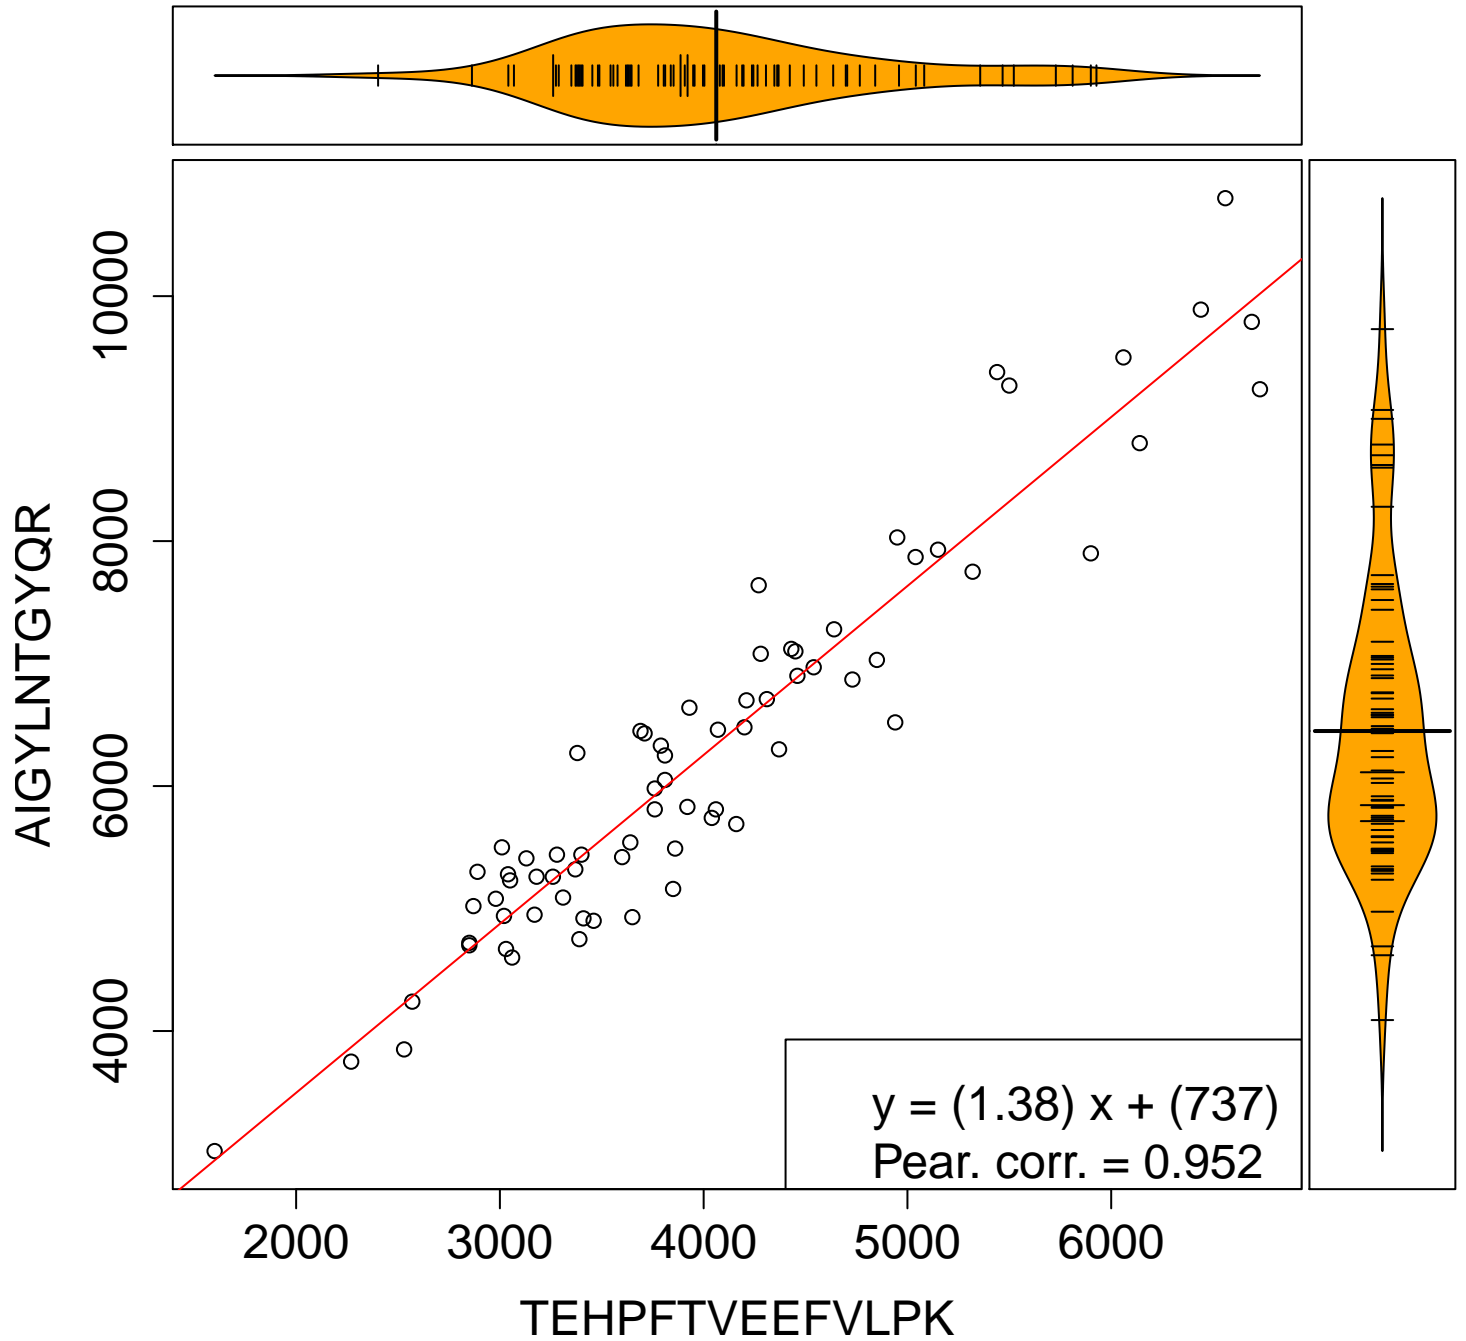

# Antithrombin-III

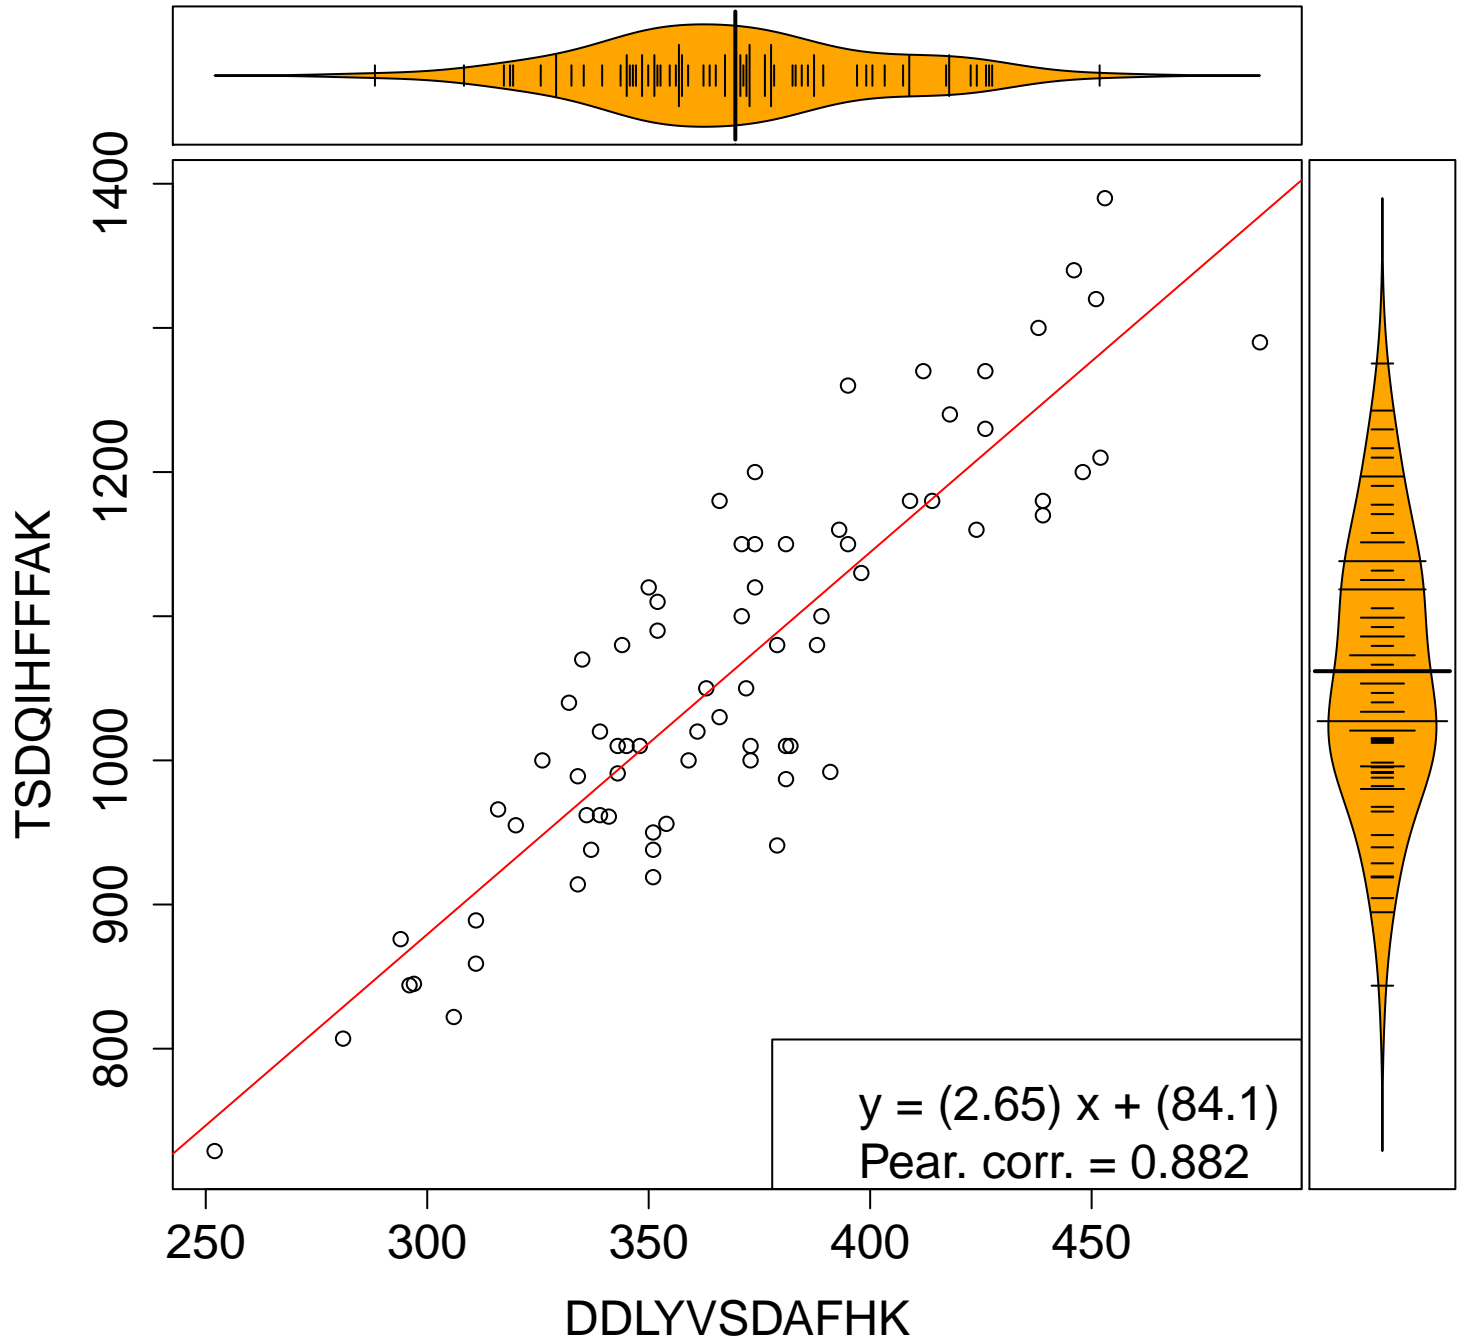

# Antithrombin-III

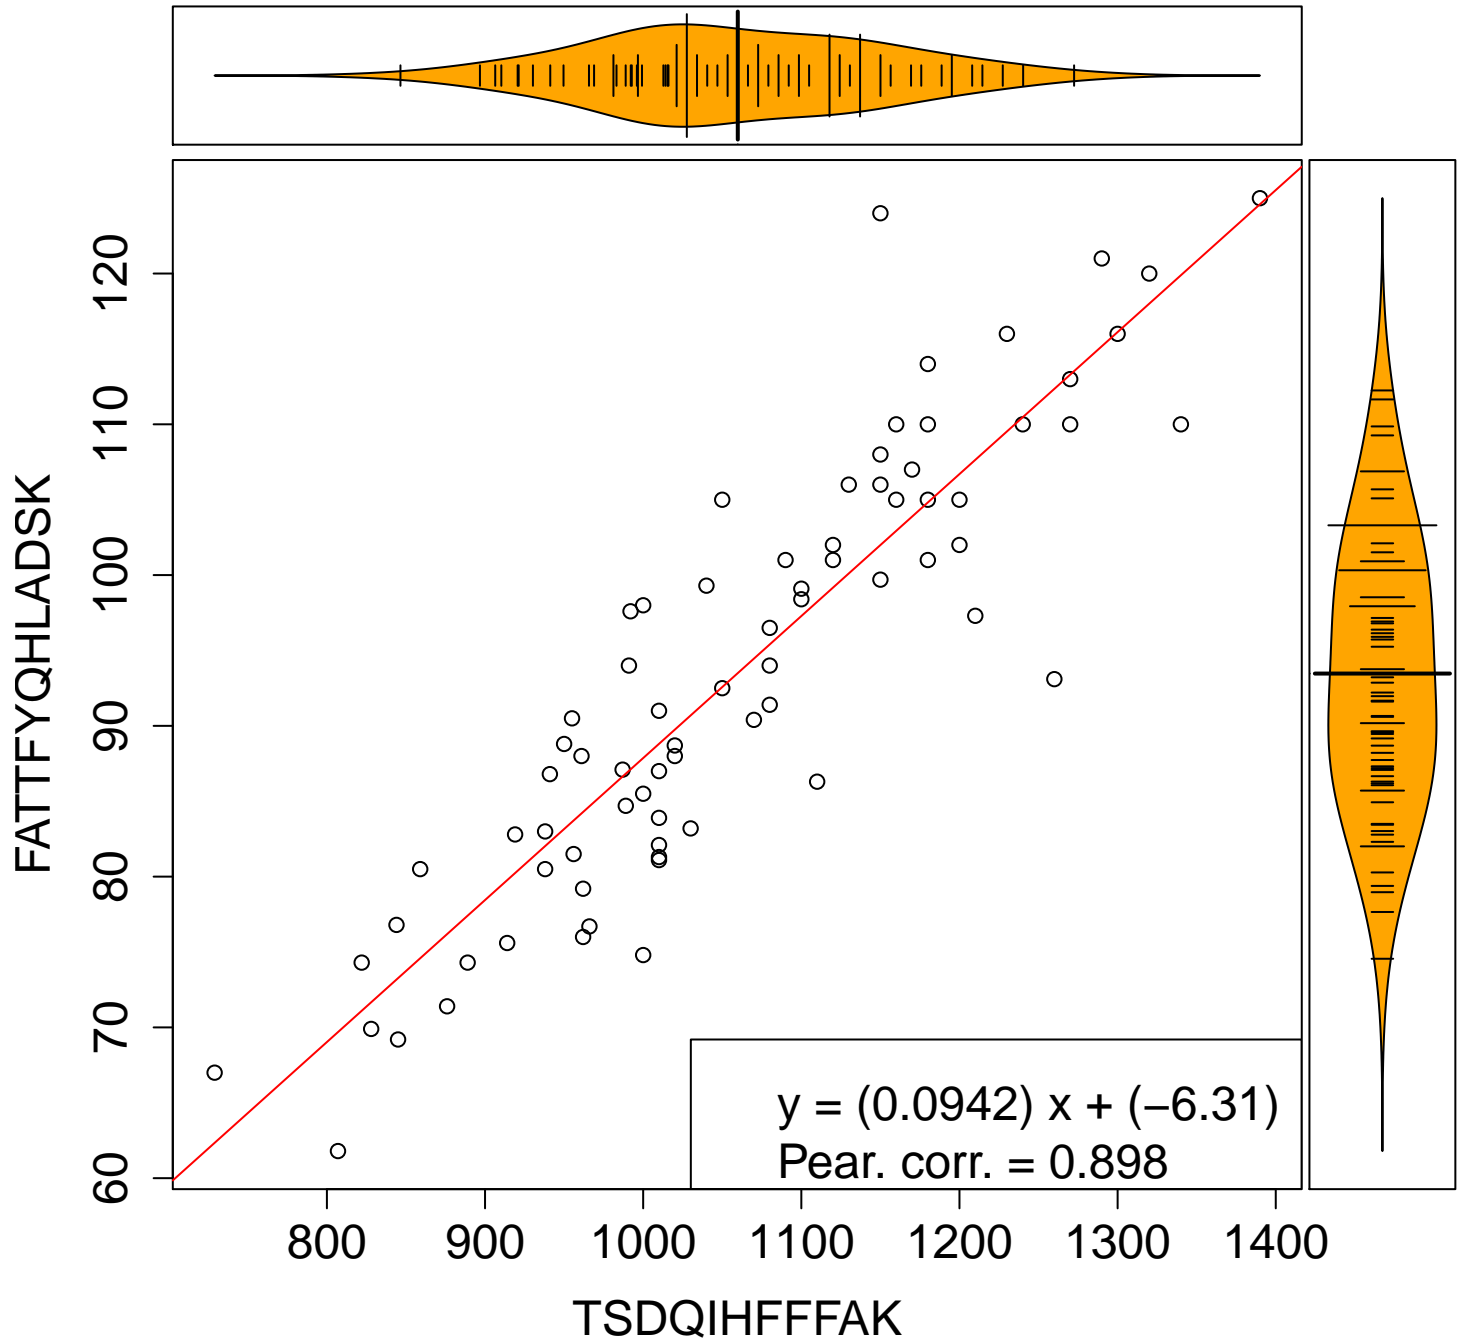

# C4b-binding protein alpha chain

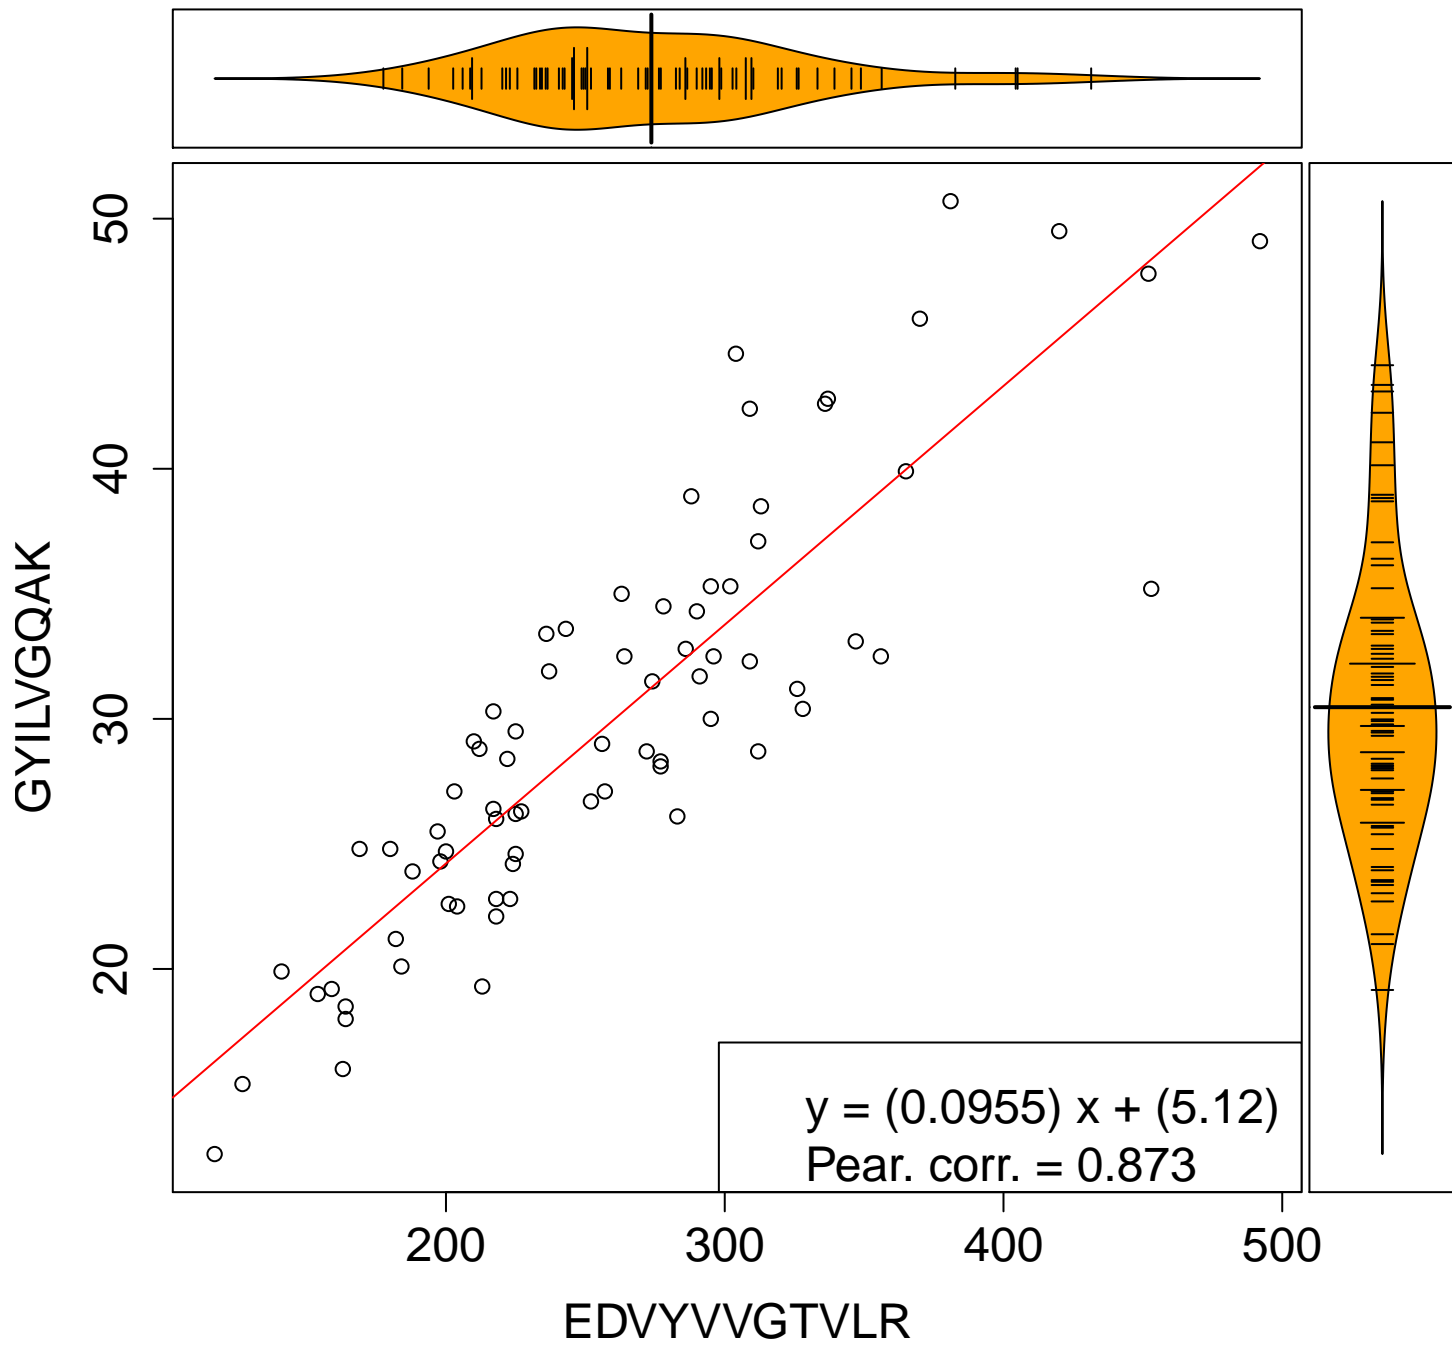

# C4b-binding protein alpha chain

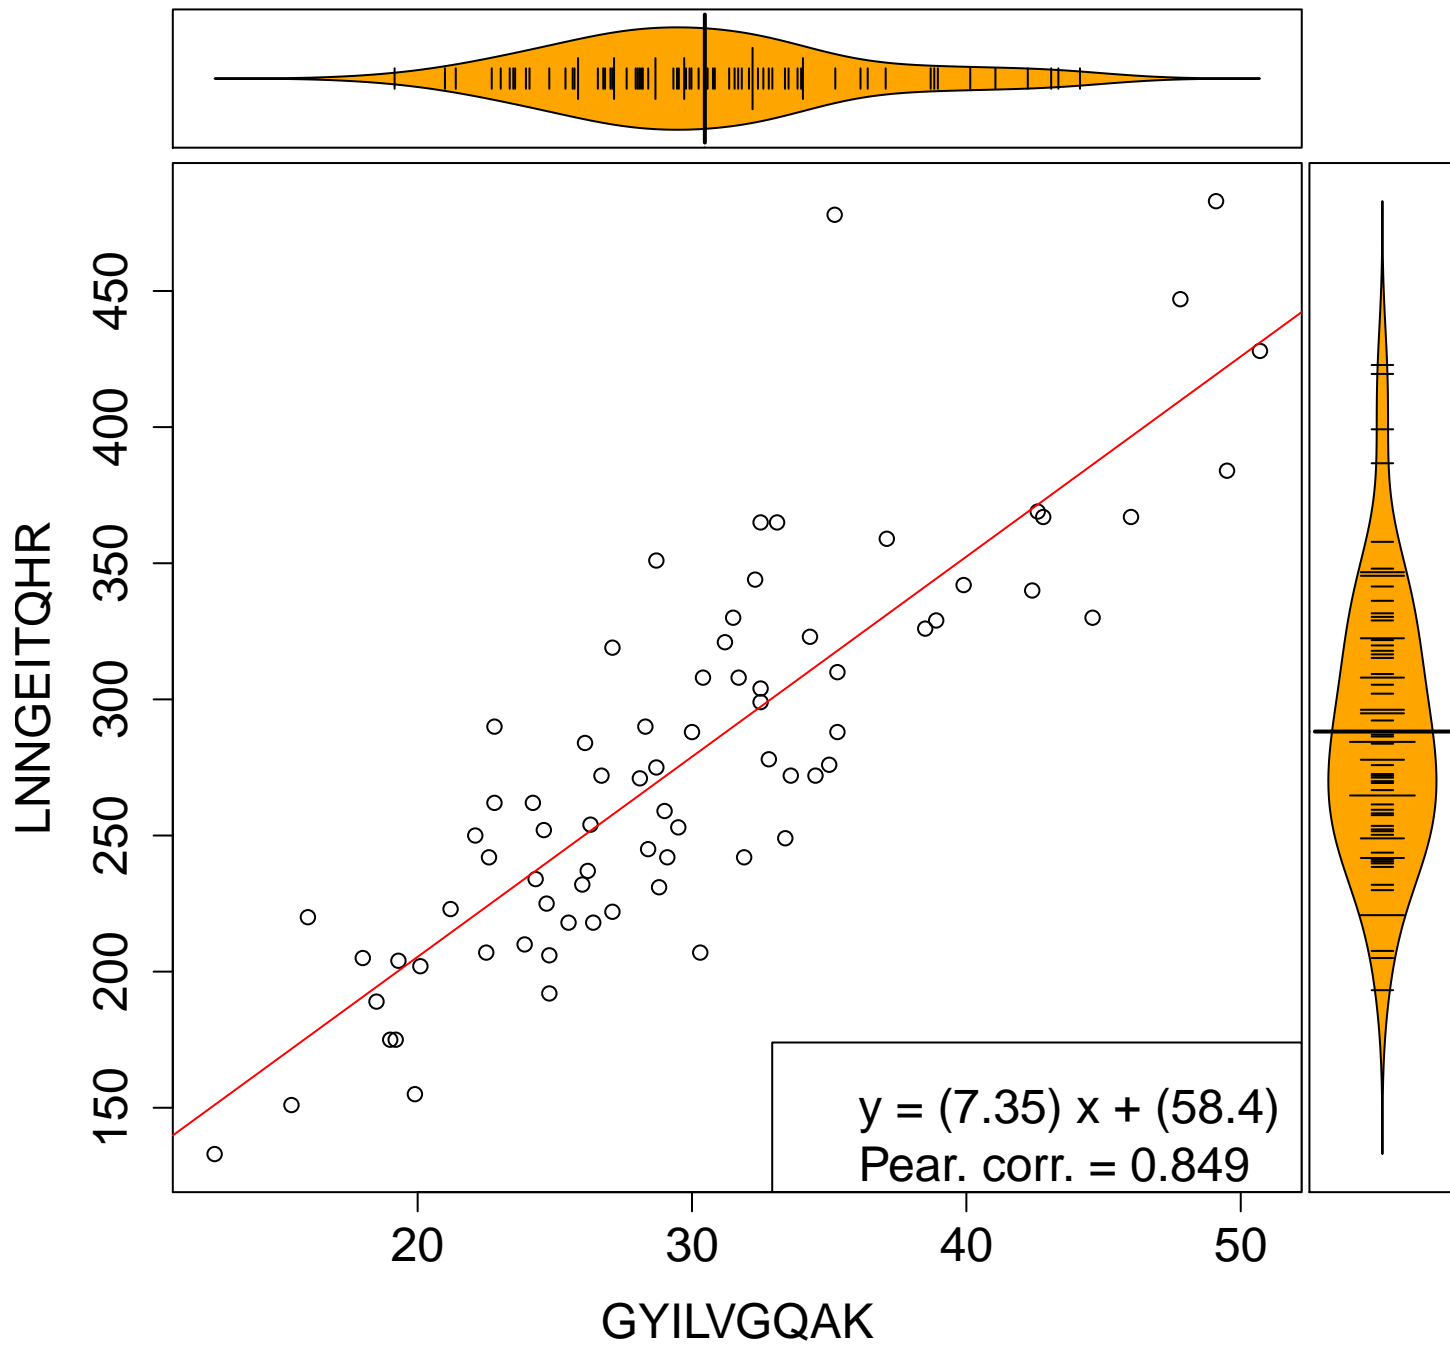

# Vitamin K-dependent protein C

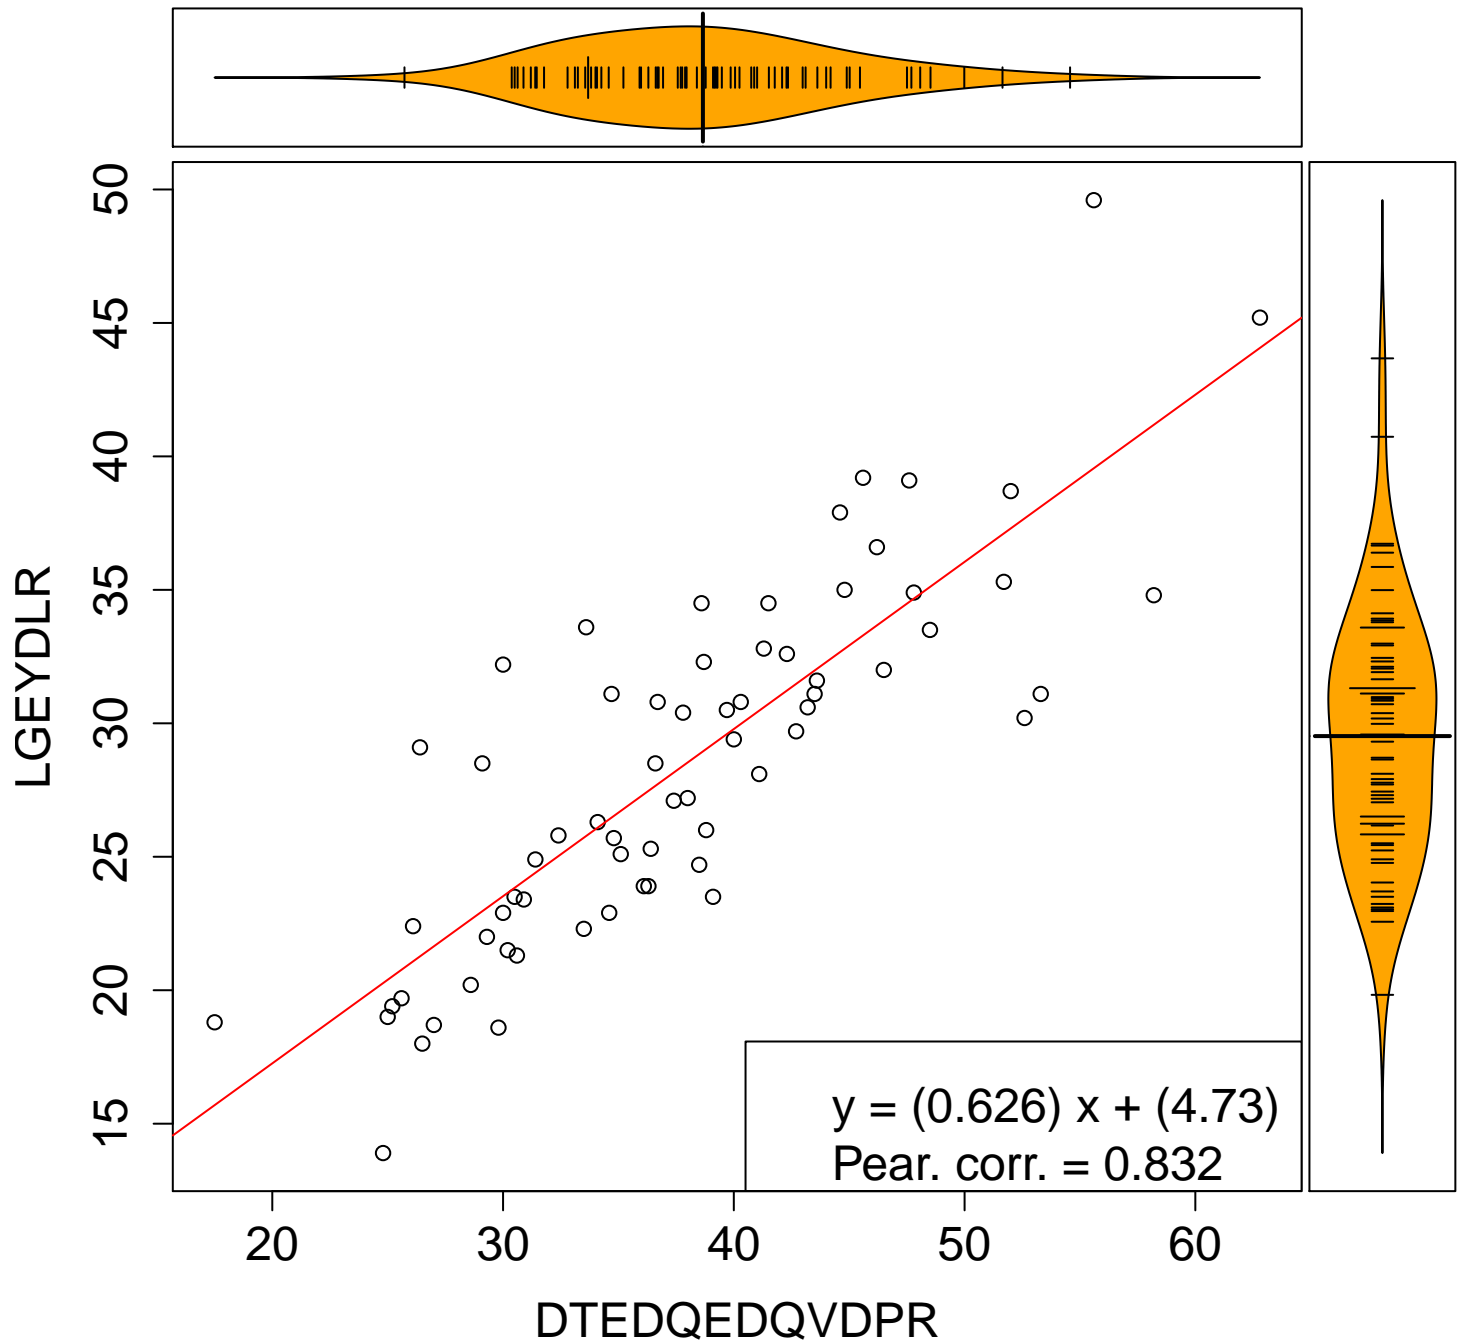

# Vitamin K-dependent protein C

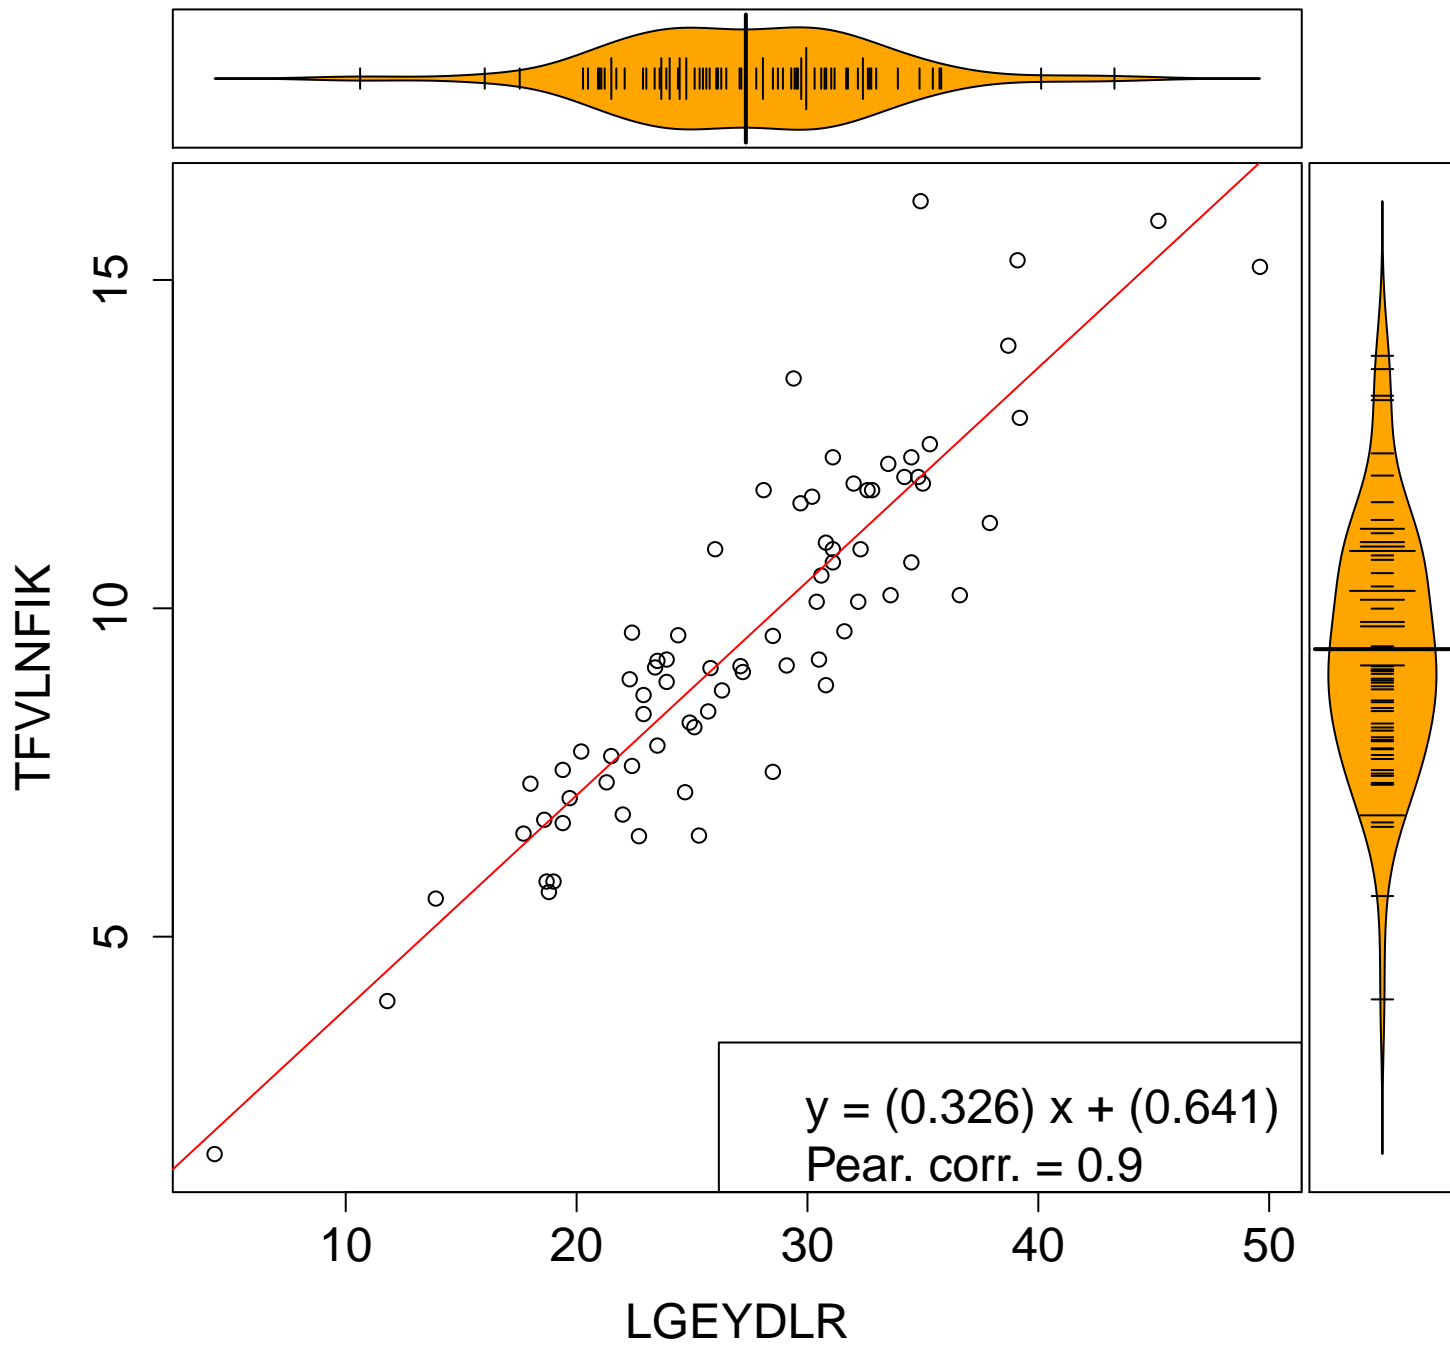

# Coagulation factor V

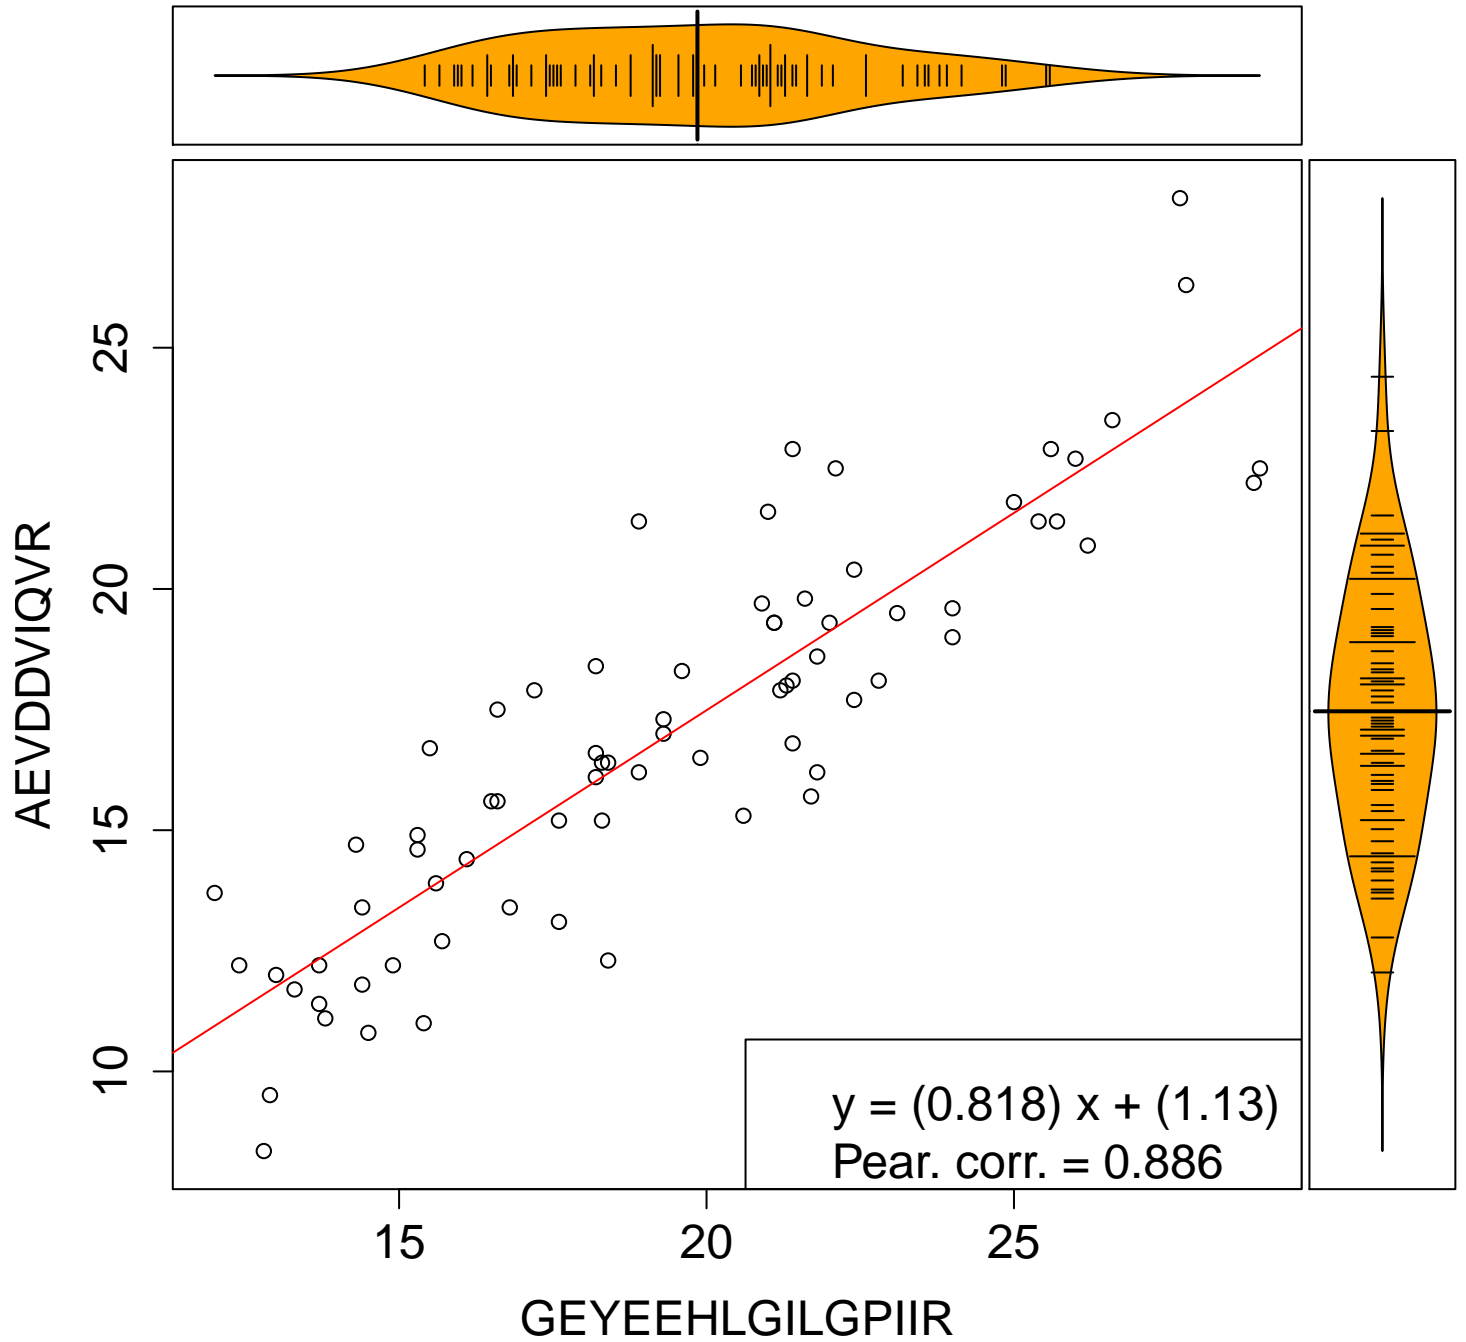



# Coagulation factor V

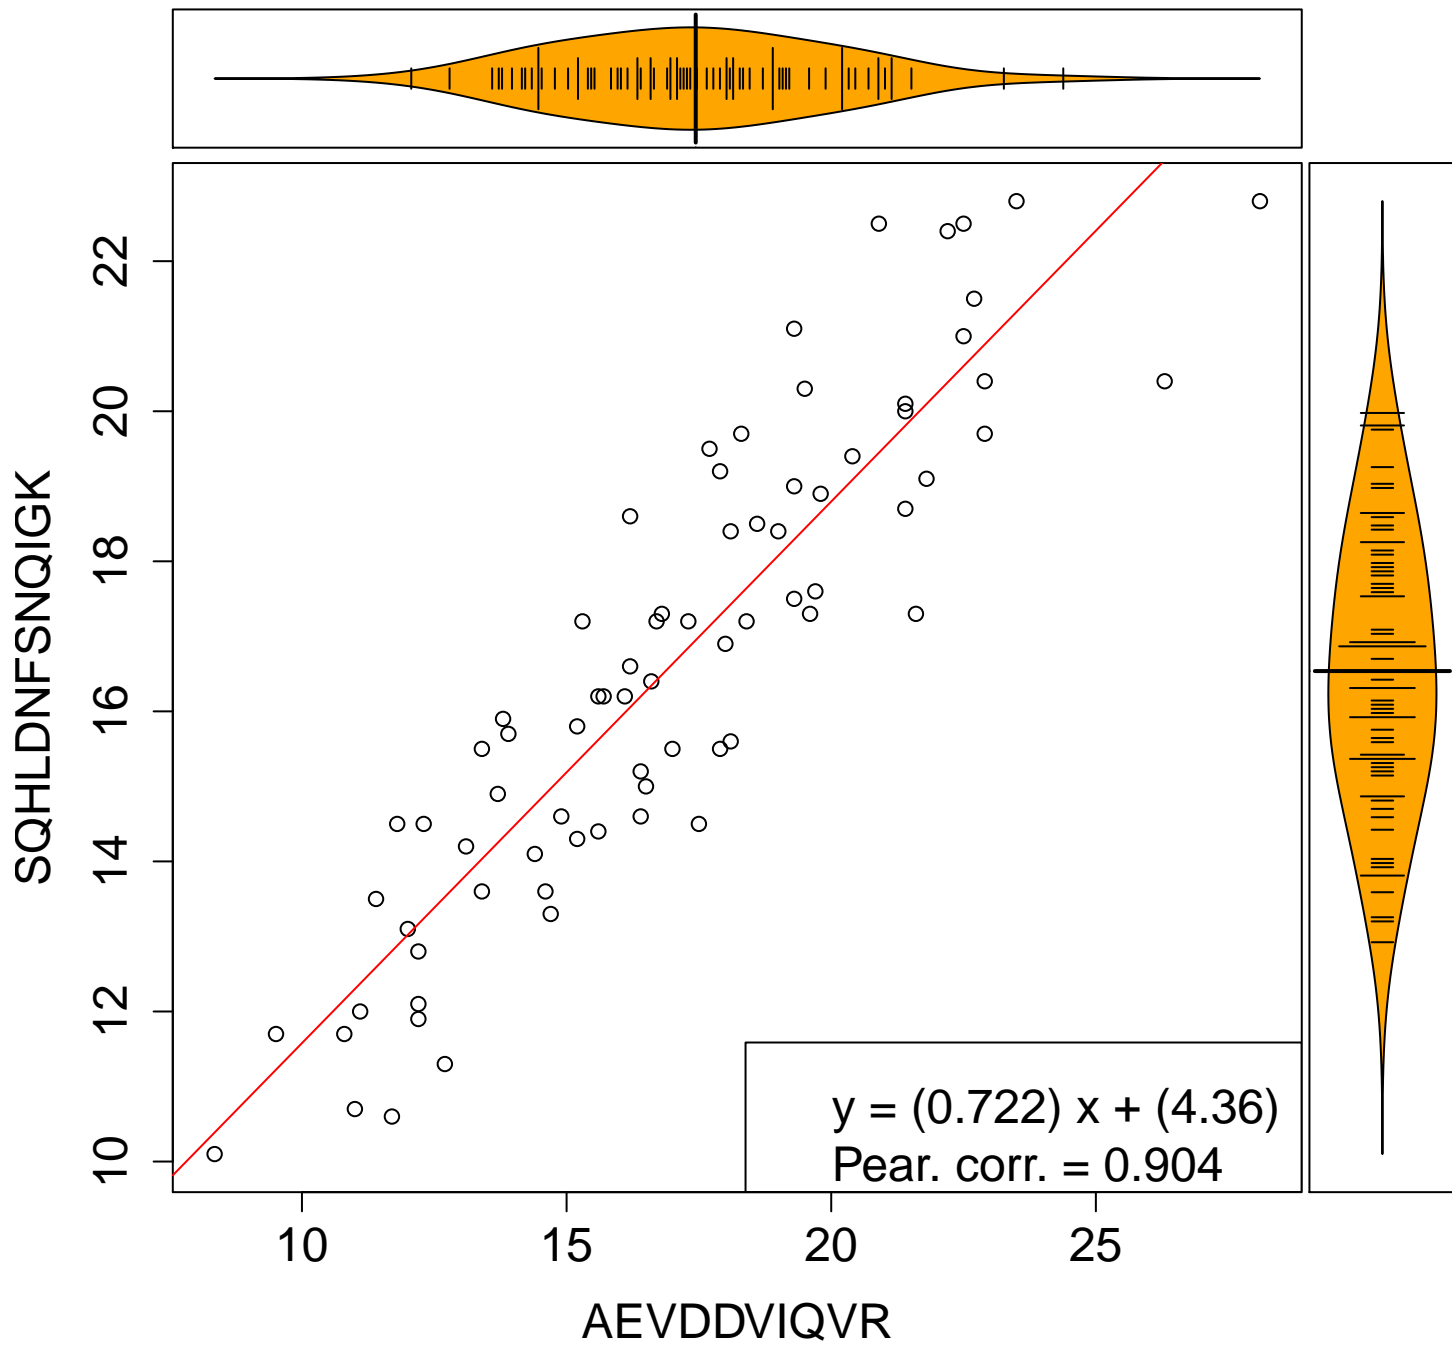

# Coagulation factor XII

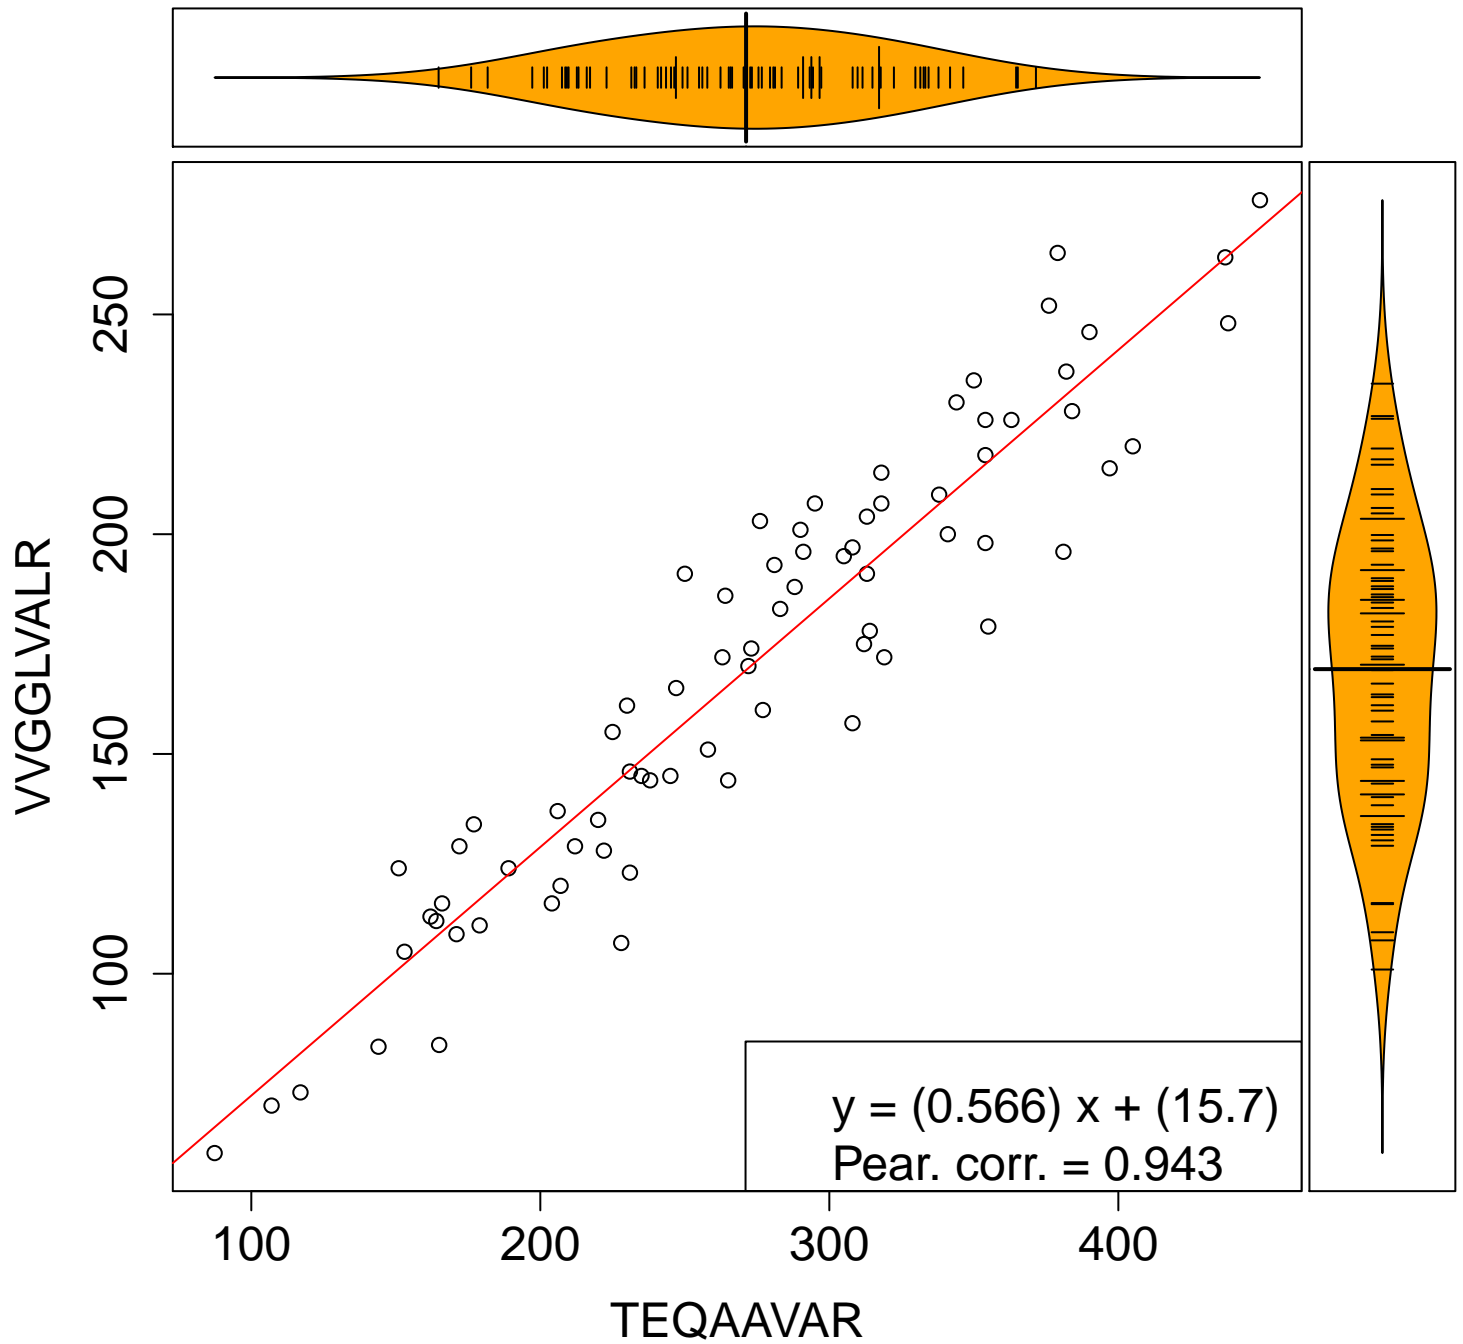

# Coagulation factor XIII A chain

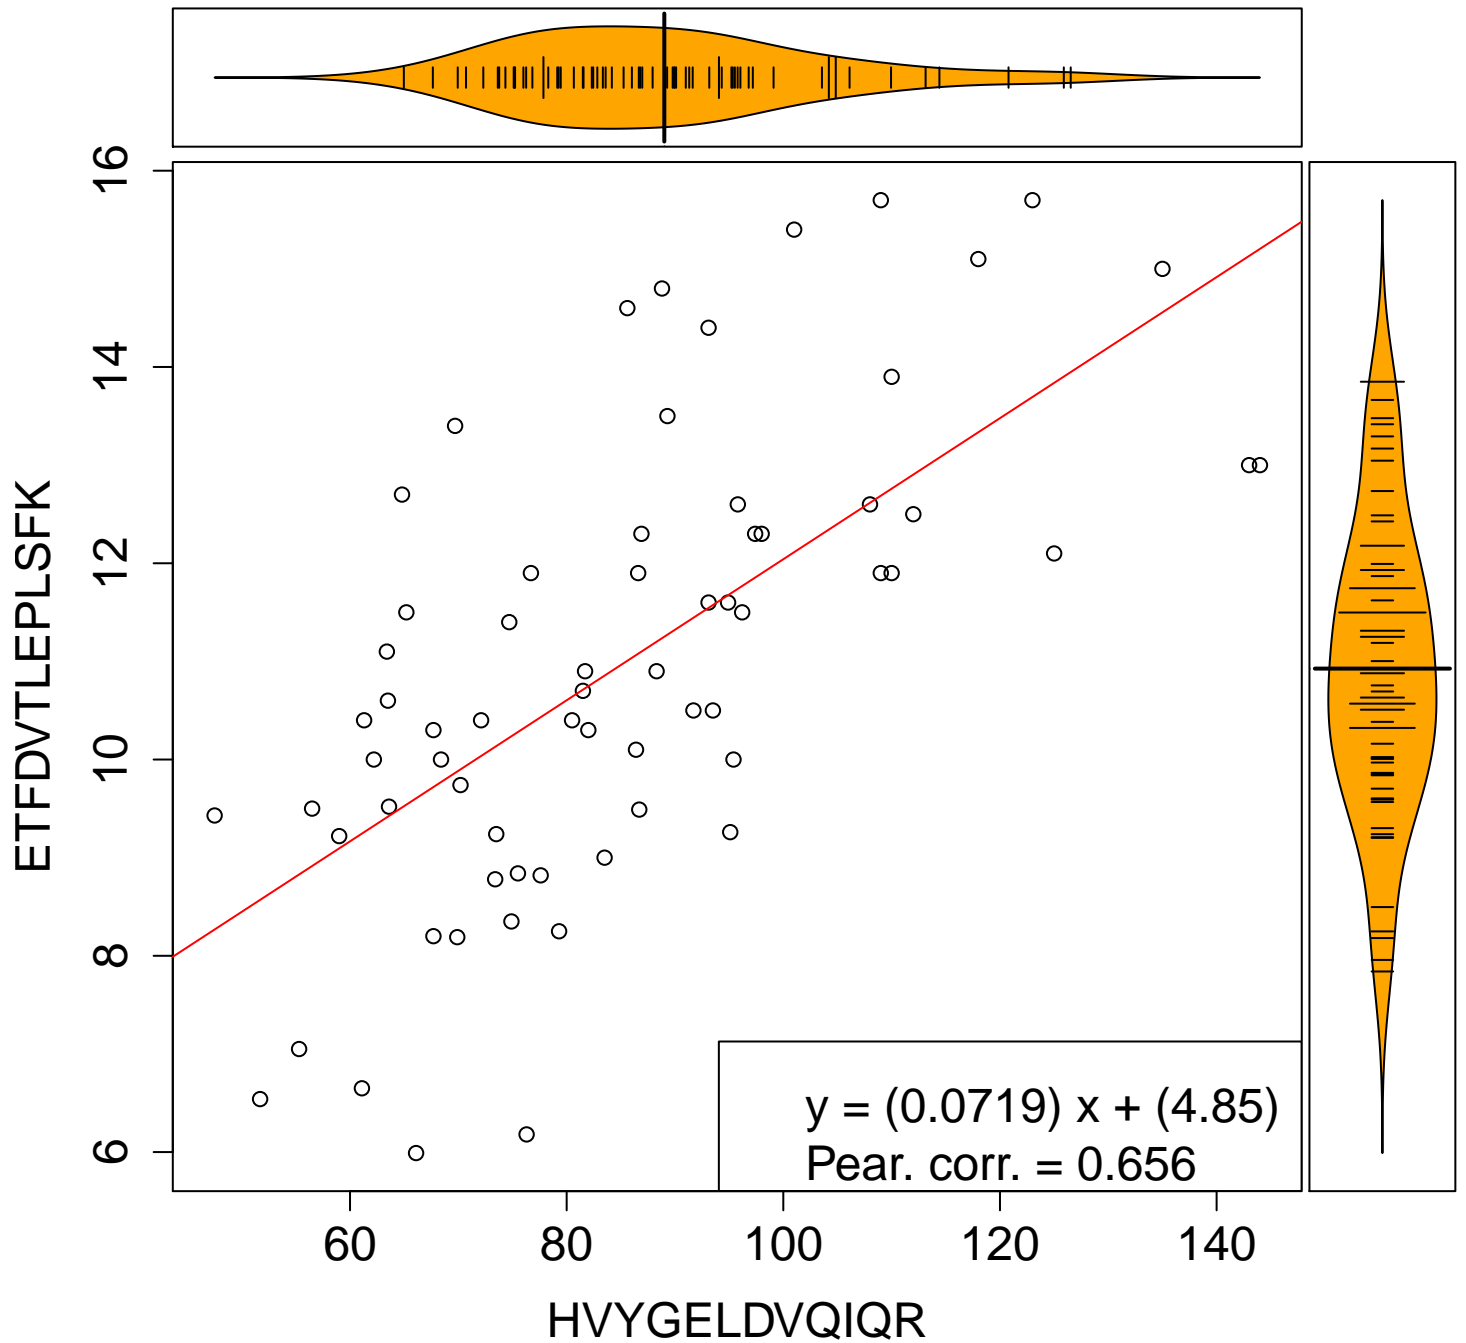

# Coagulation factor XIII A chain

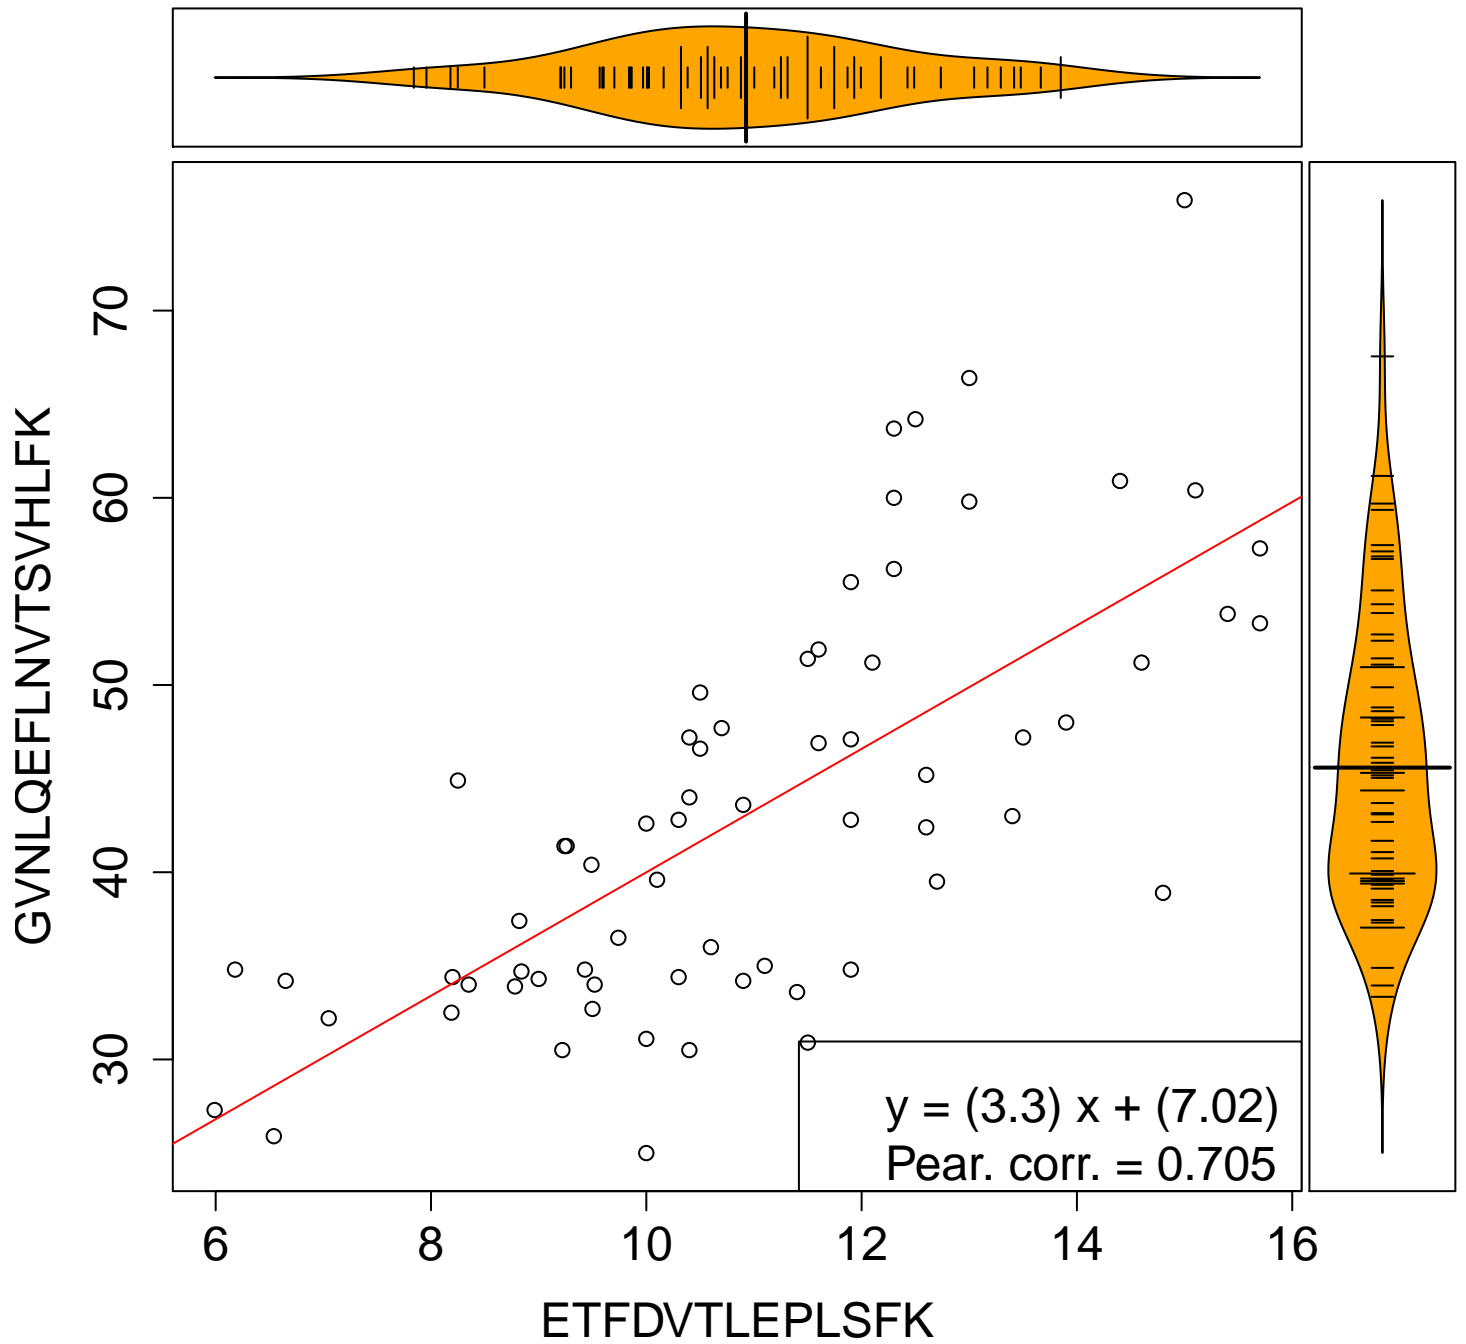

# Coagulation factor IX

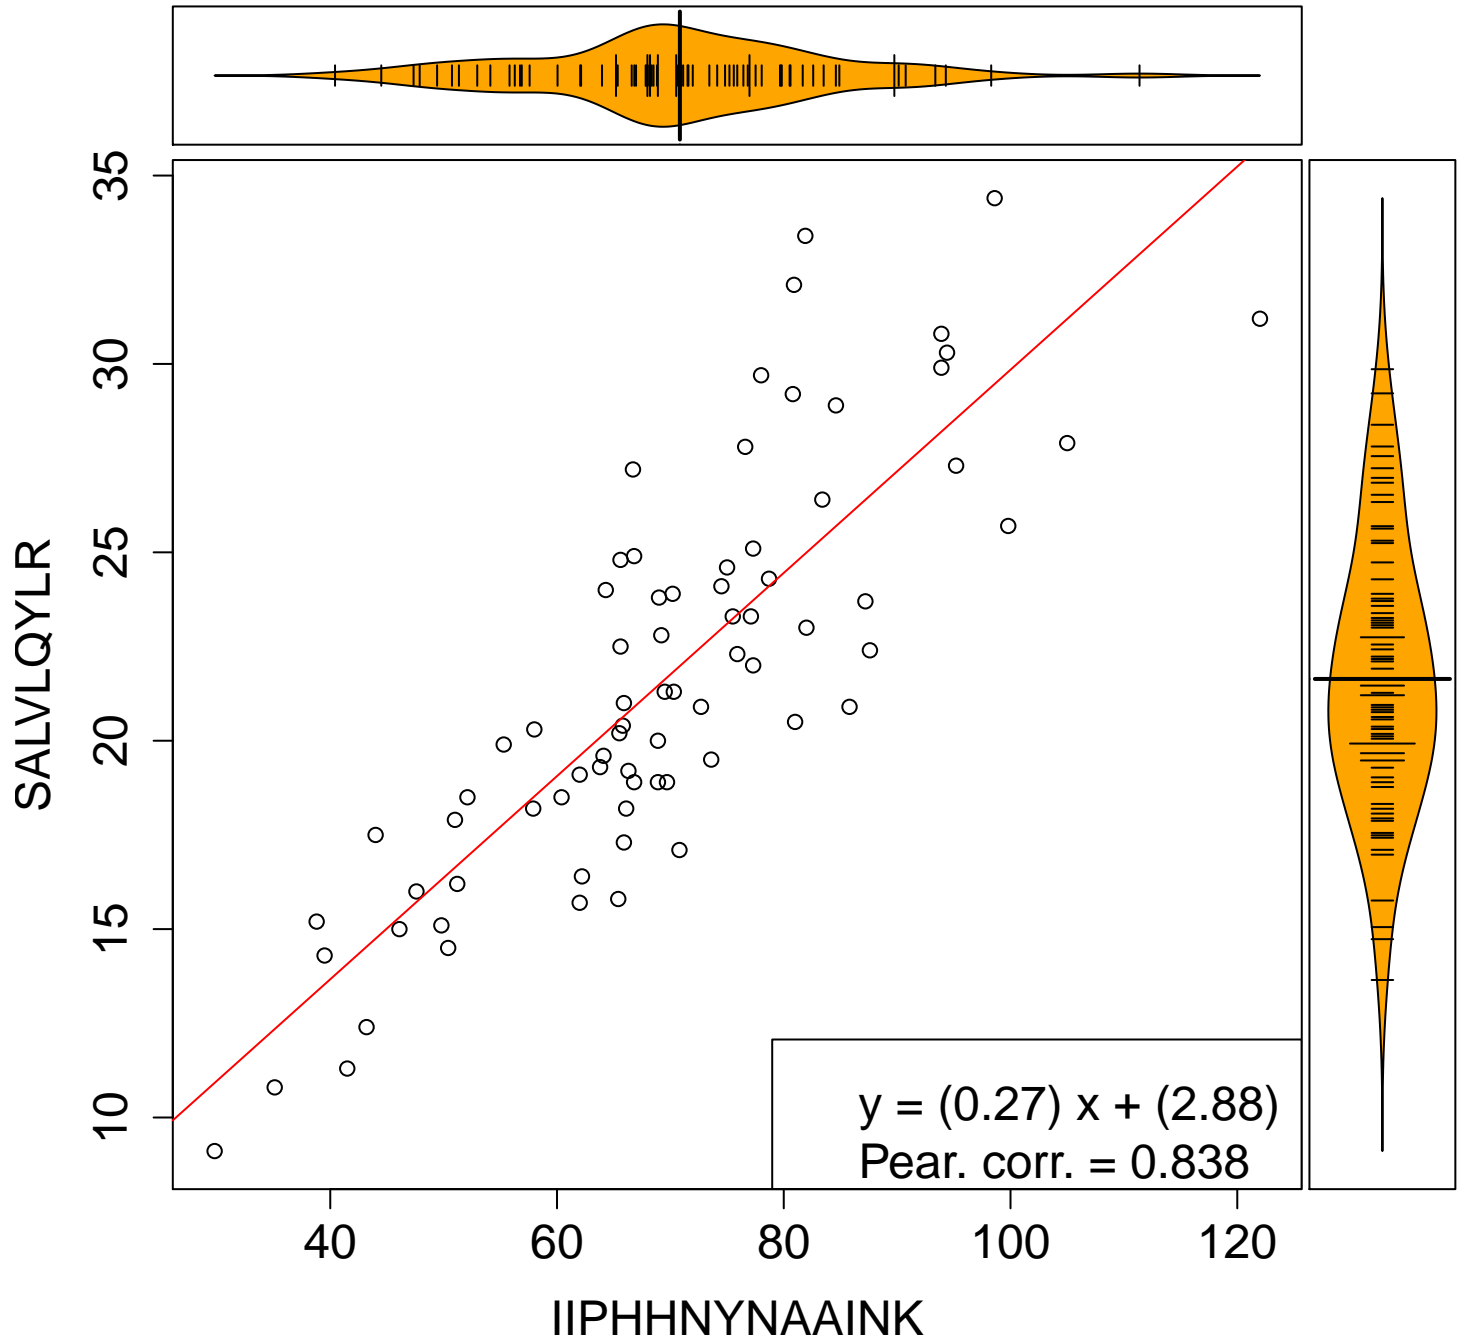

# Coagulation factor IX

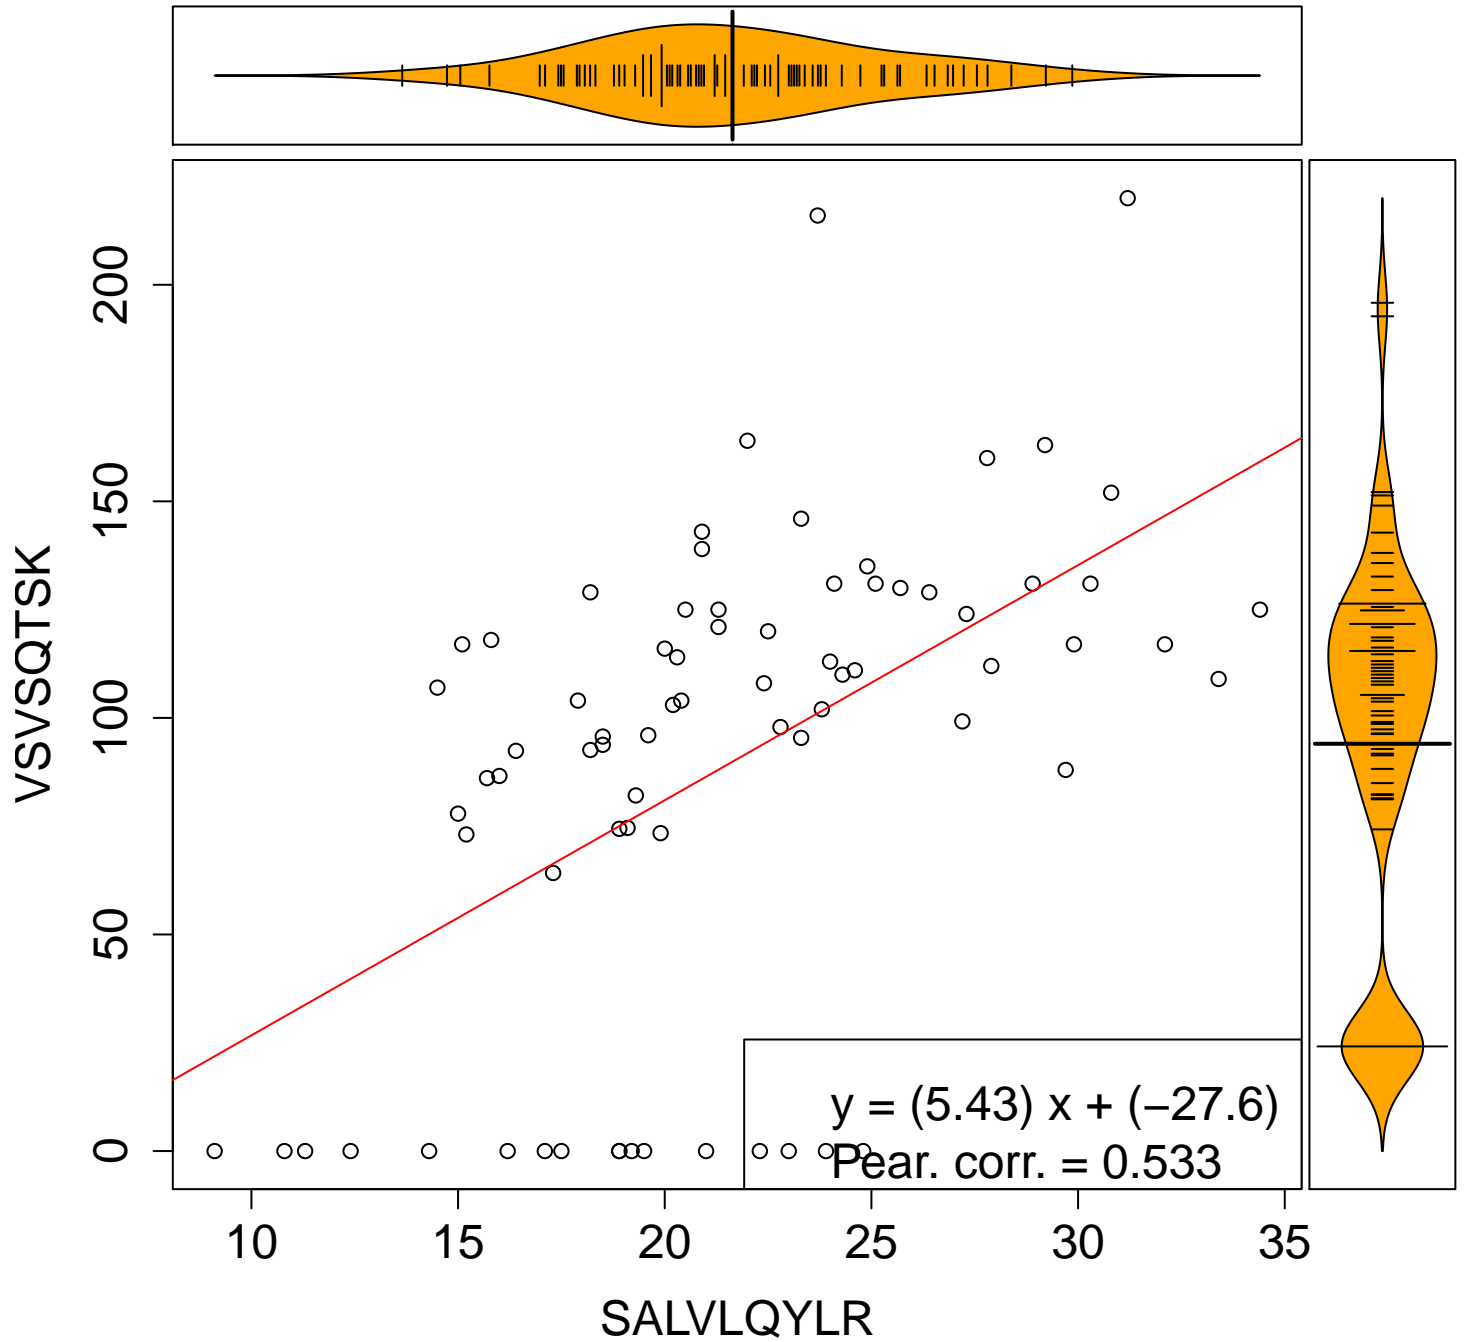

# Coagulation factor X

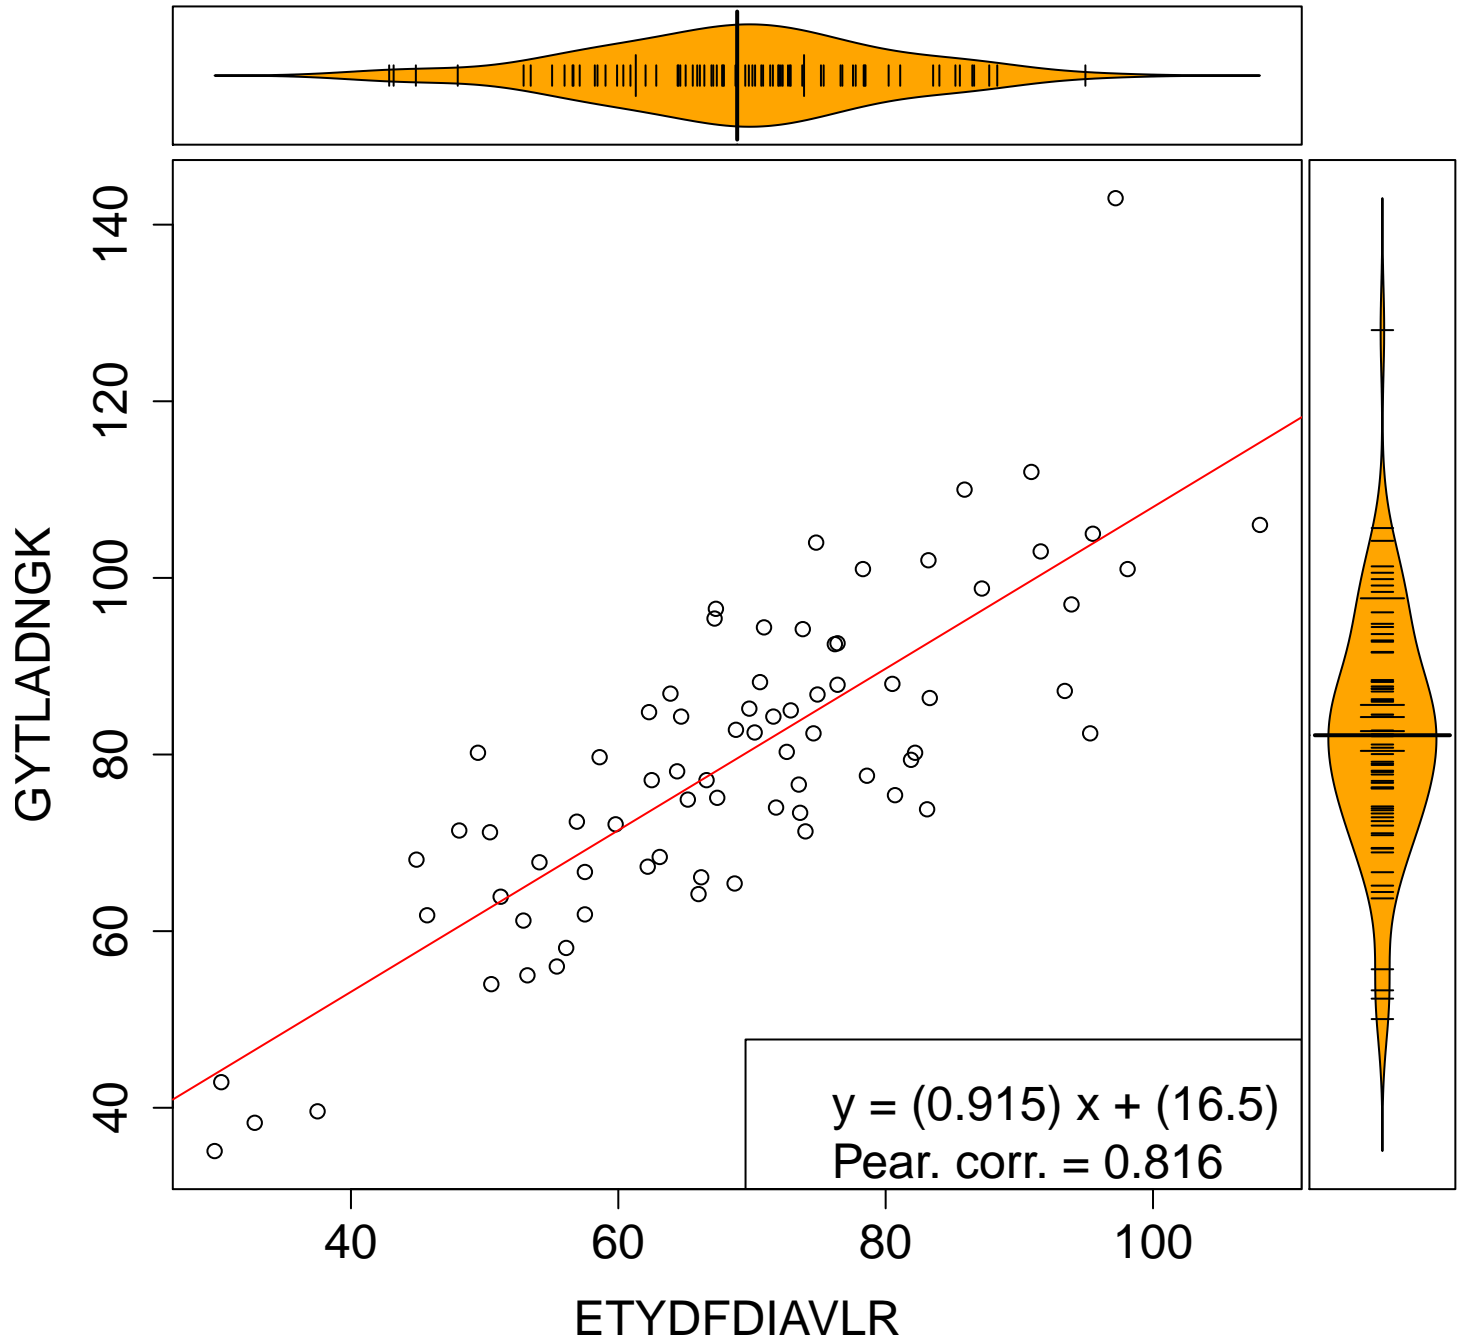

# Coagulation factor X

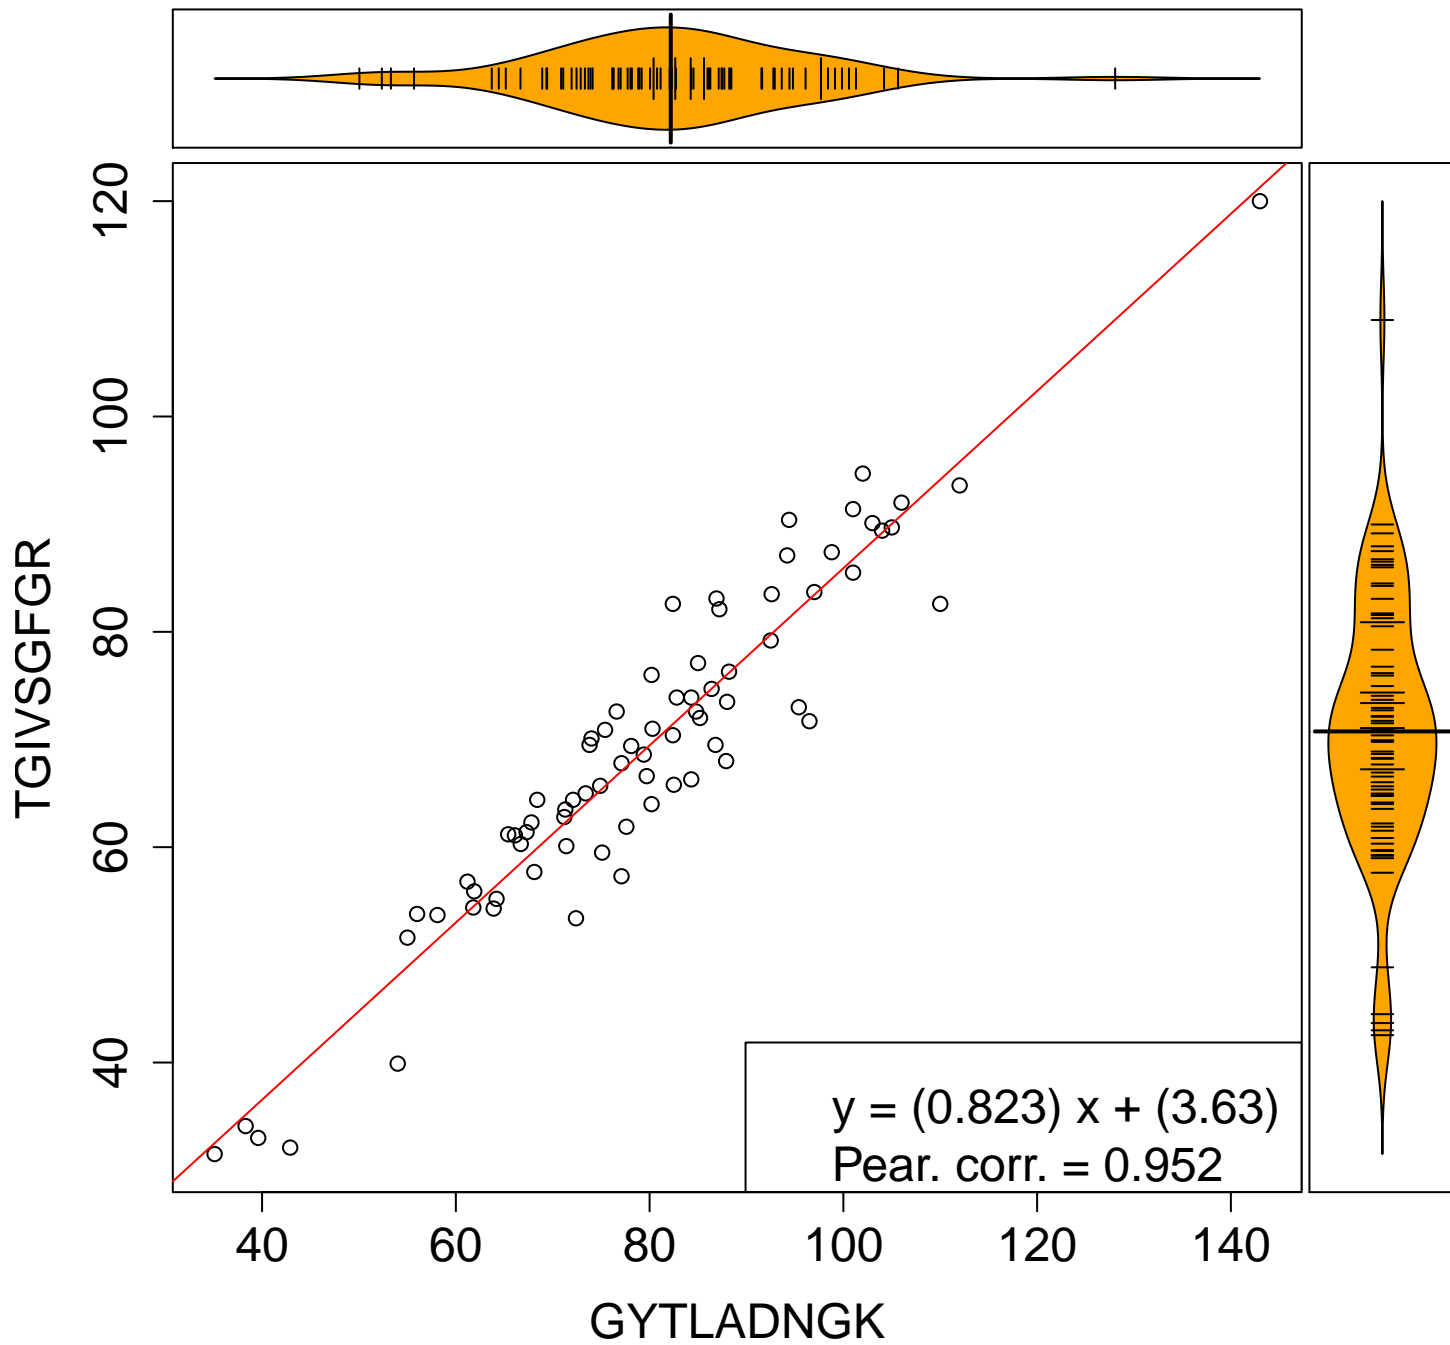



# Coagulation factor XIII B chain

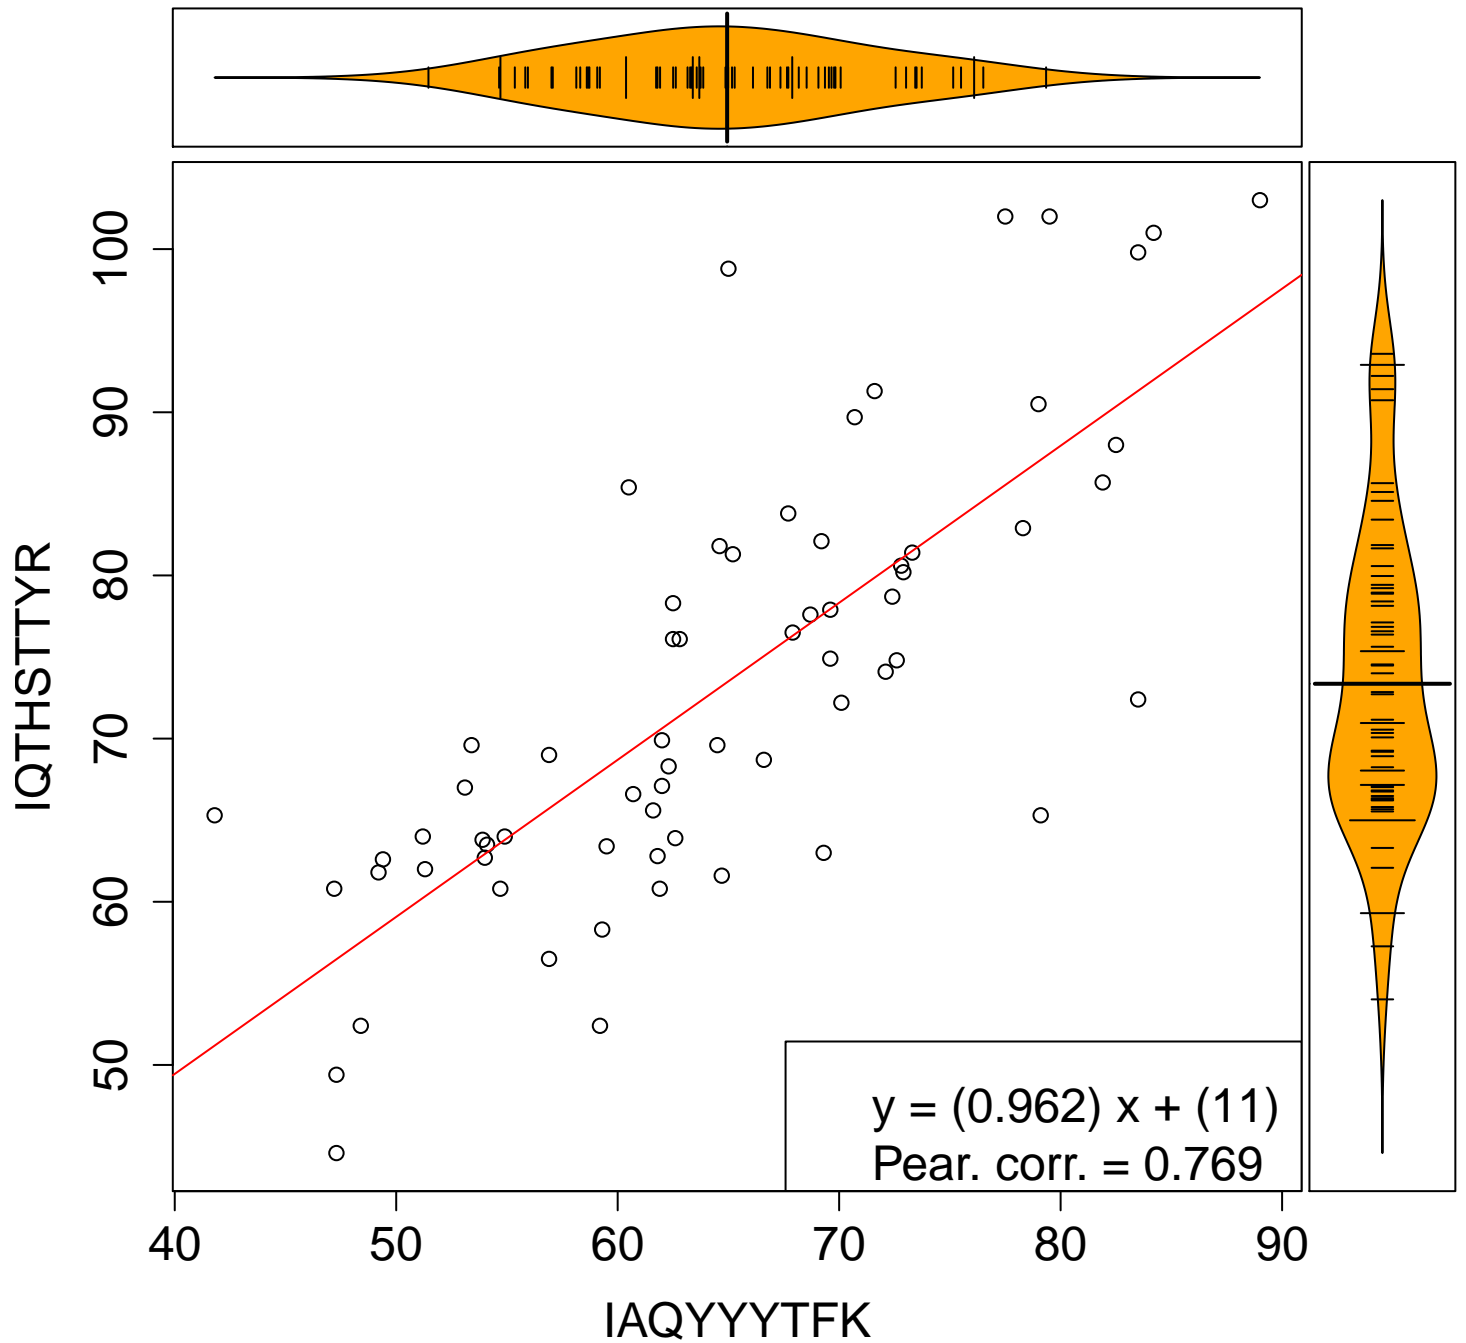

# Coagulation factor XIII B chain

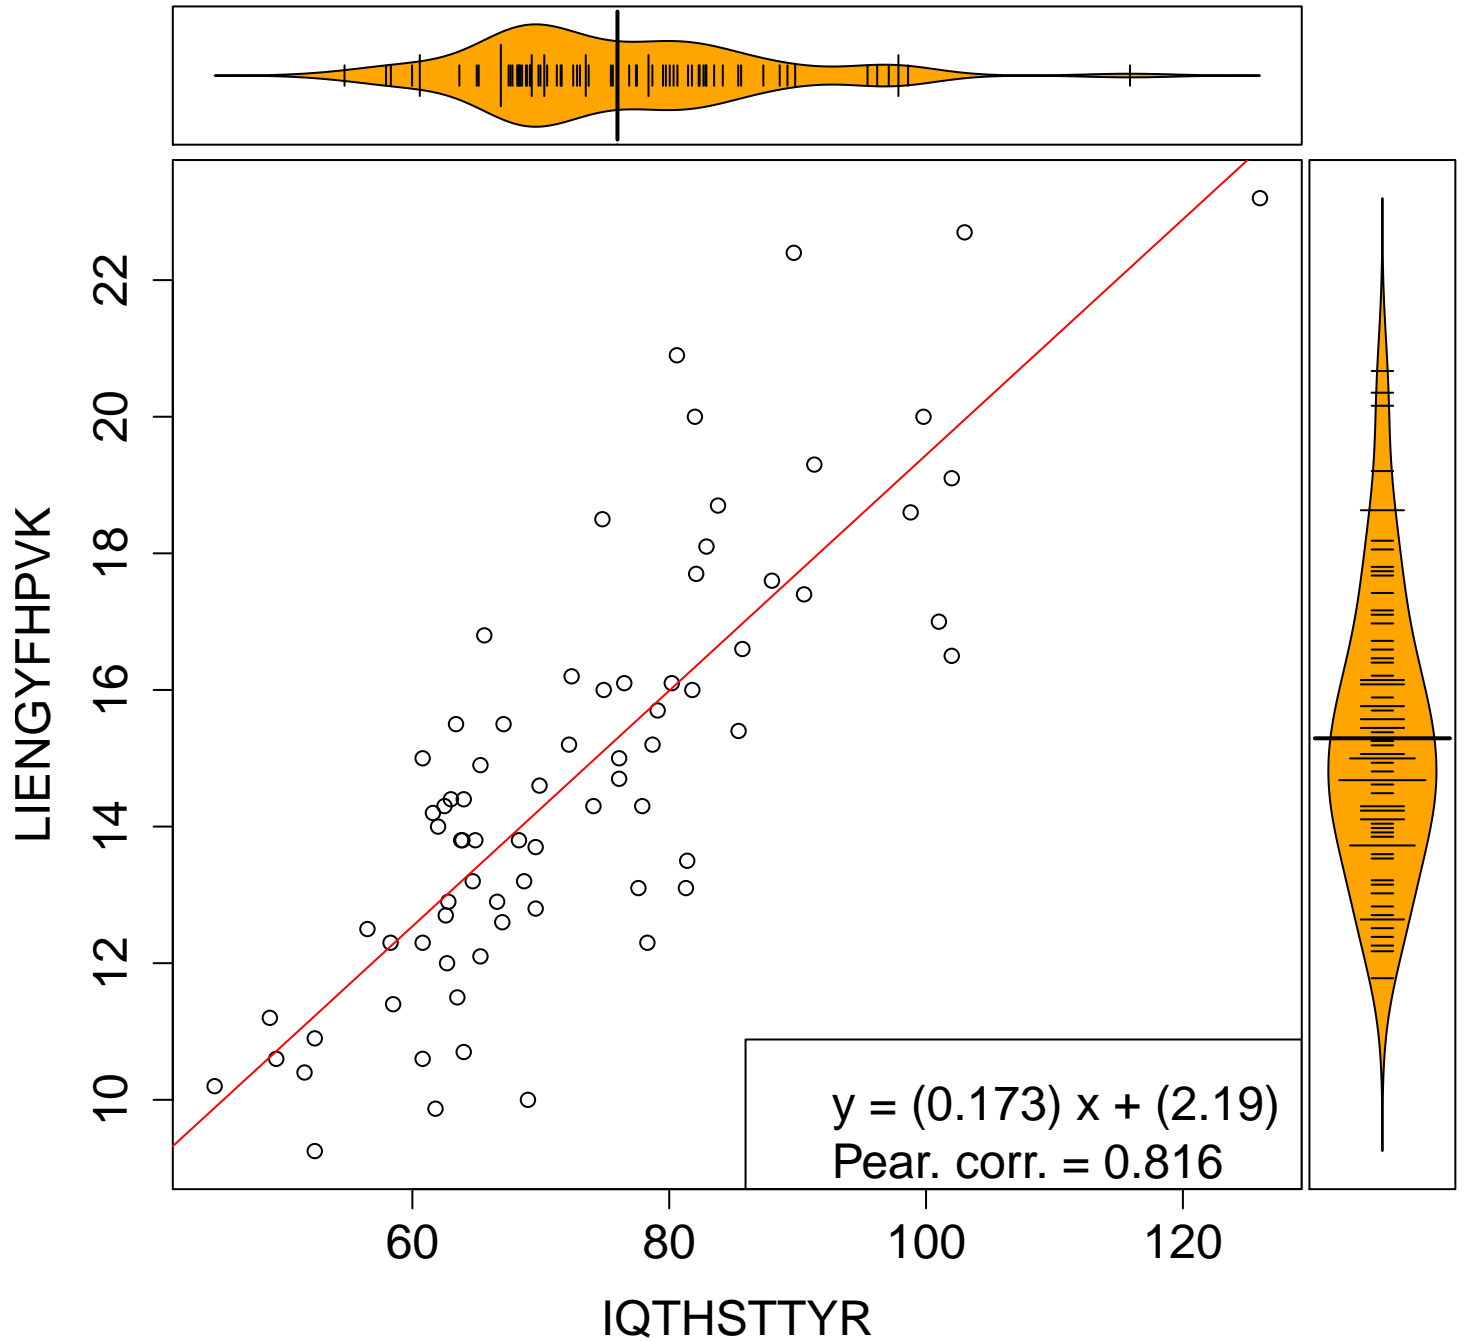

# Plasma protease C1 inhibitor

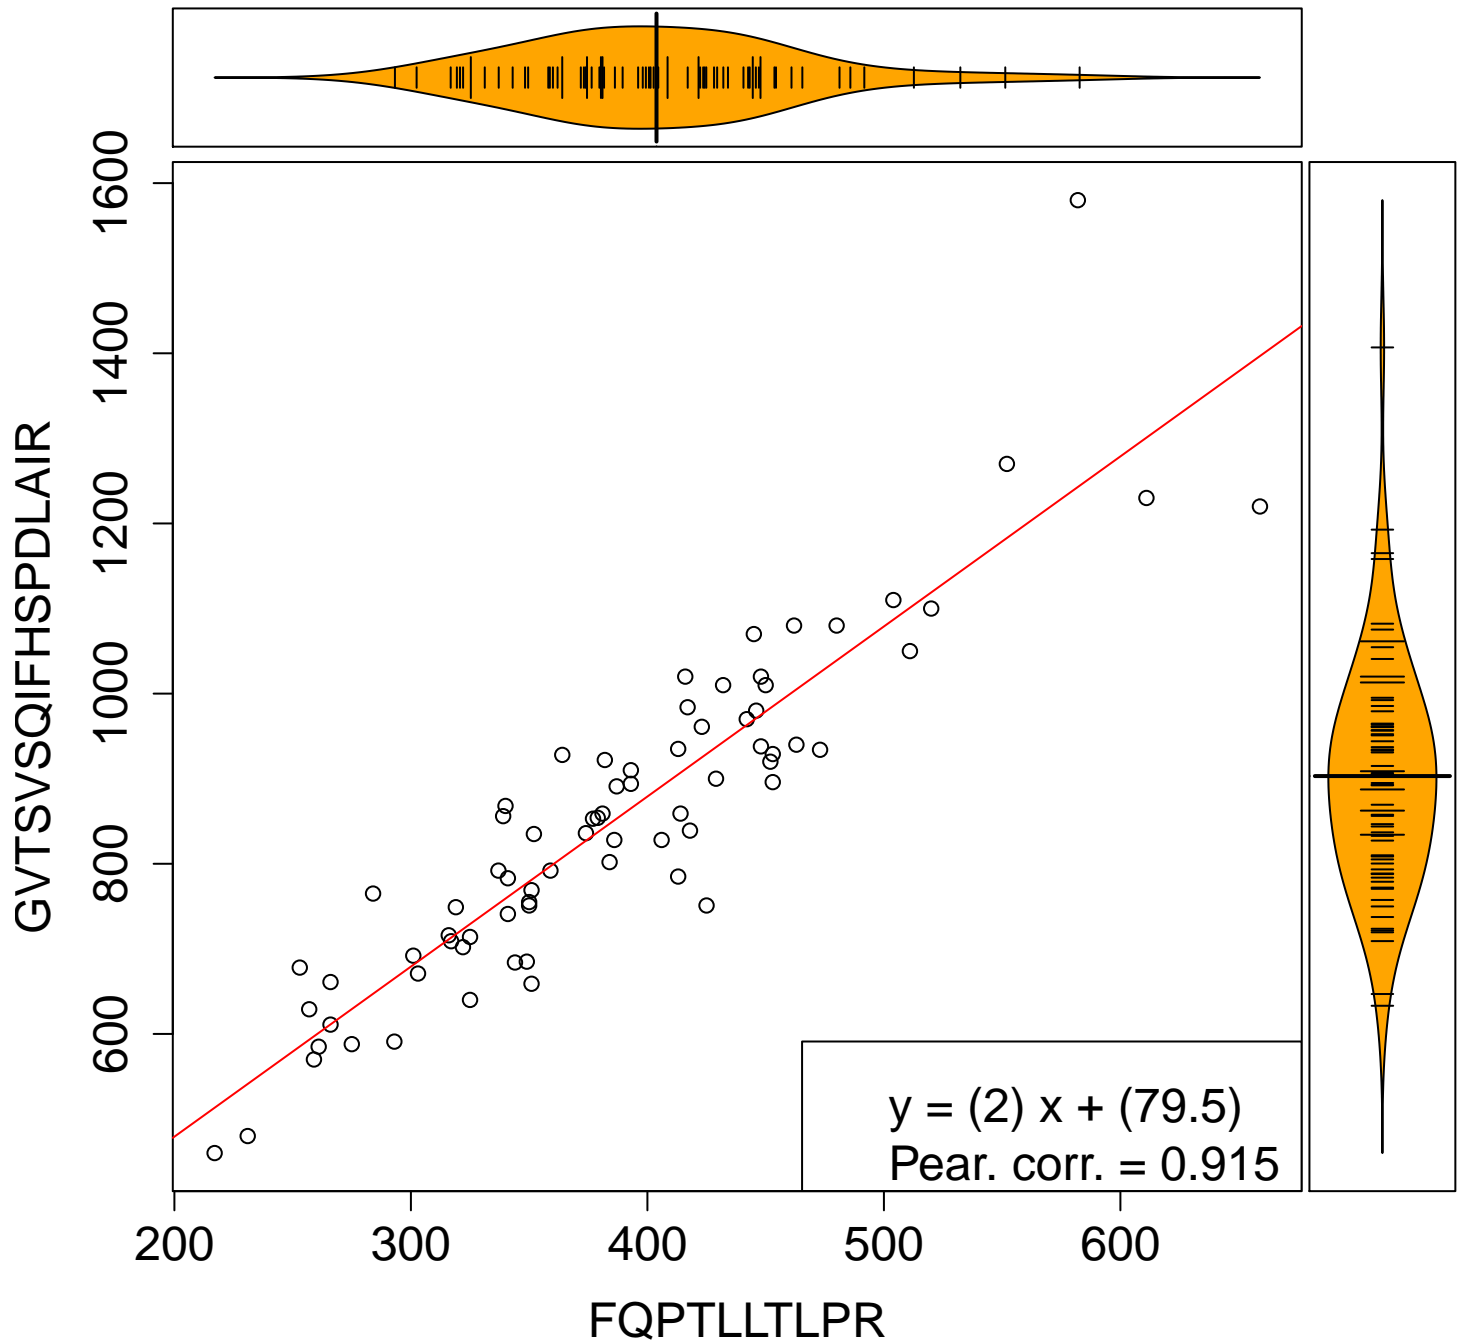

# Plasma protease C1 inhibitor

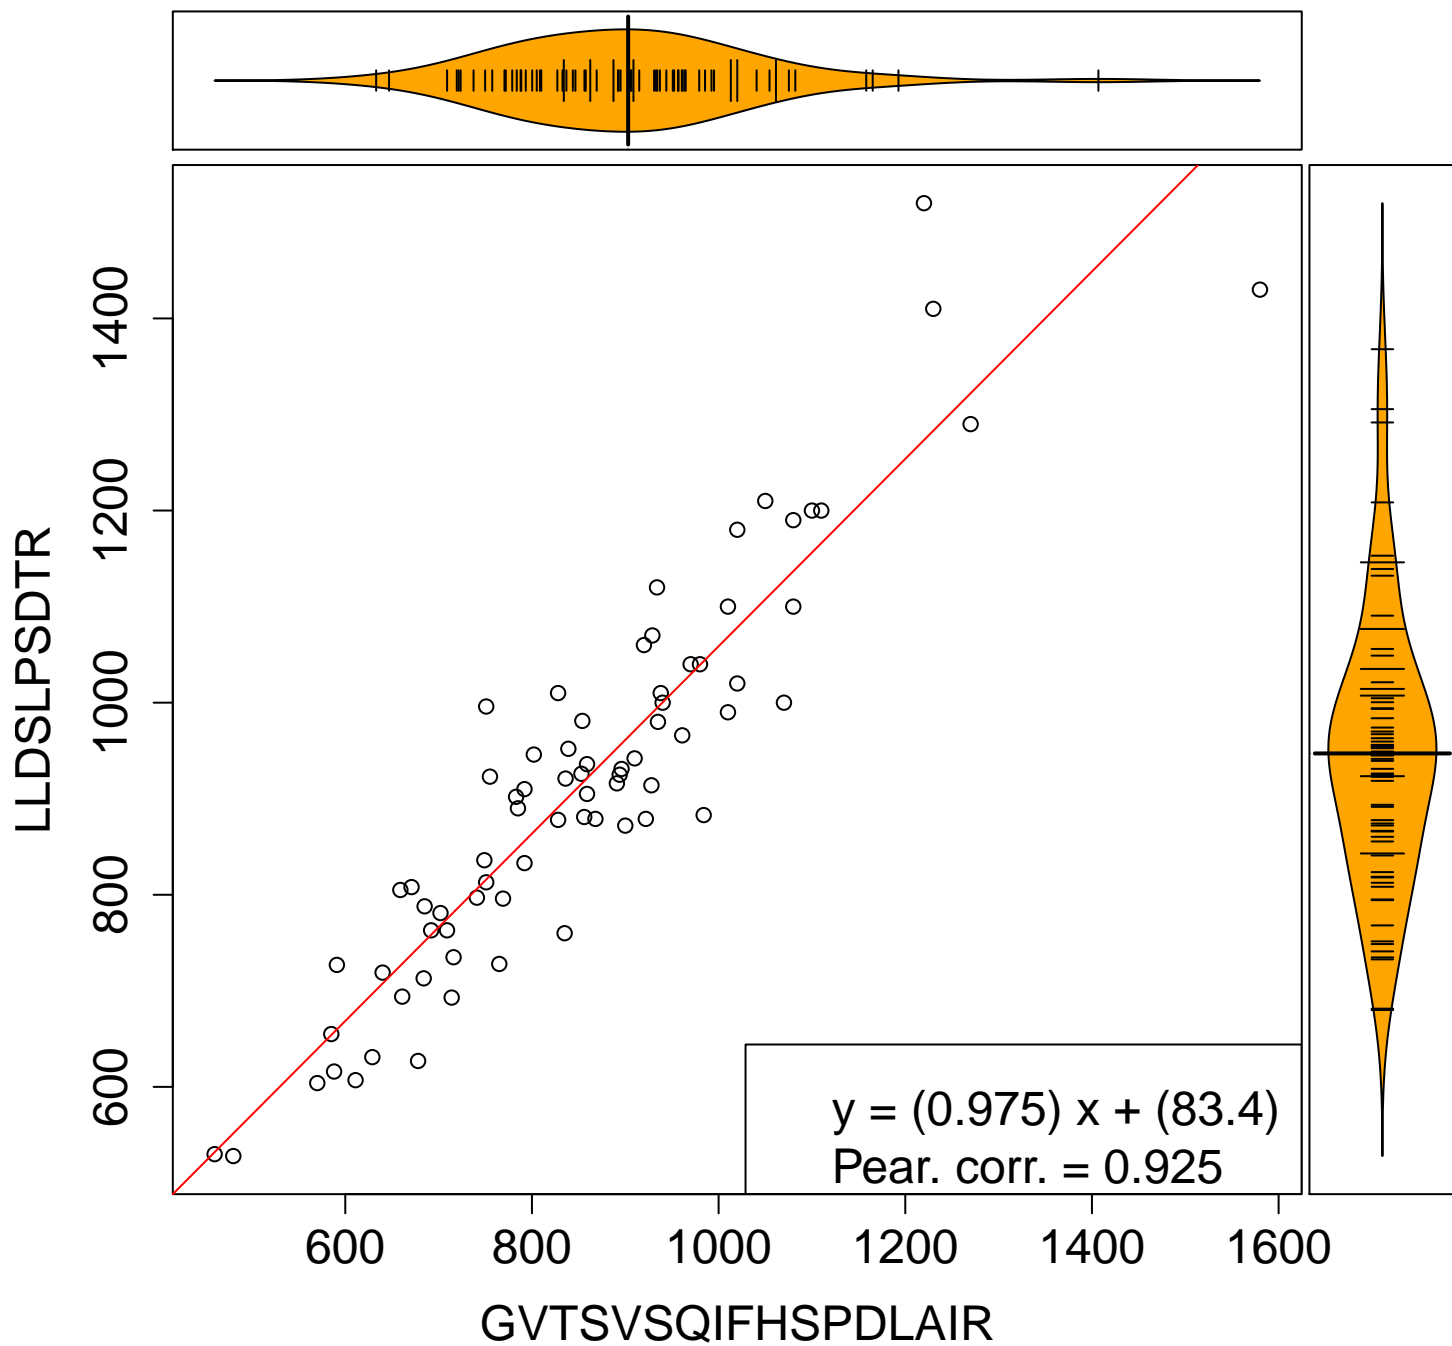

# Fibrinogen alpha chain

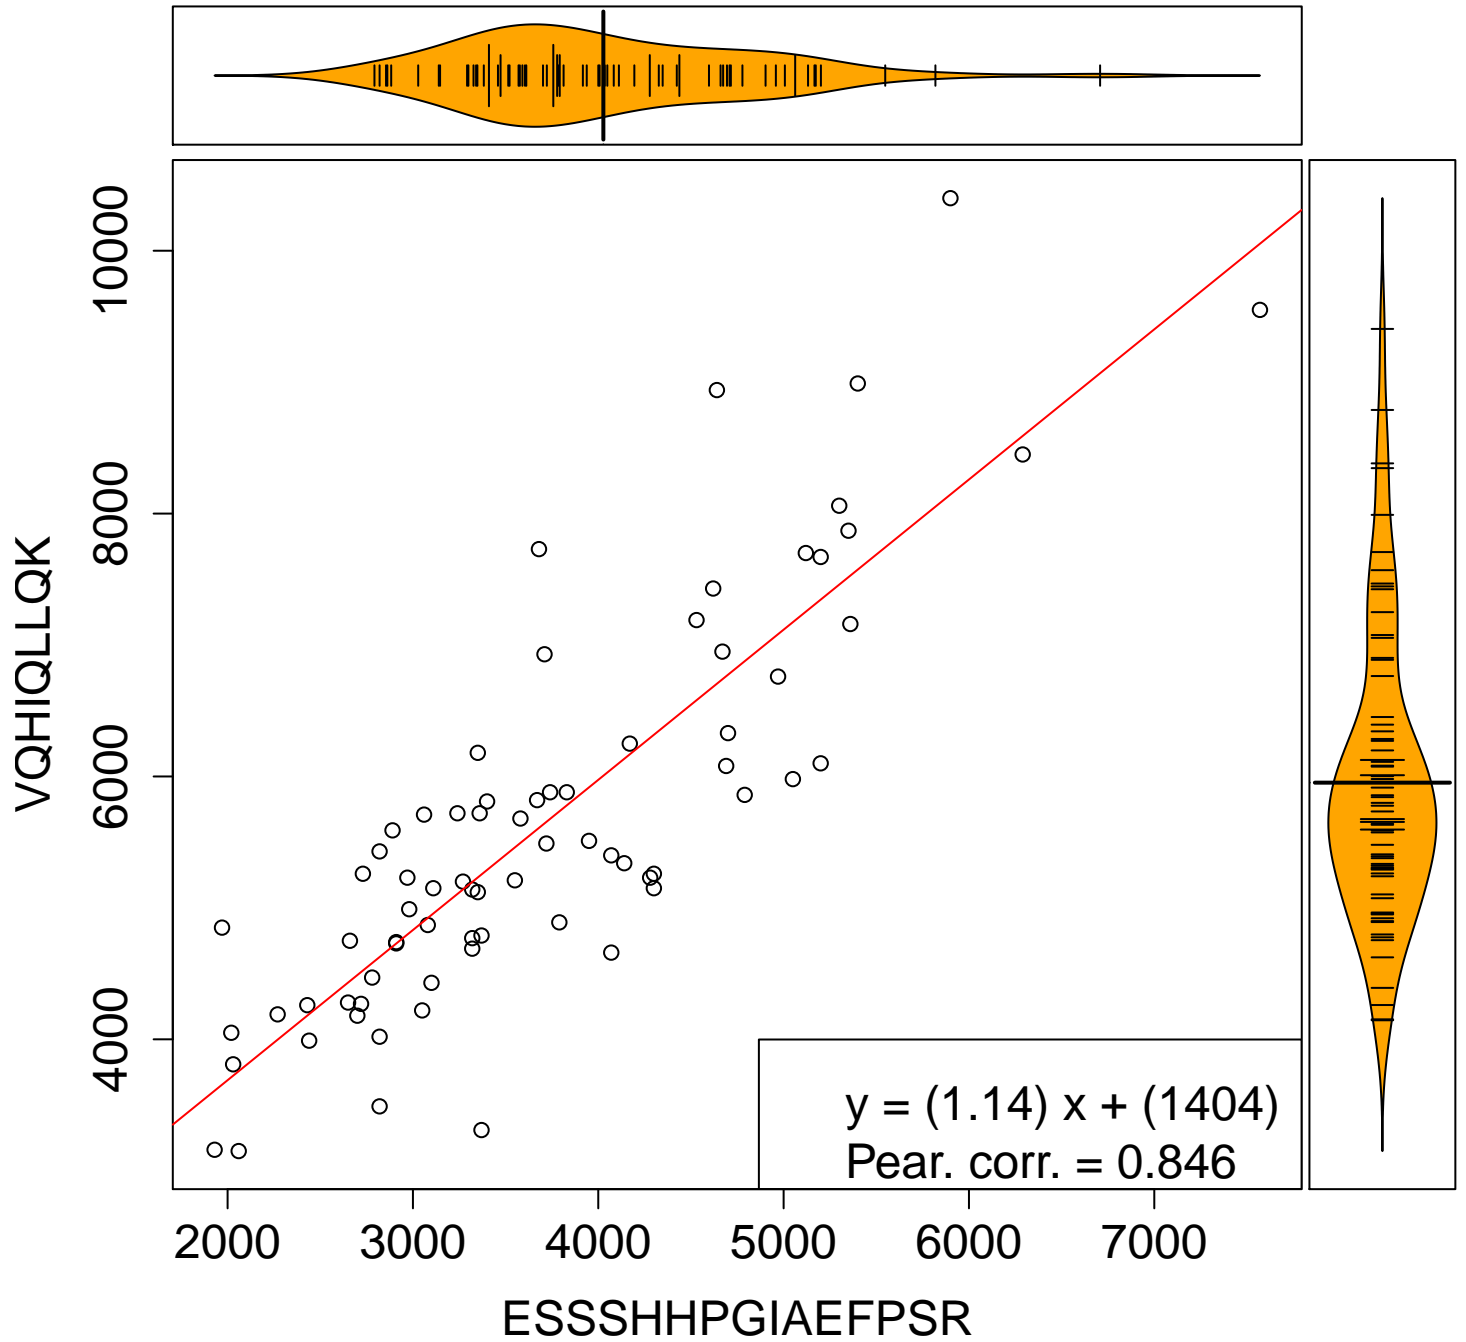

# Fibrinogen alpha chain

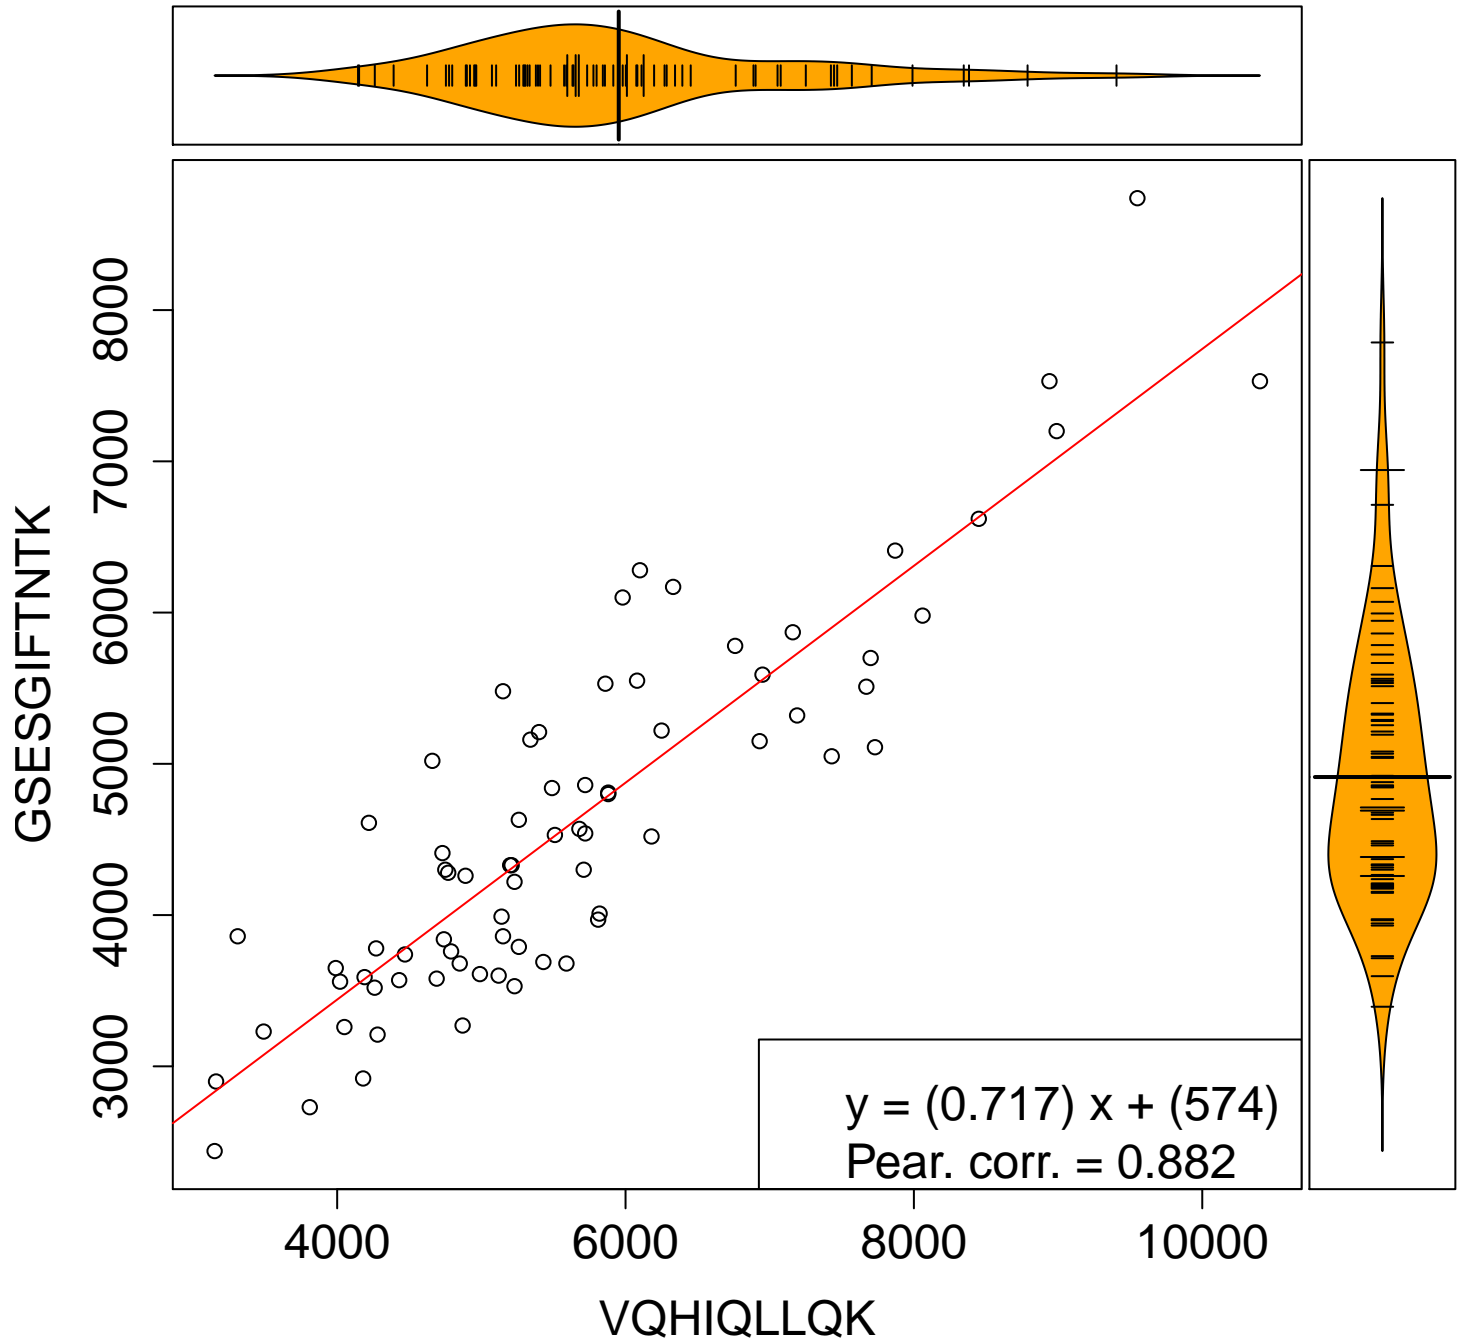

# Fibrinogen beta chain

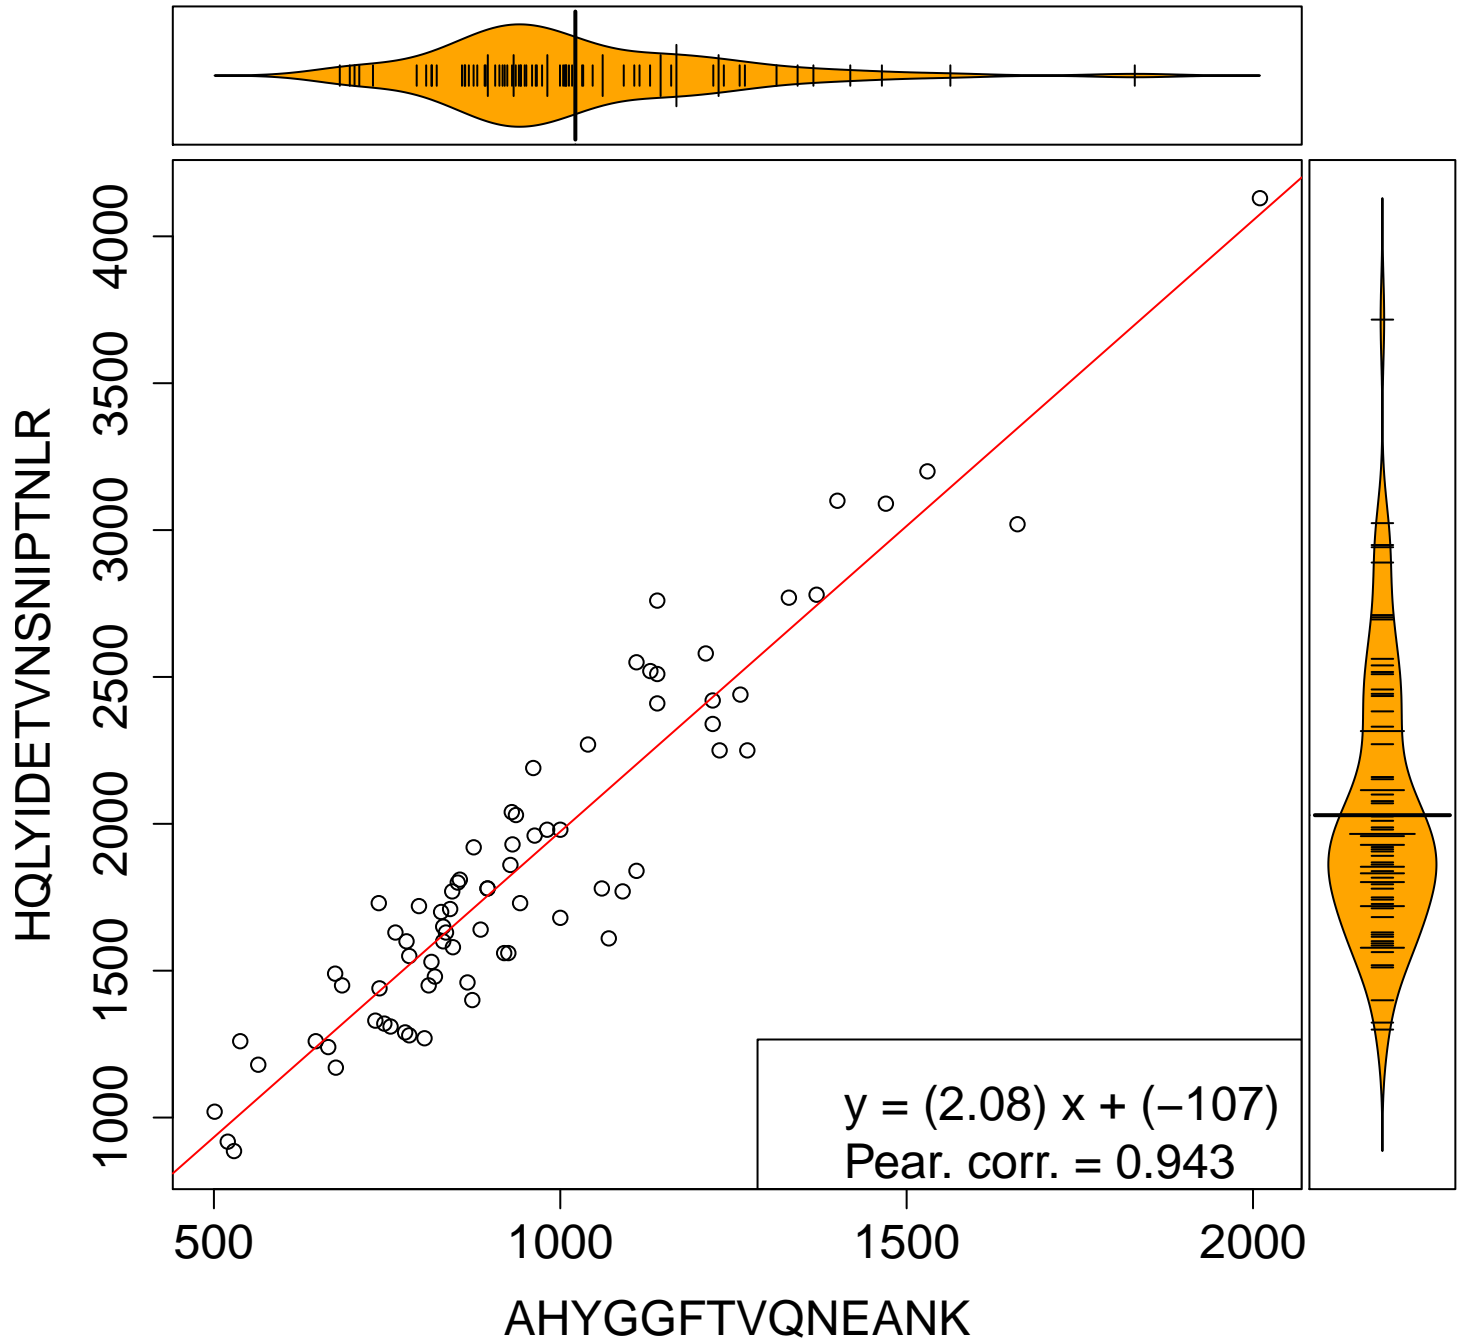

# Fibrinogen beta chain

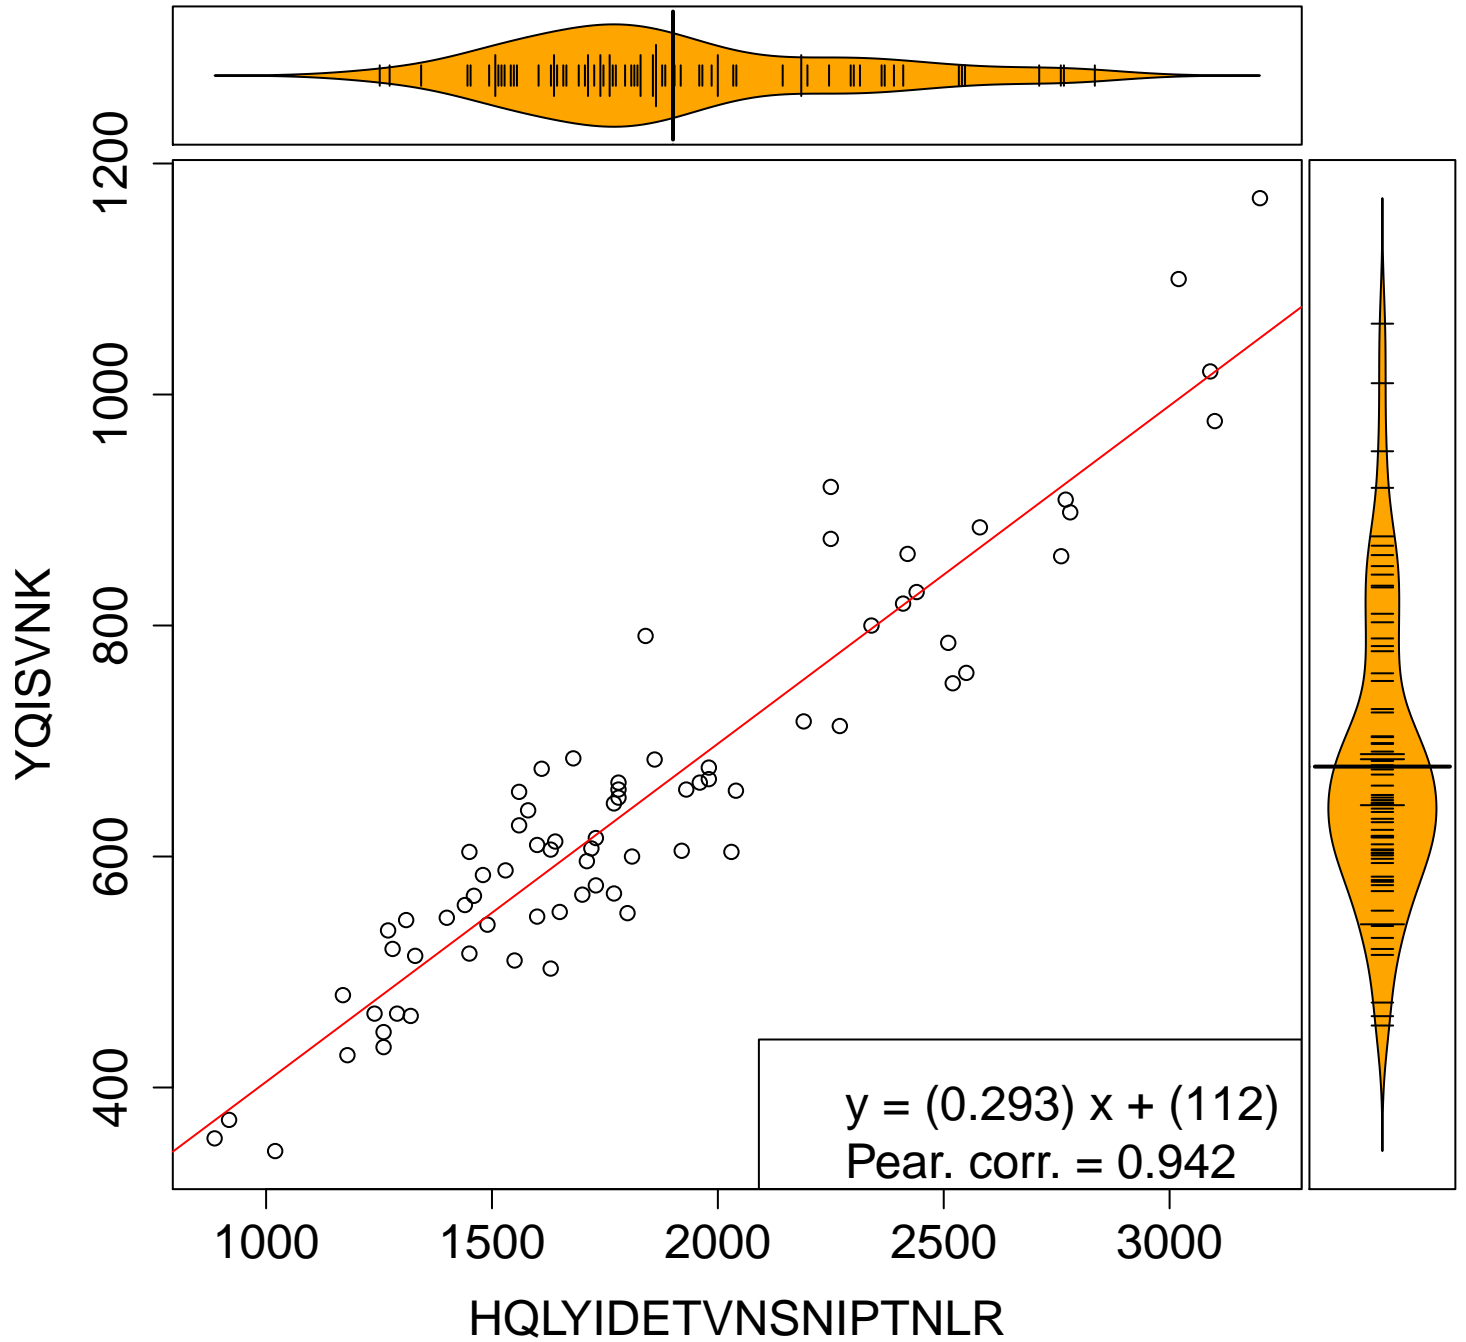



# Fibrinogen gamma chain

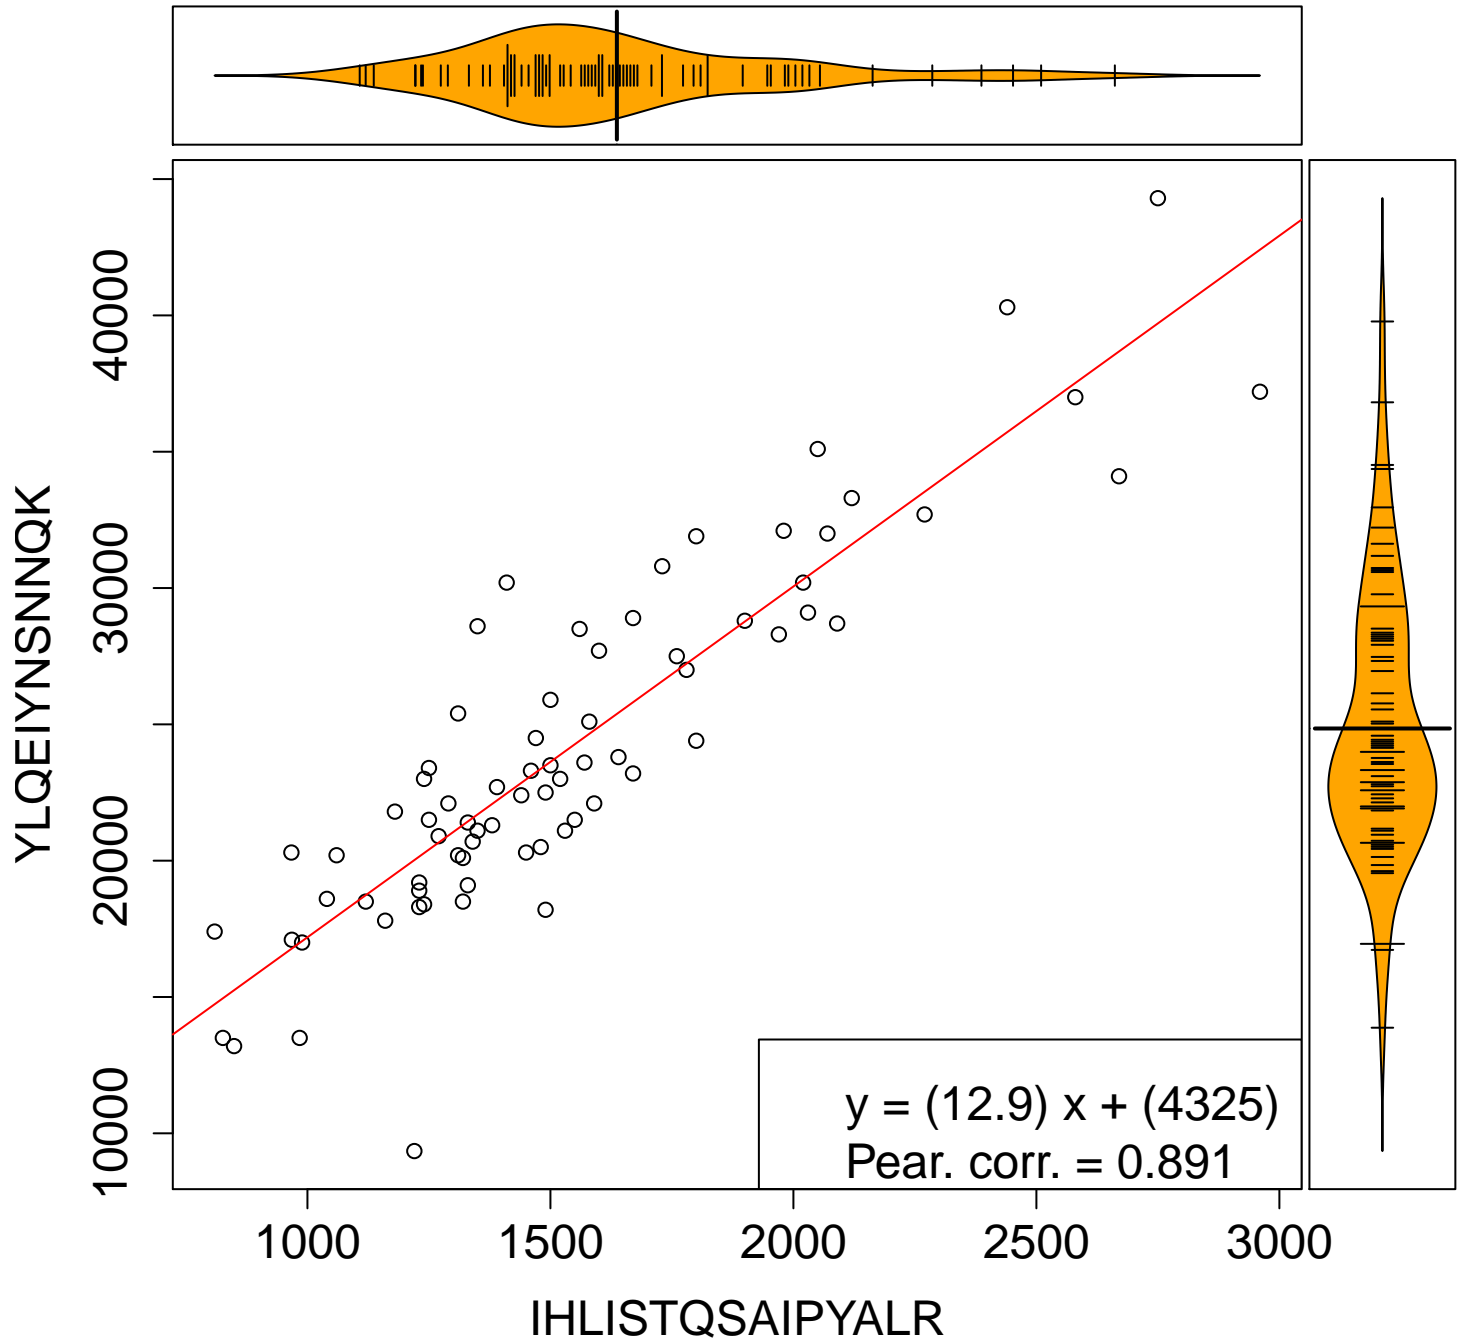

# Fibrinogen gamma chain

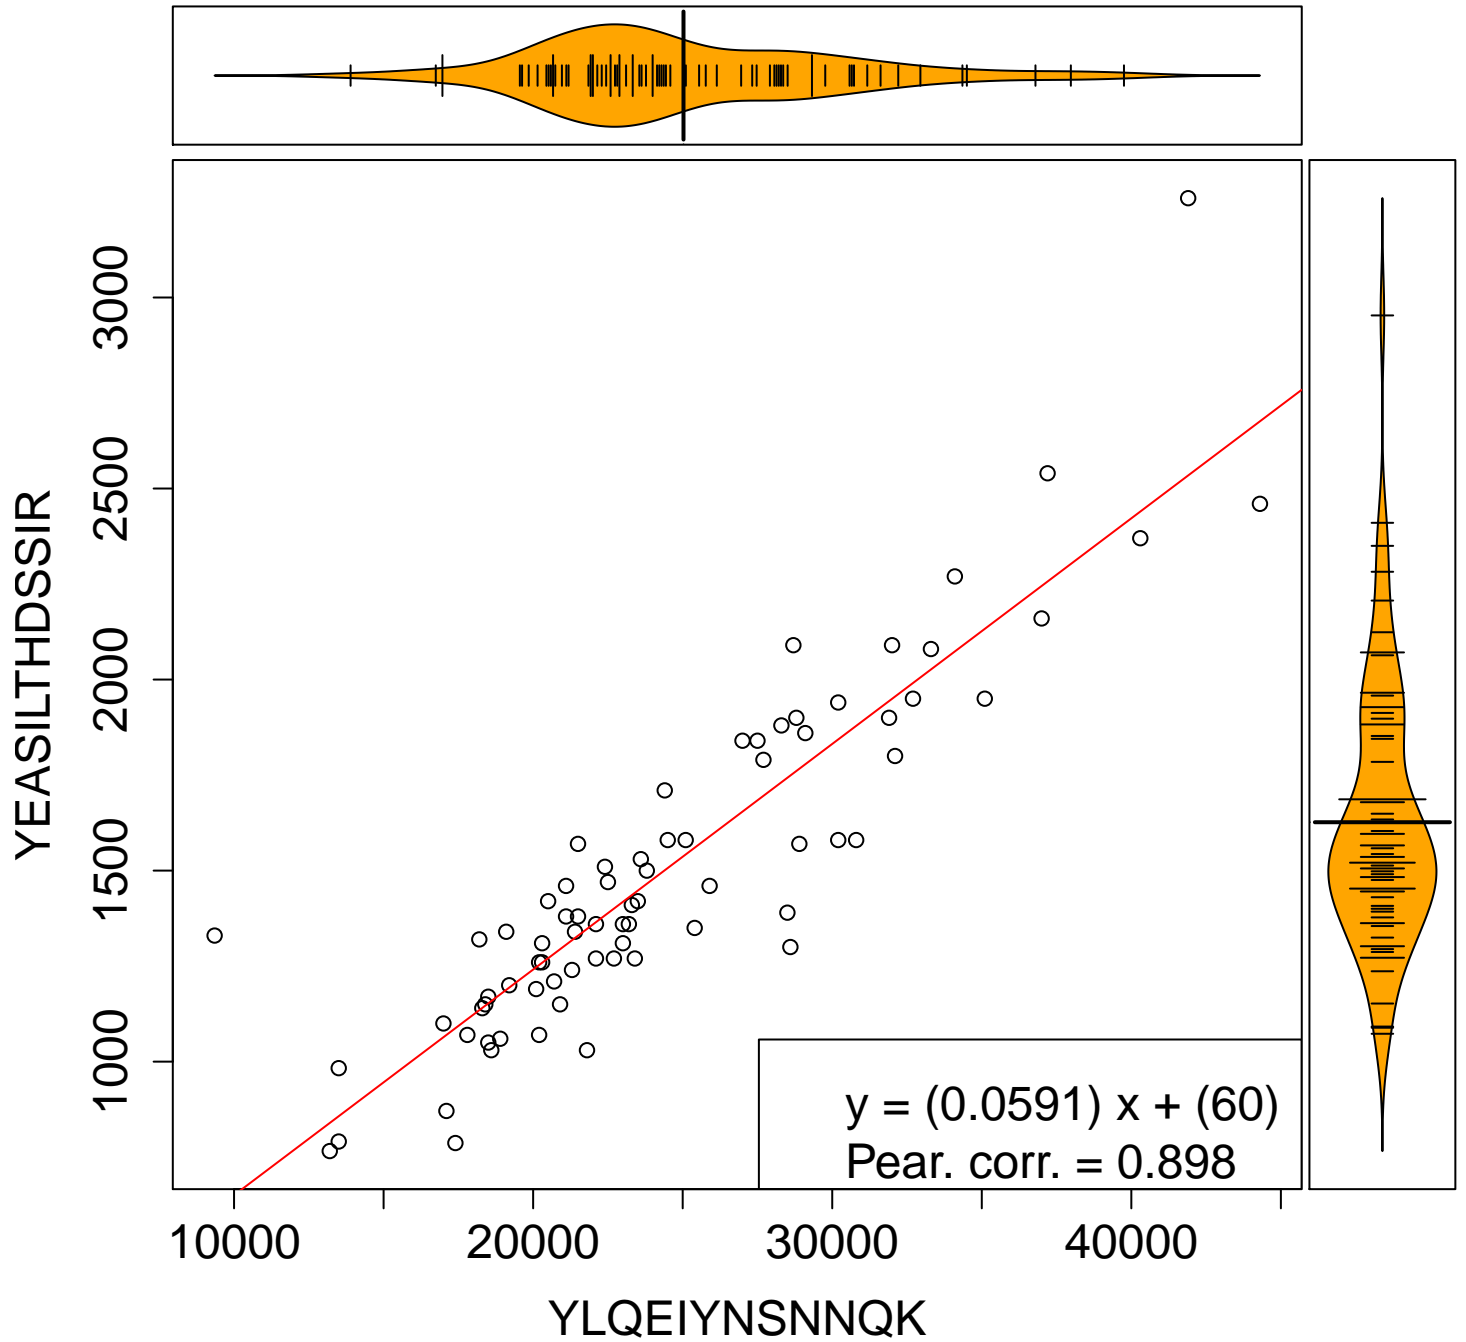

# Heparin cofactor 2

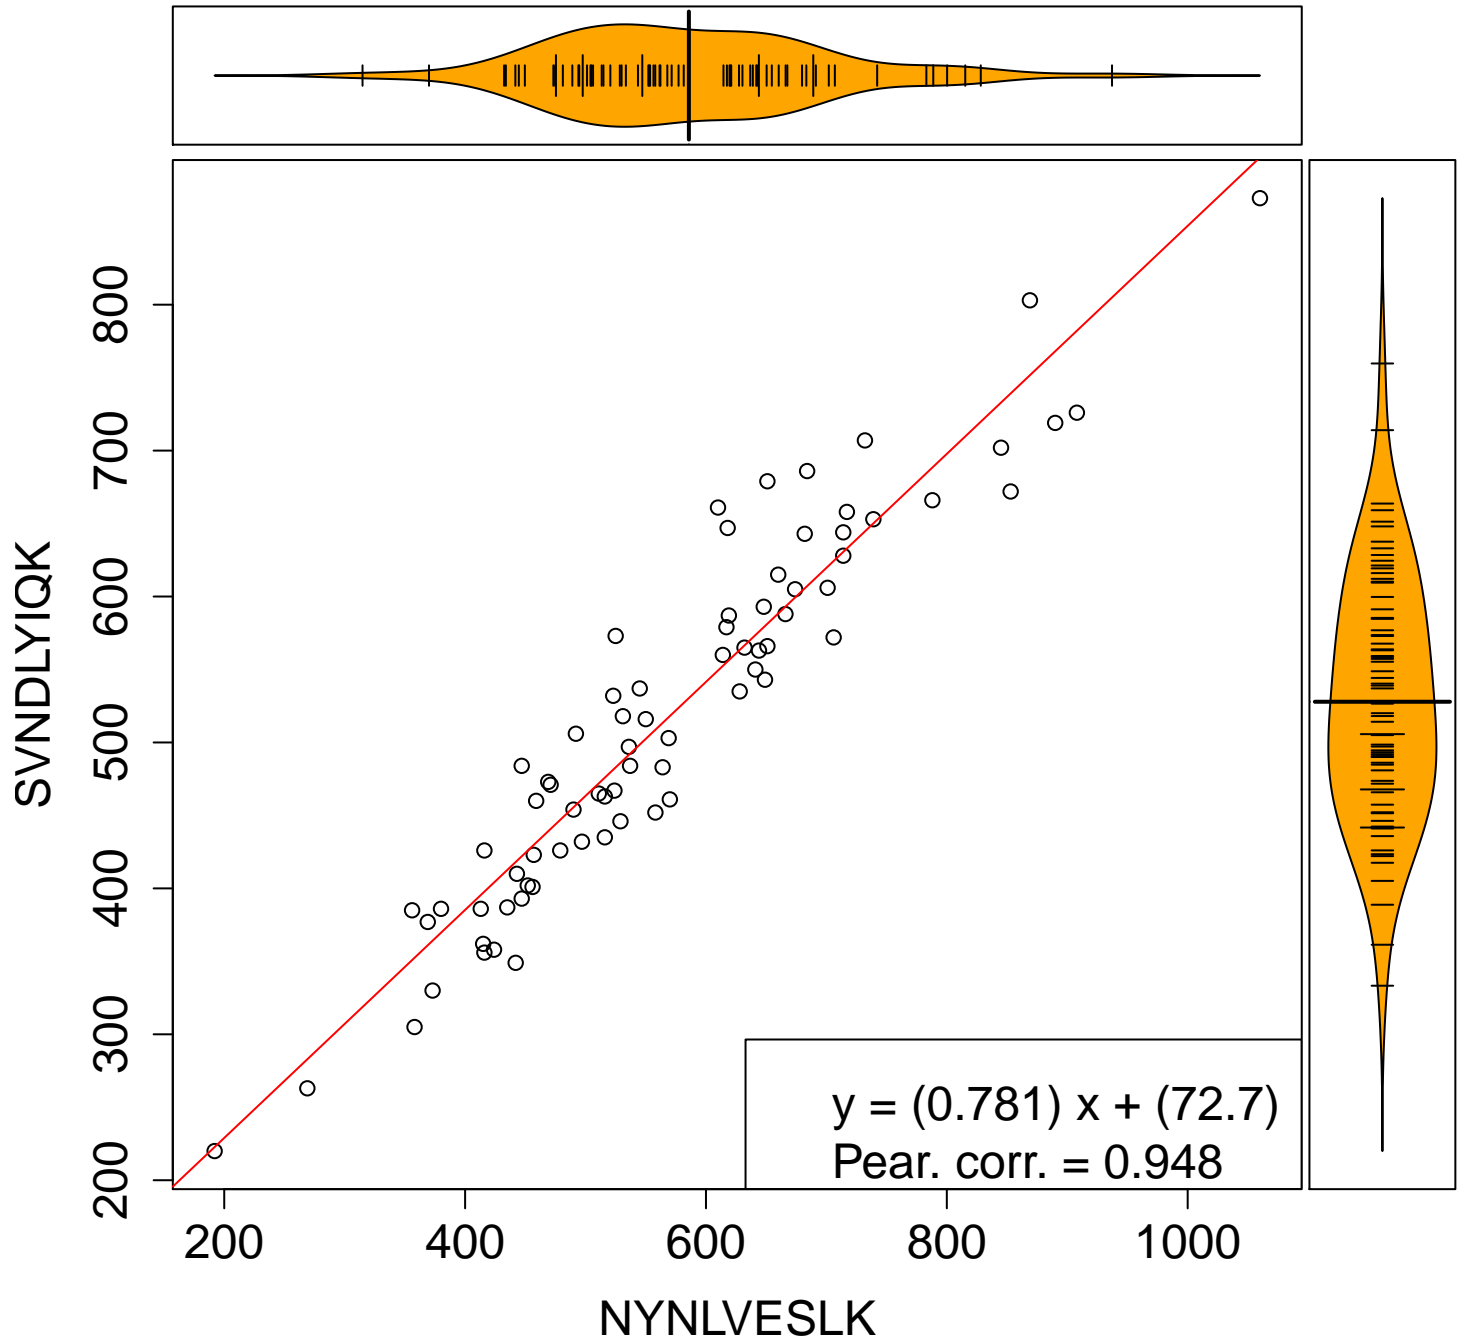

# Heparin cofactor 2

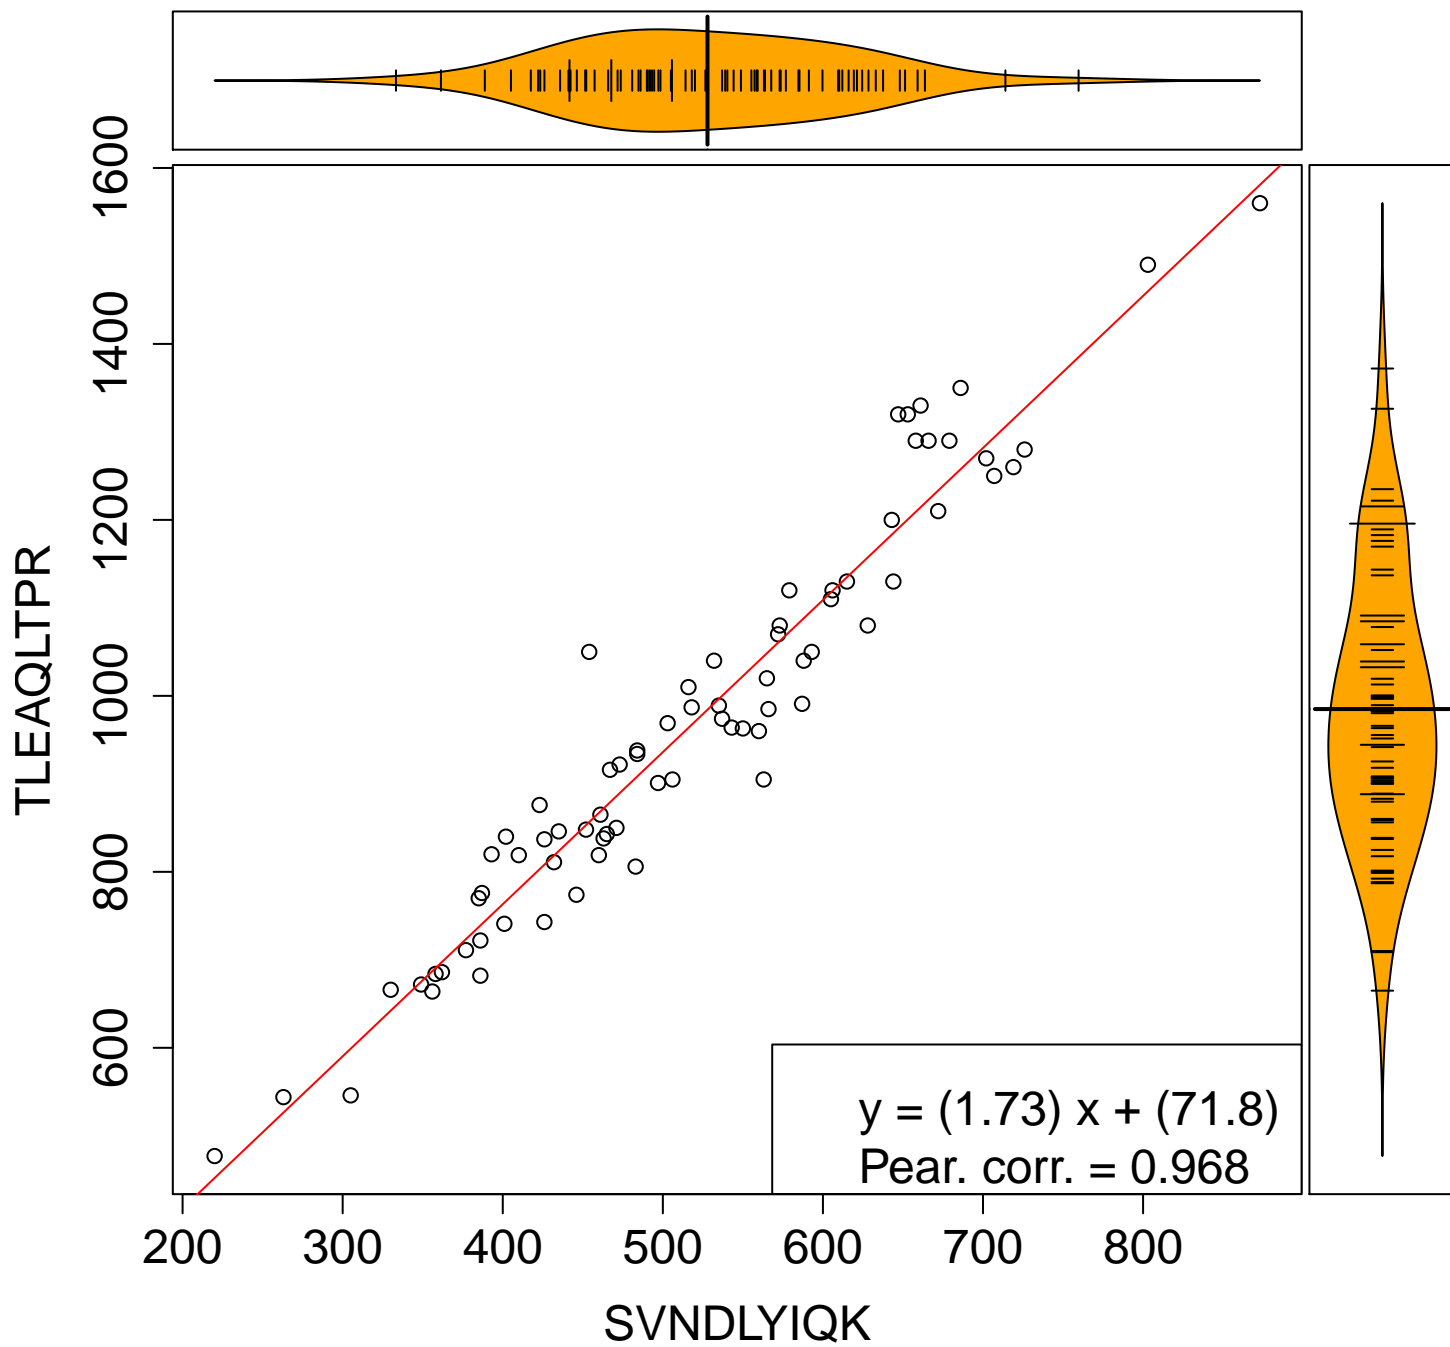

# Histidine-rich glycoprotein

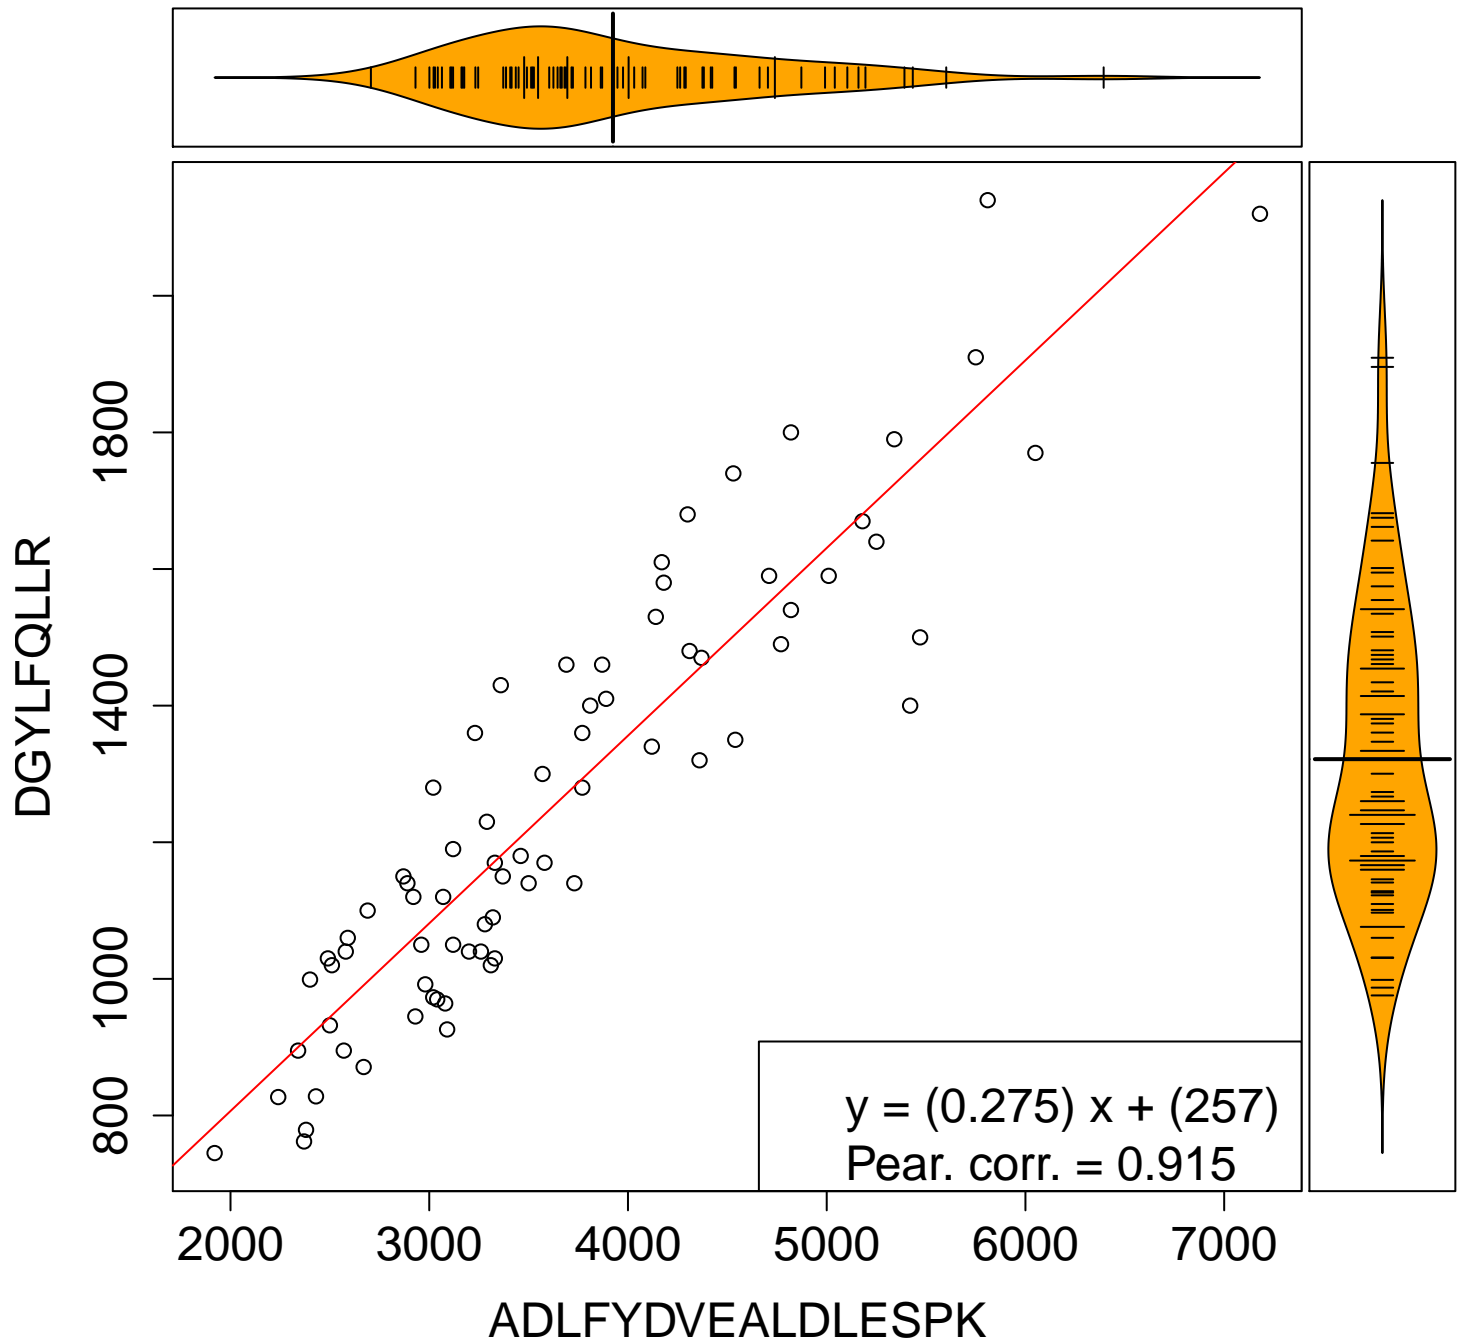

# Histidine-rich glycoprotein

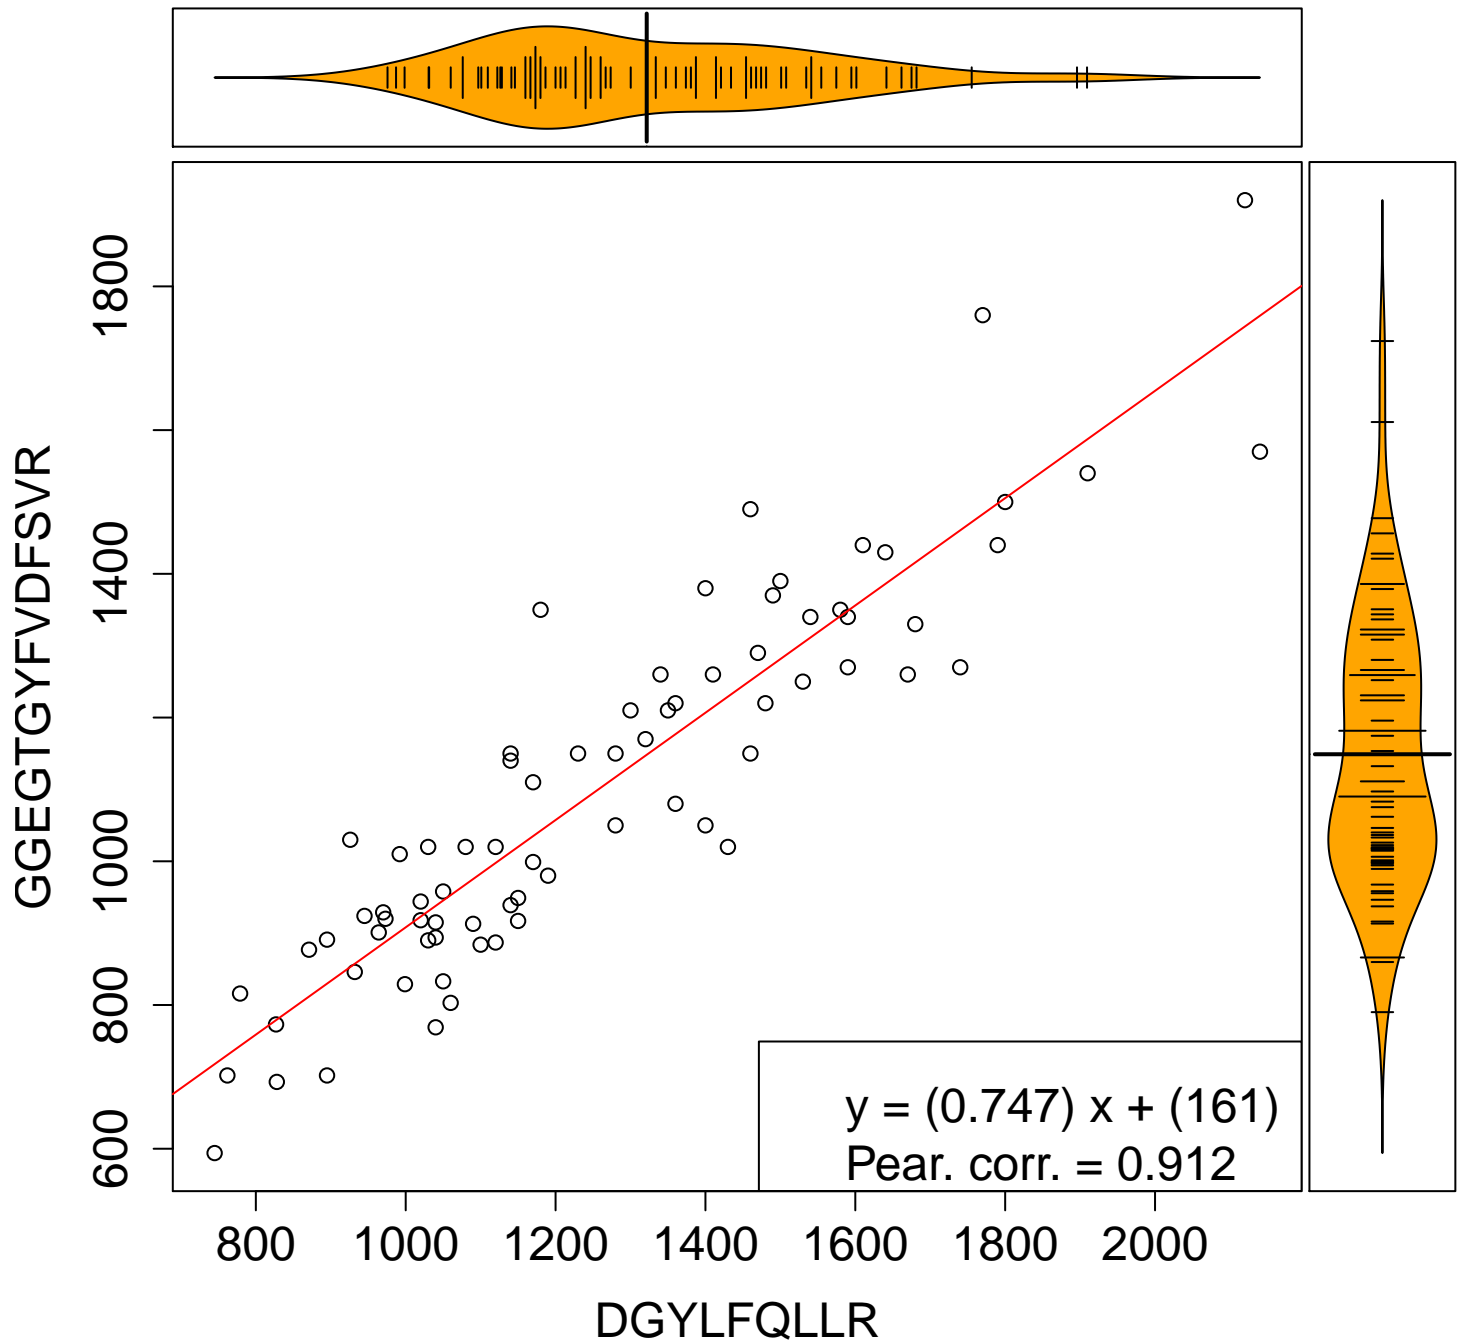

# Kininogen-1

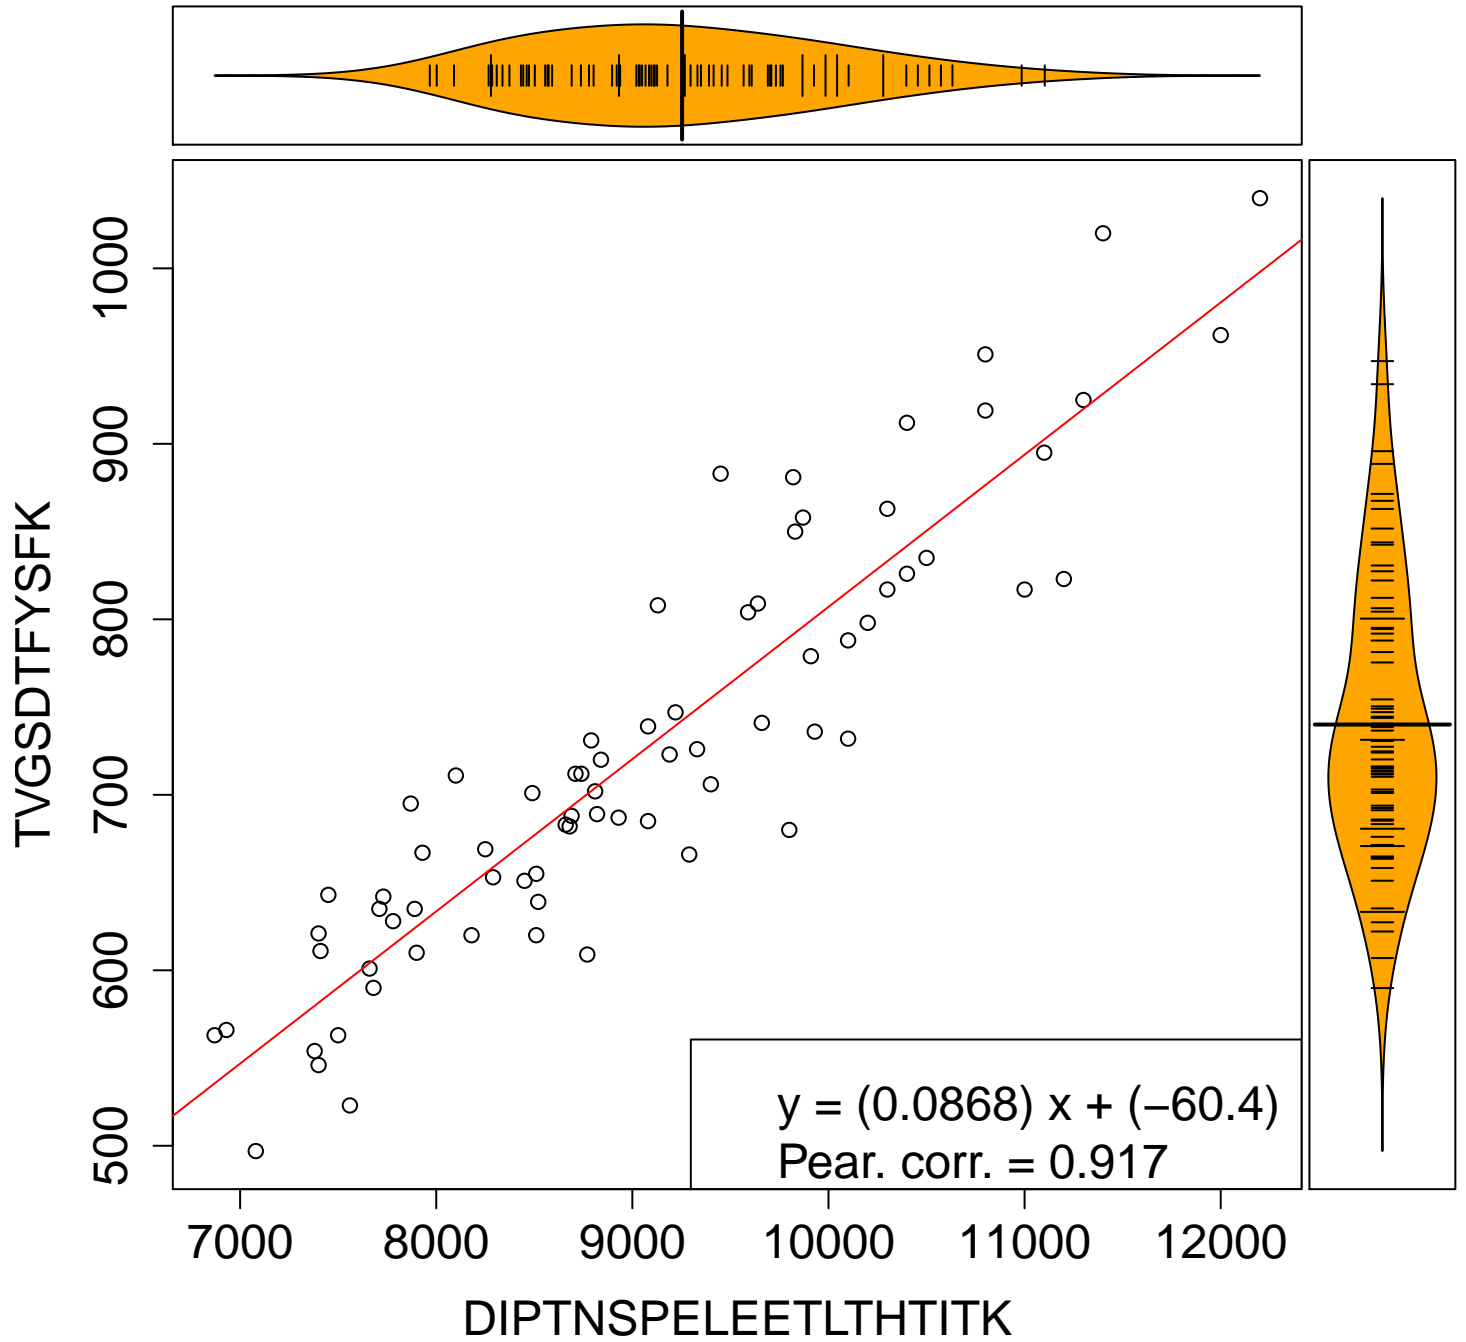

# Plasma serine protease inhibitor

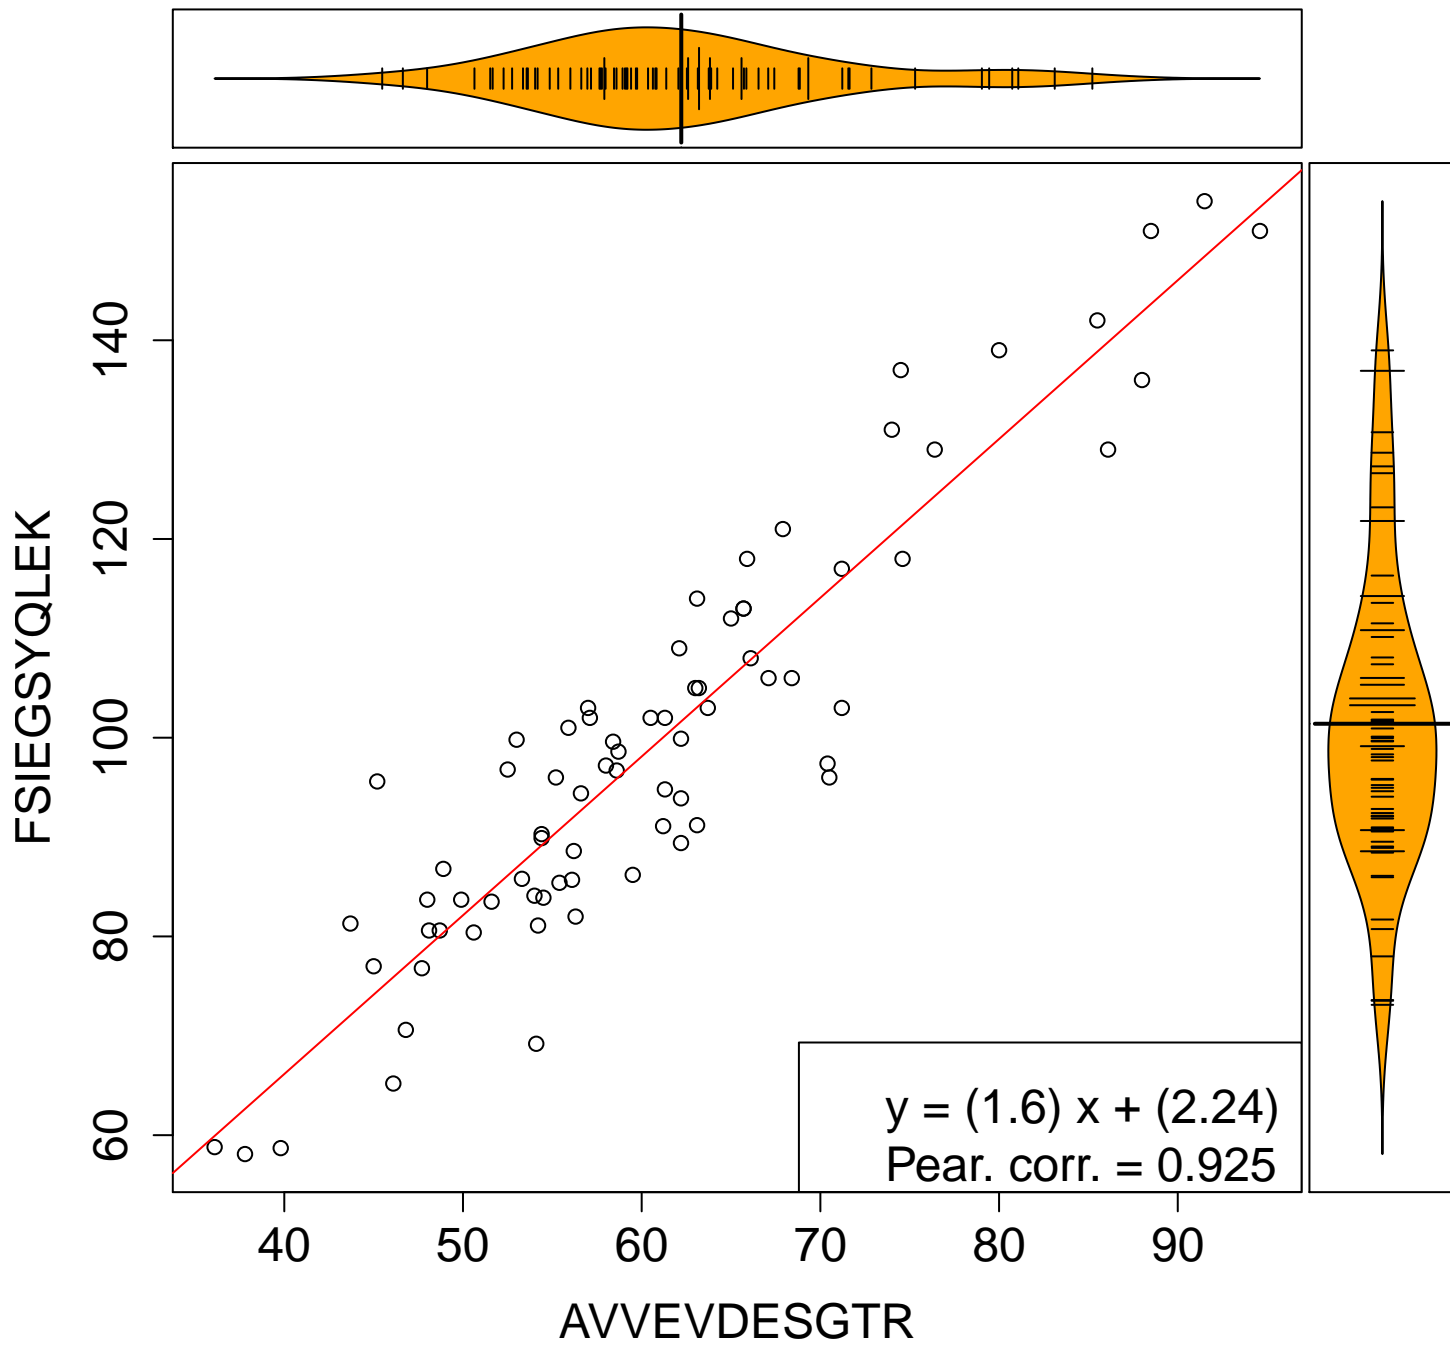



# Plasma serine protease inhibitor

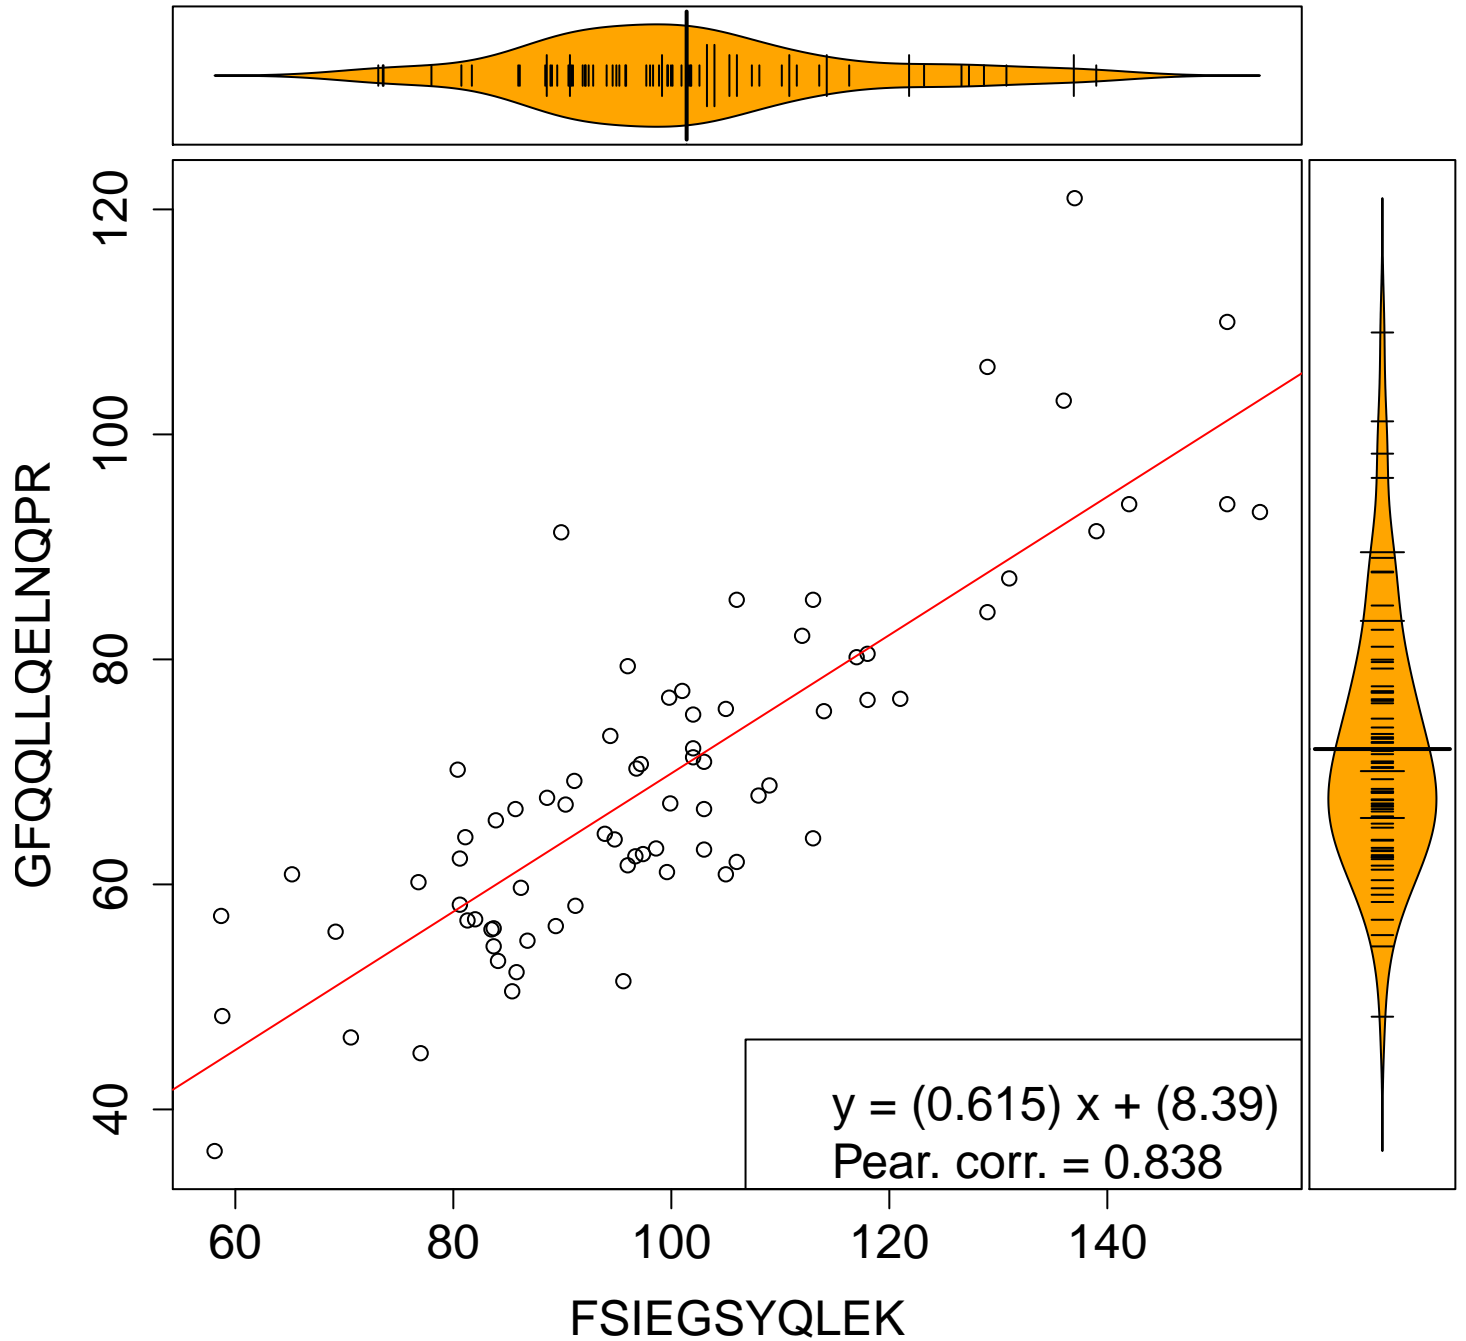

# Vitamin K-dependent protein S

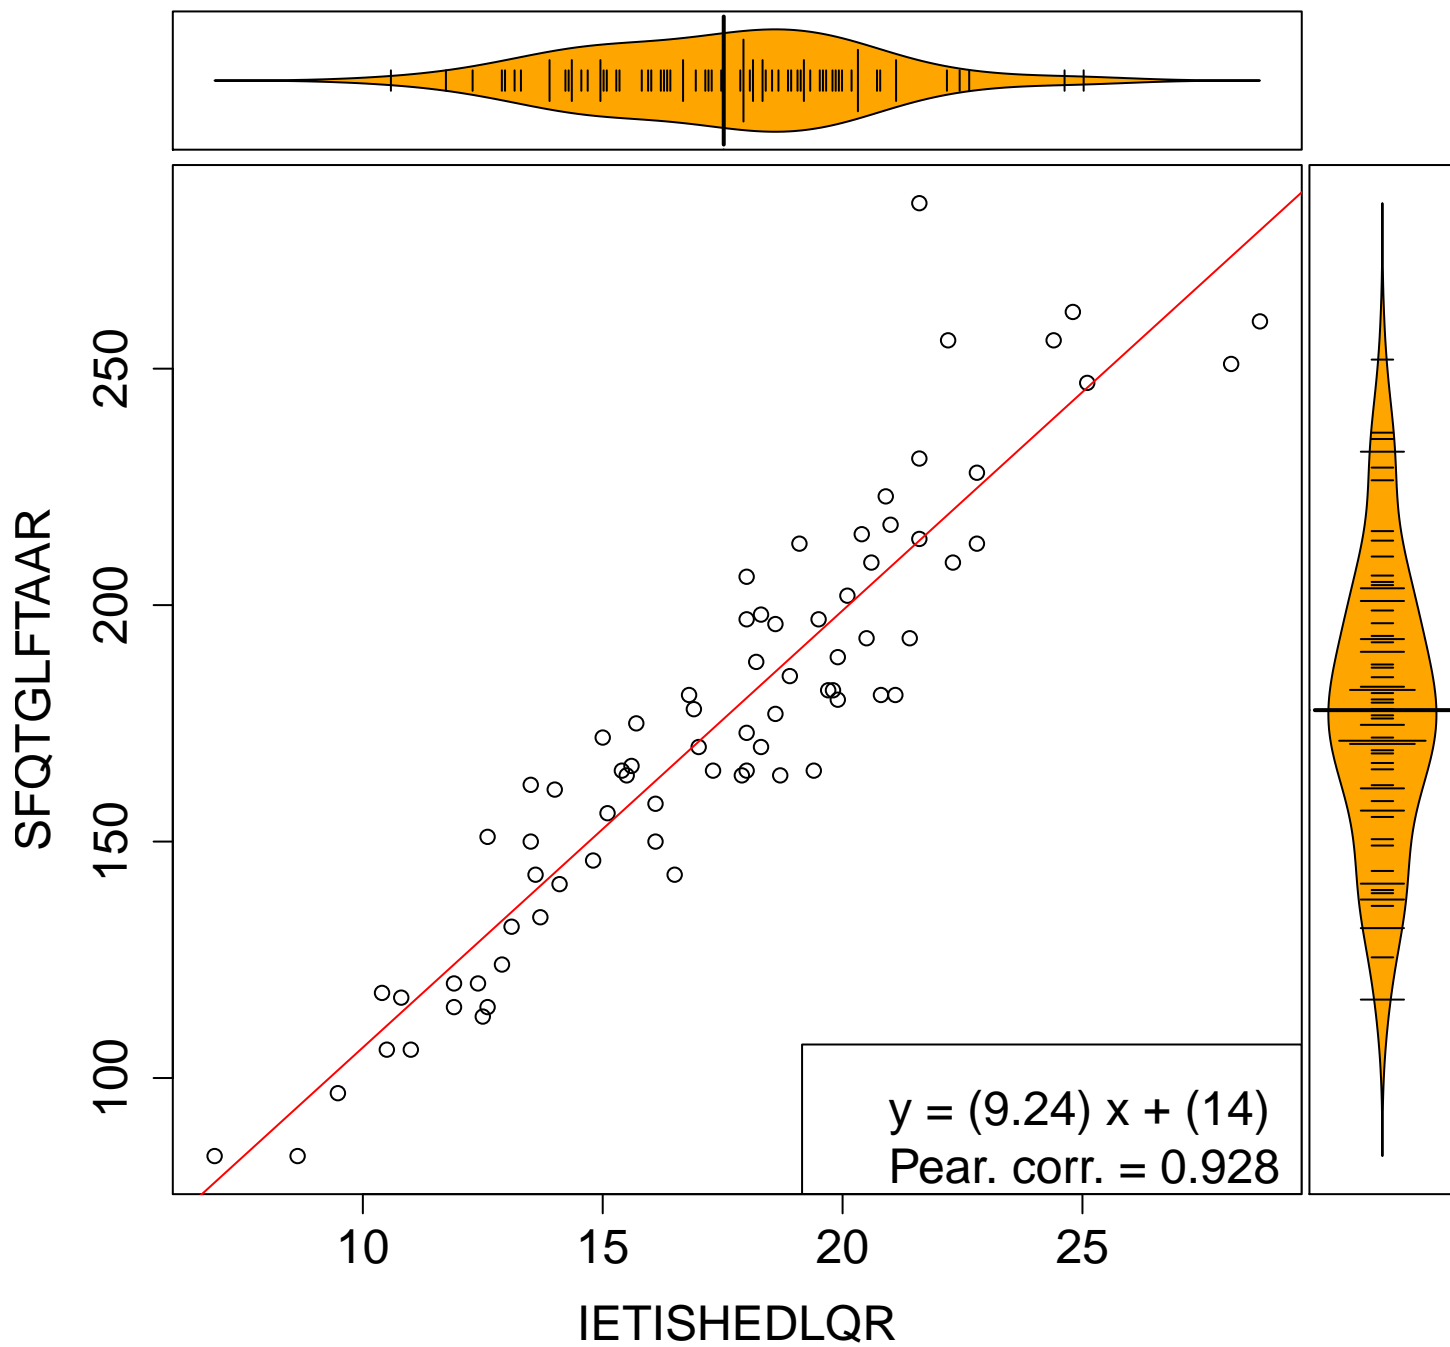

# Vitamin K-dependent protein S

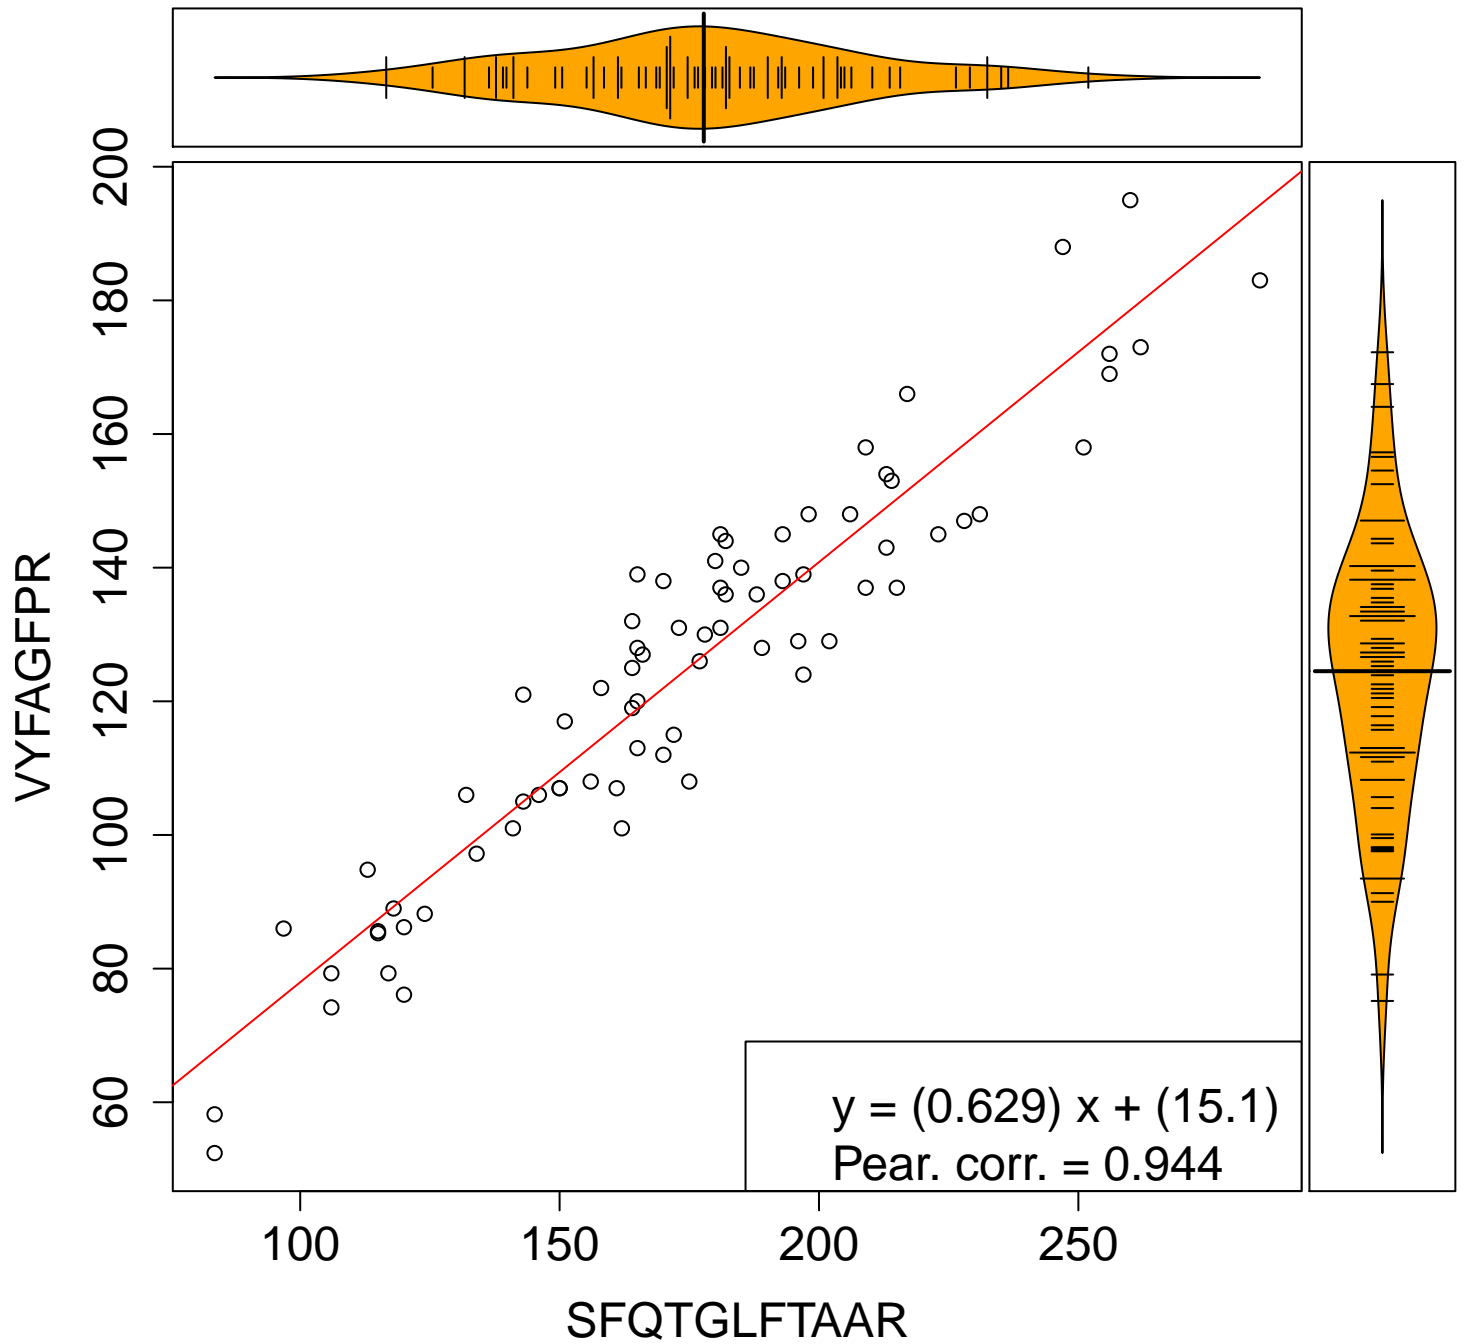

# Protein Z-dependent protease inhibitor

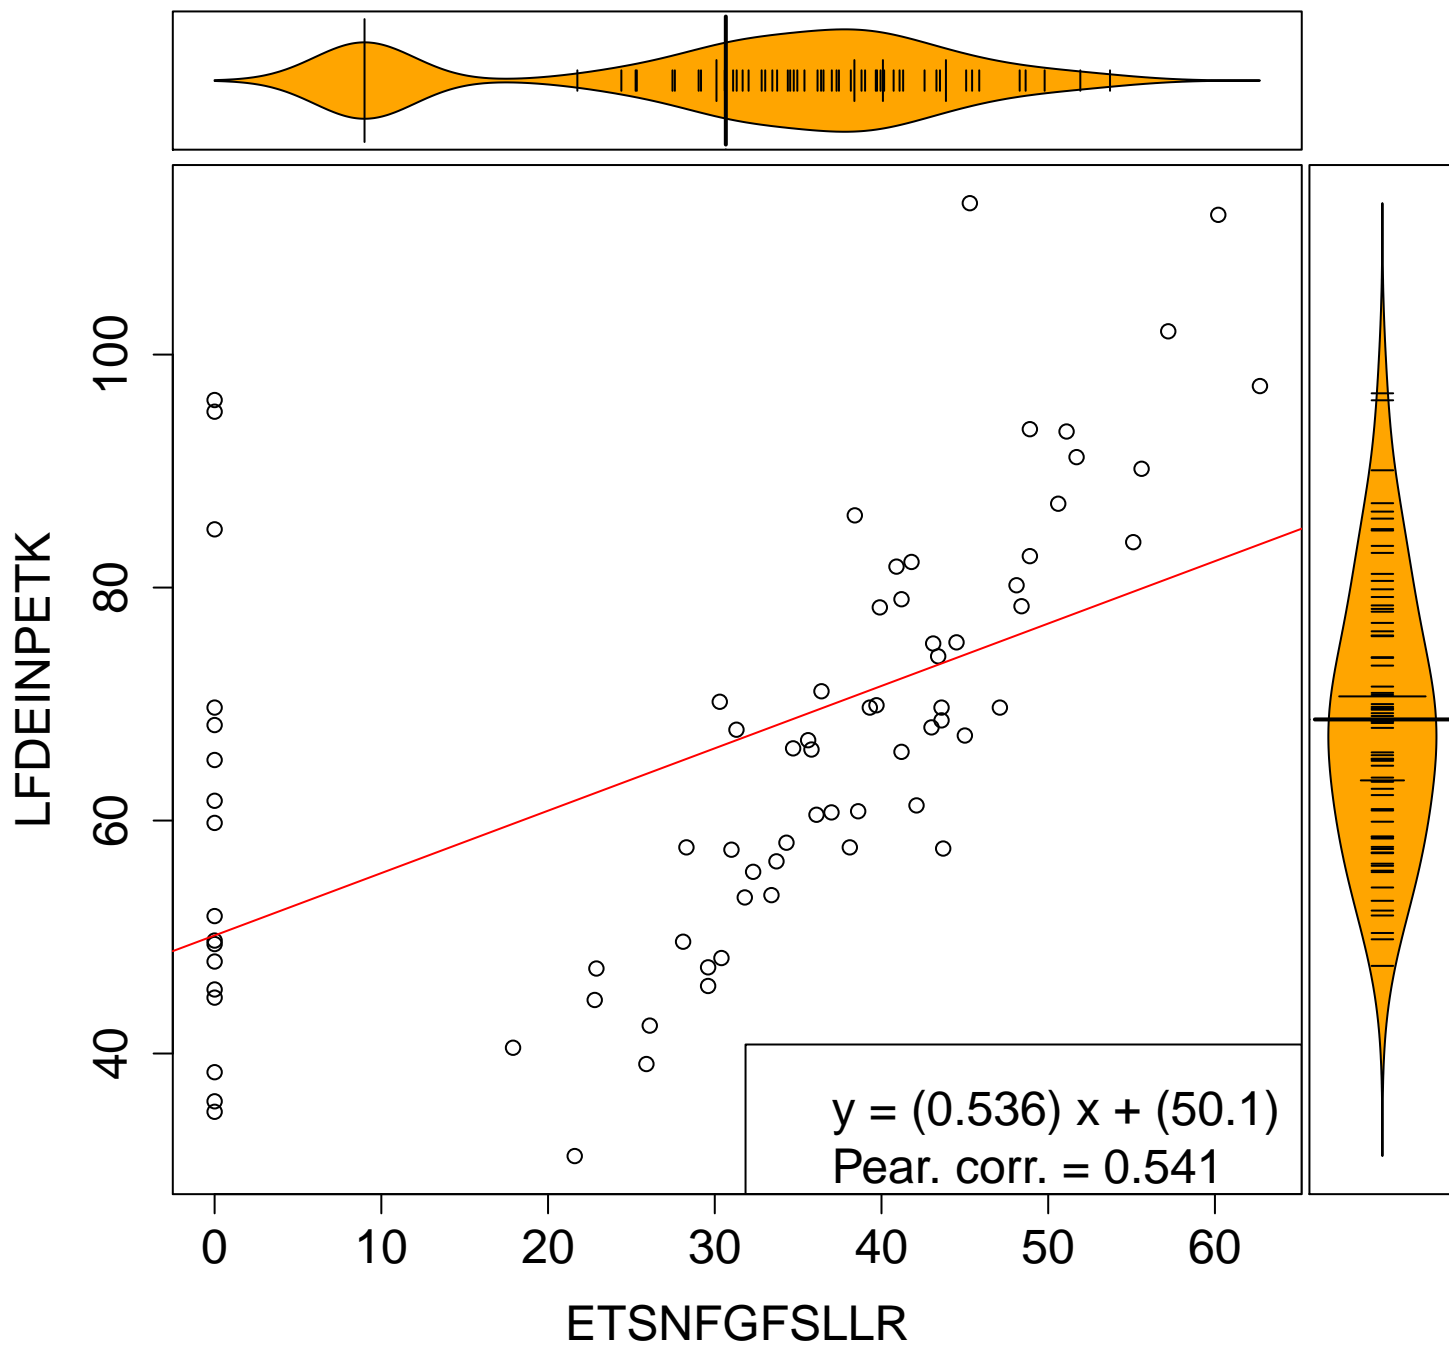

# Protein Z-dependent protease inhibitor

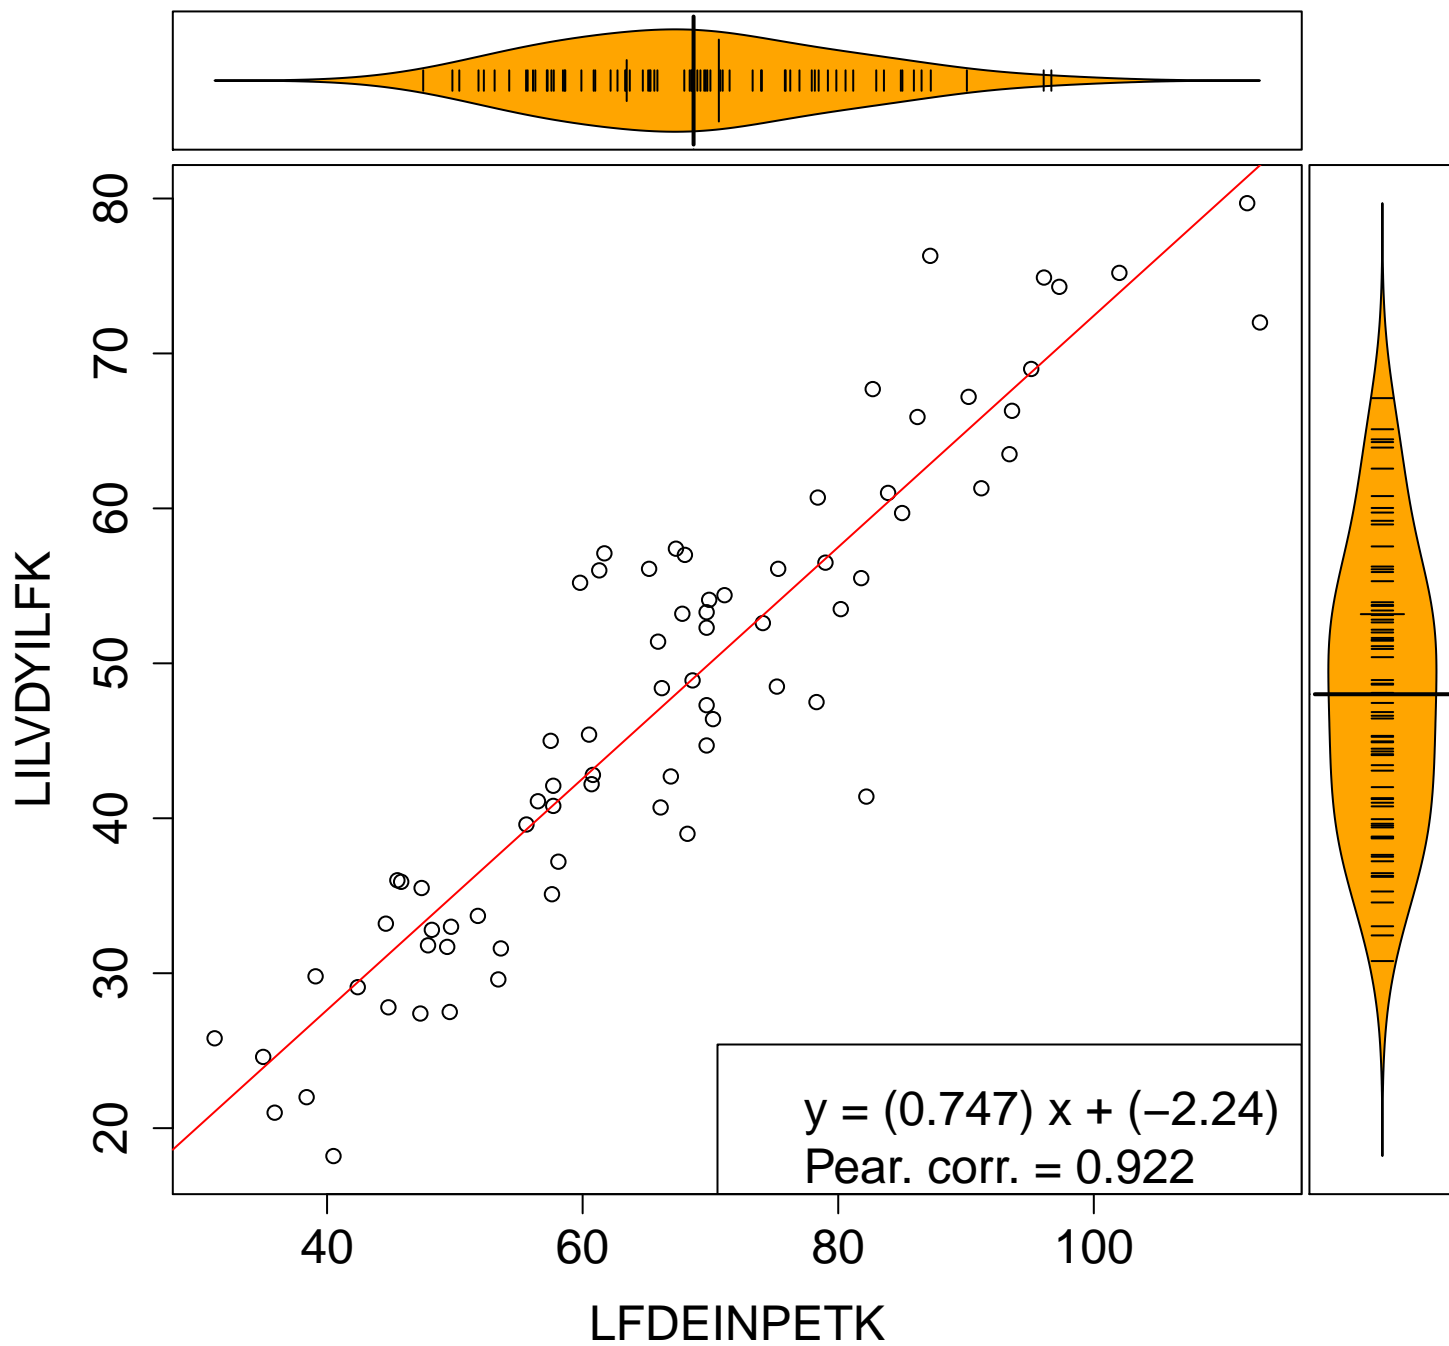

# Prothrombin

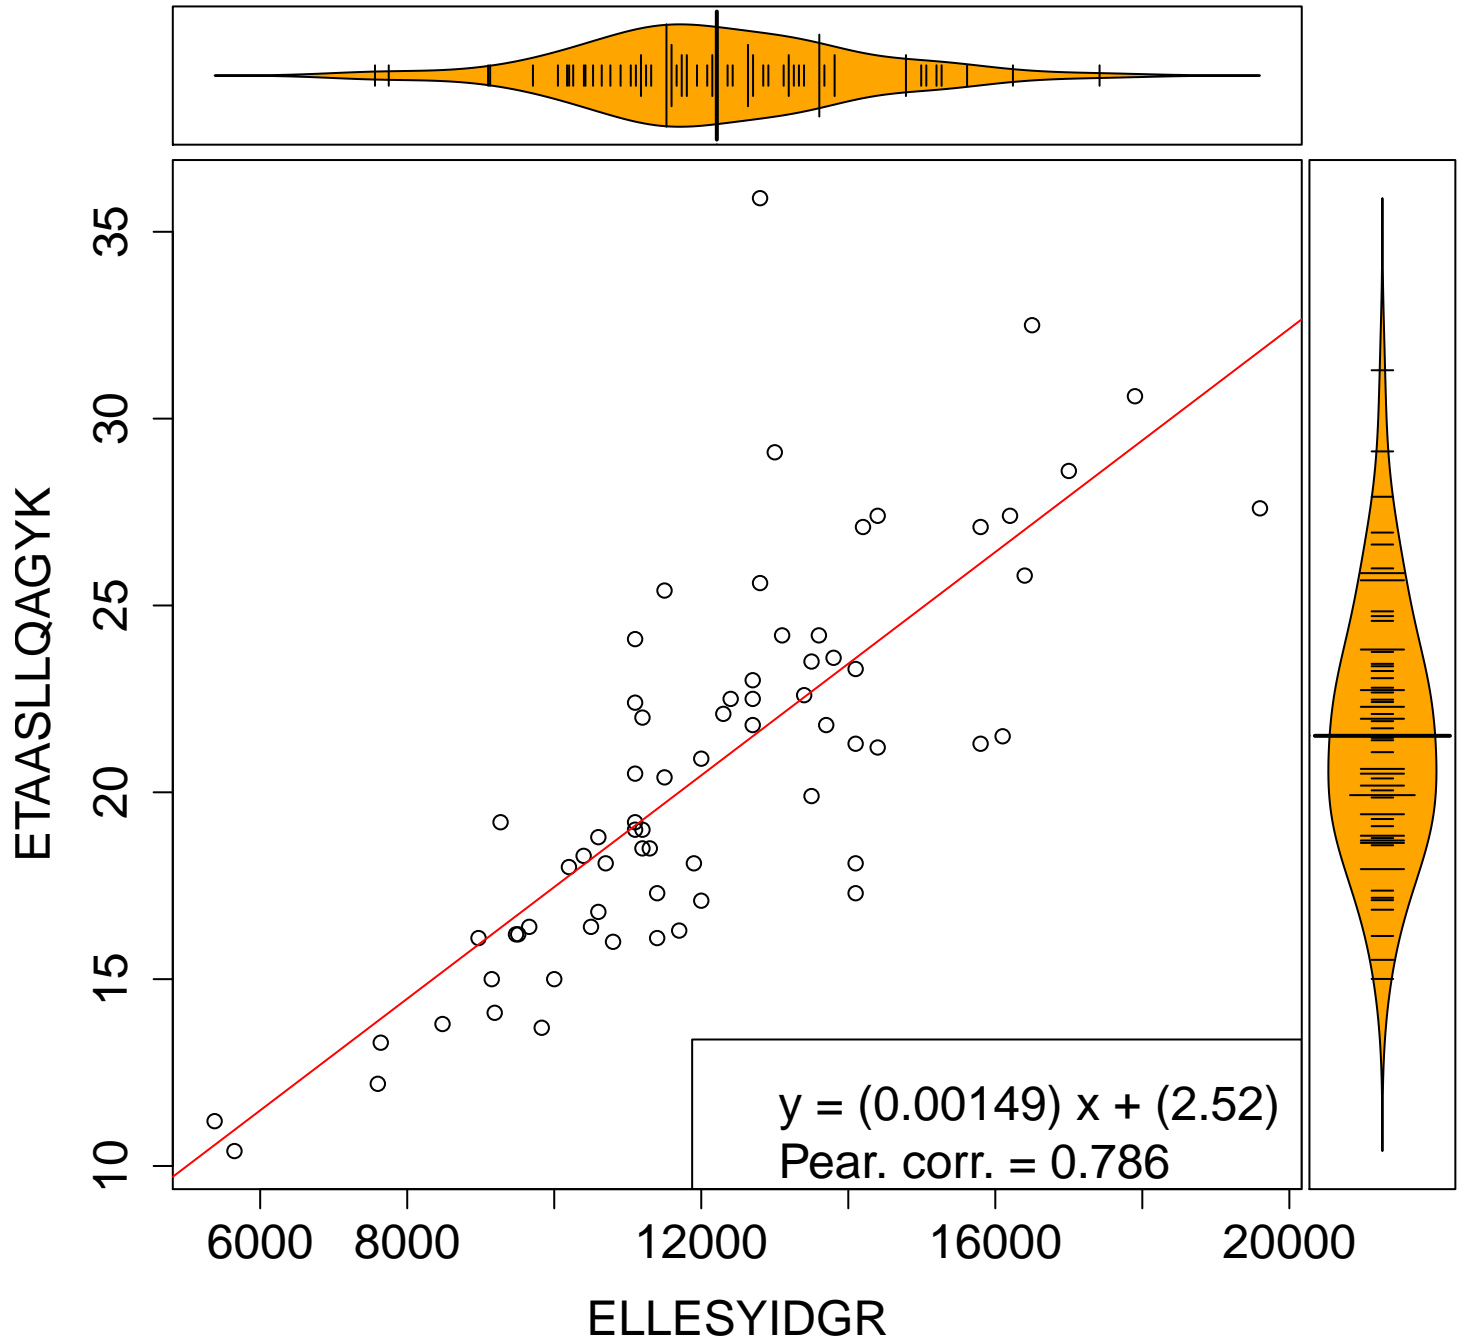

# Prothrombin

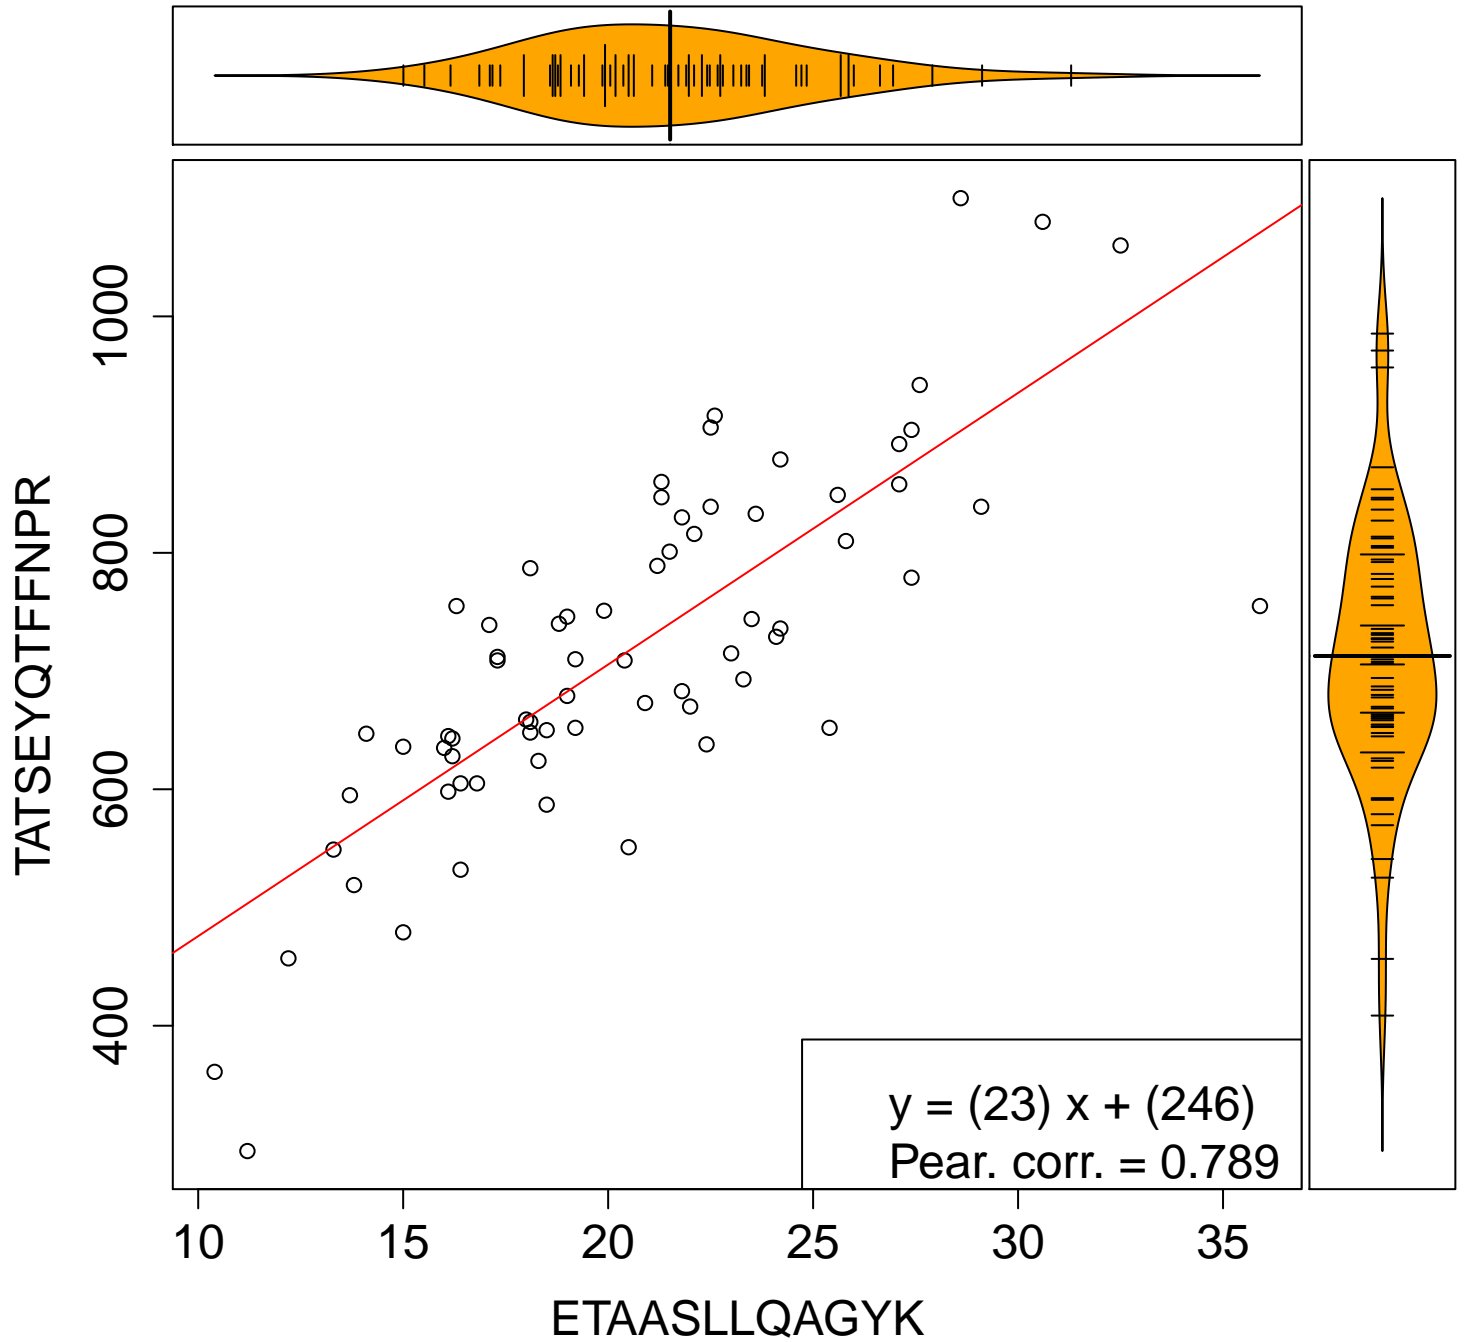

# Prothrombin, P00734

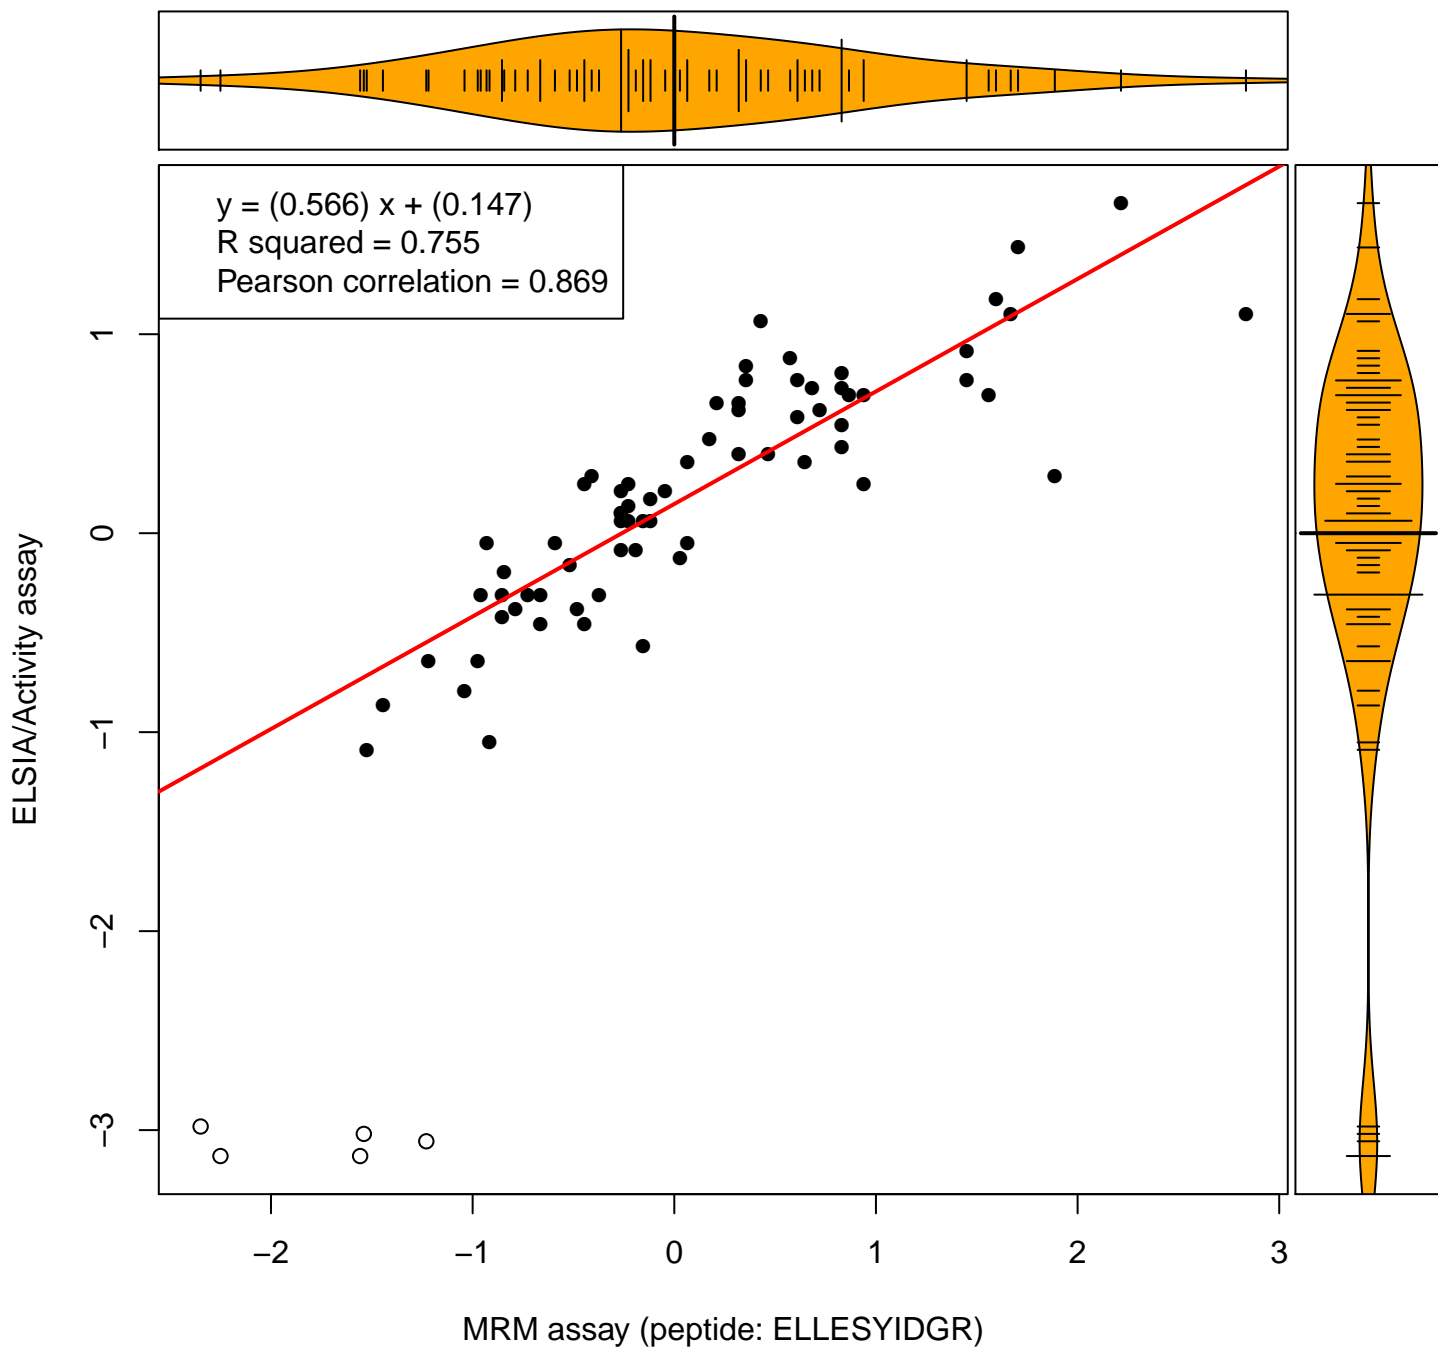



# Prothrombin, P00734

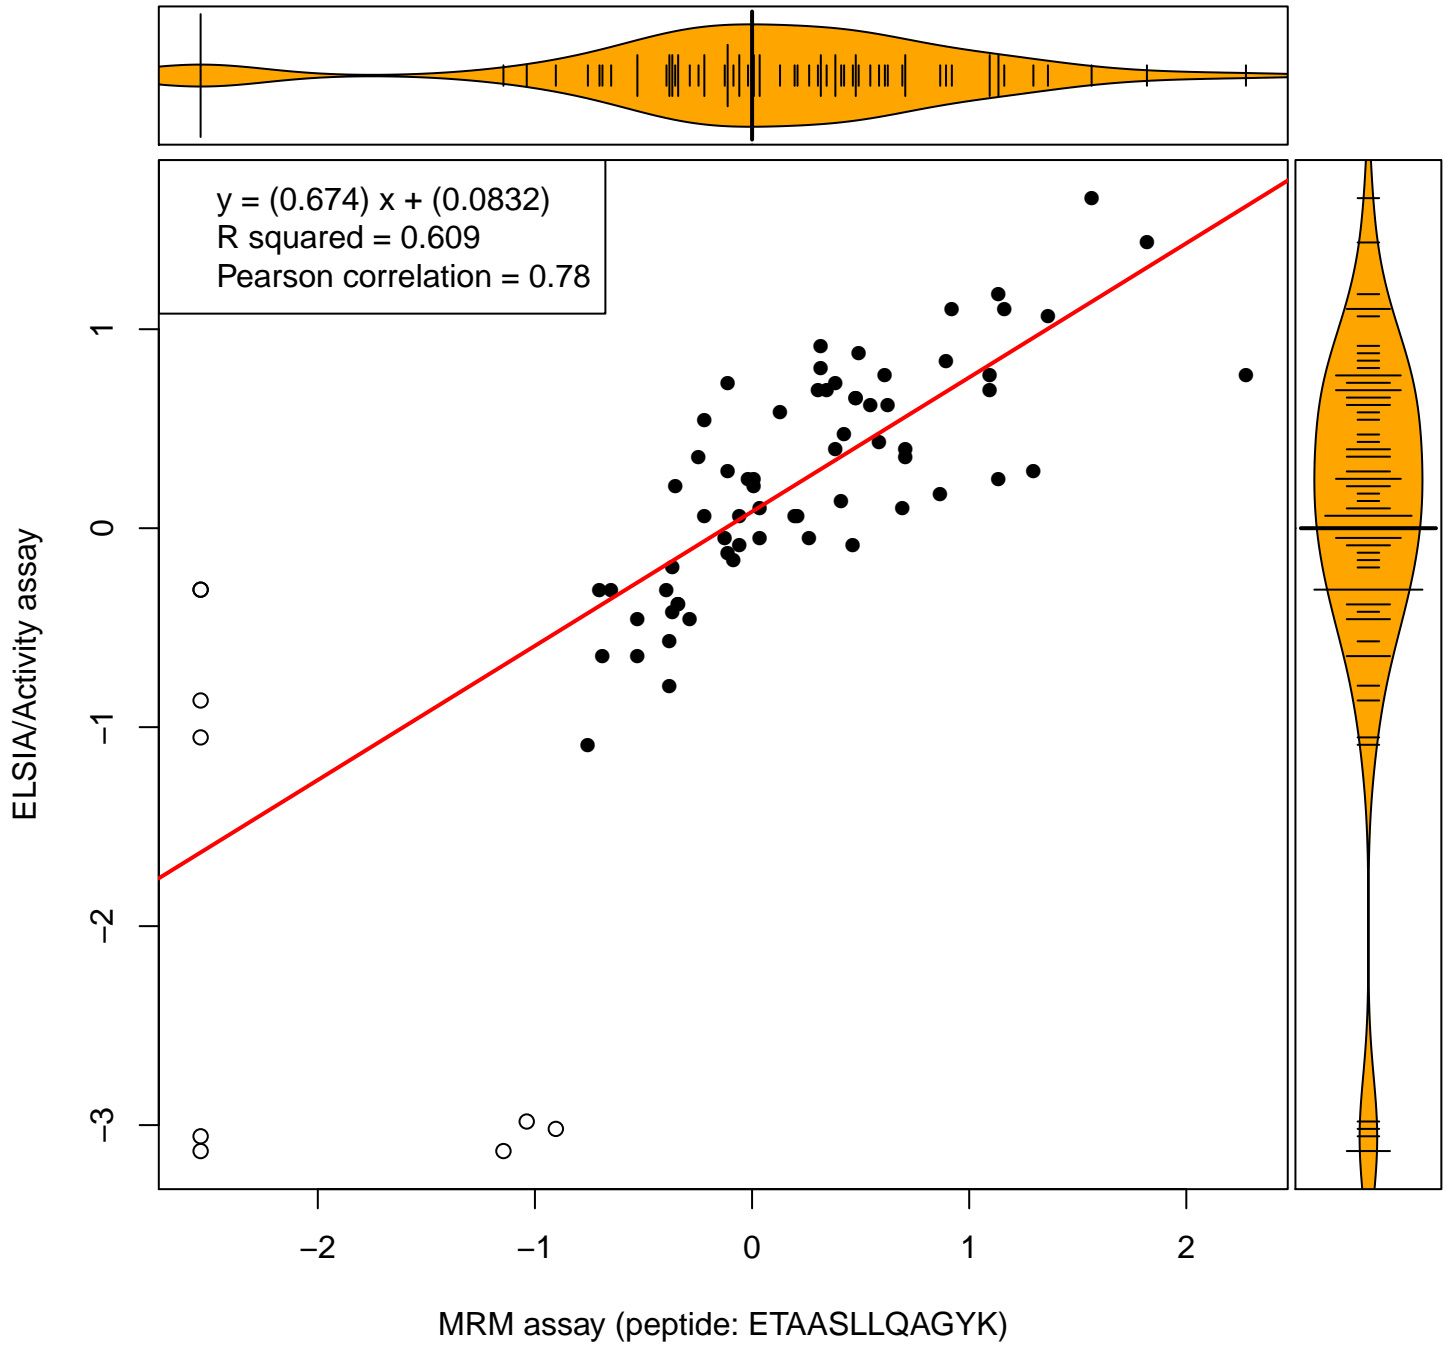

# Prothrombin, P00734

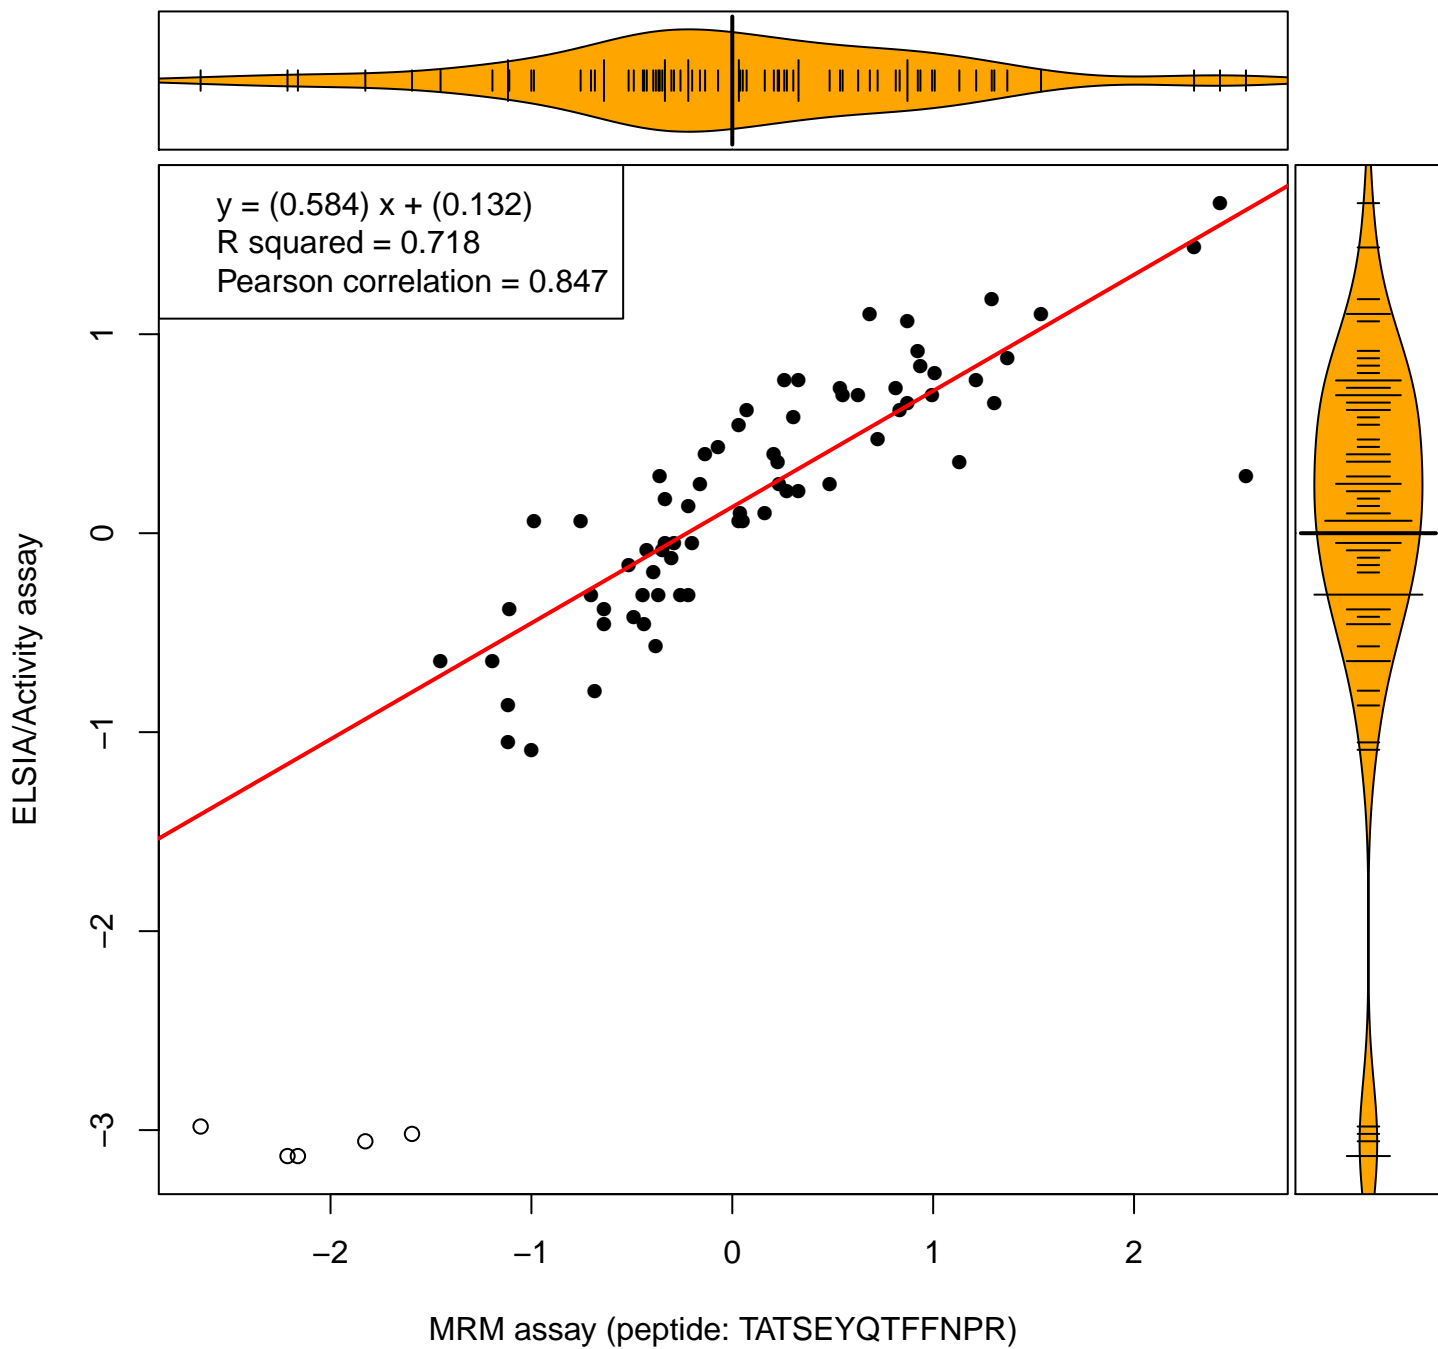

# Coagulation factor VII, P08709

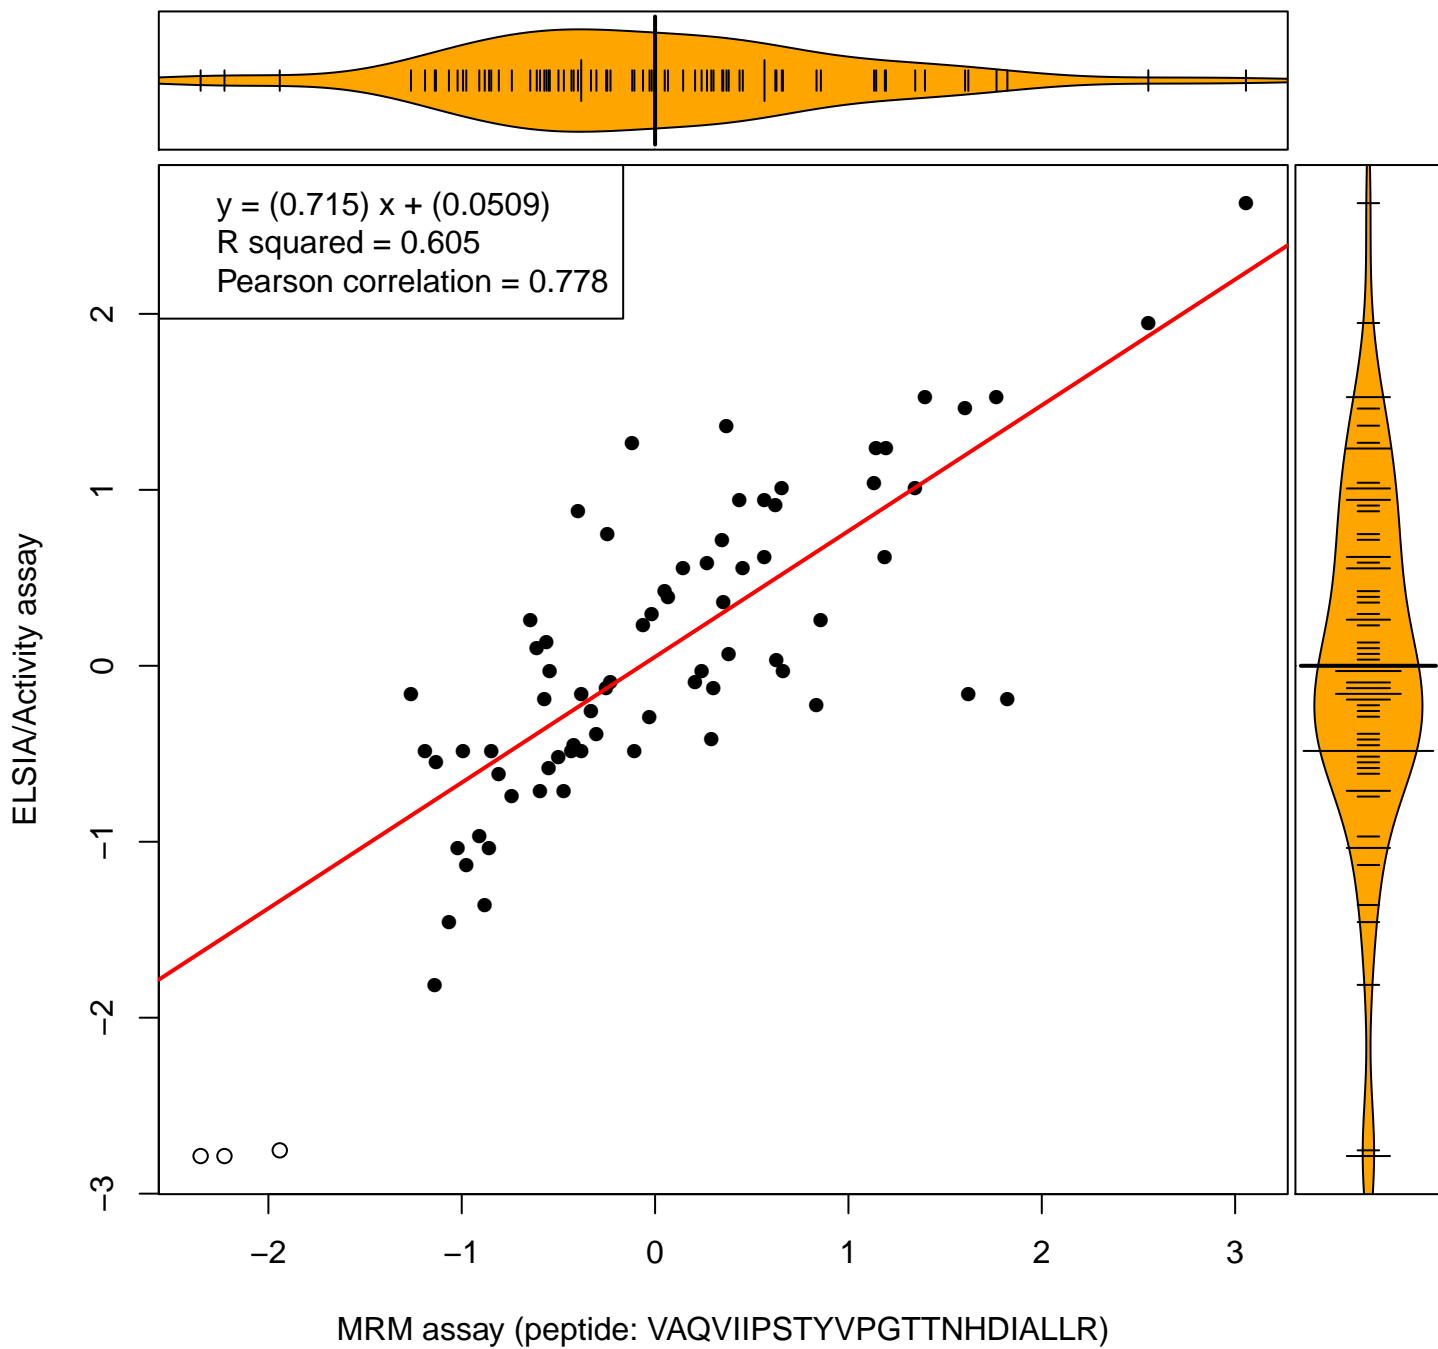

# Coagulation factor IX, P00740

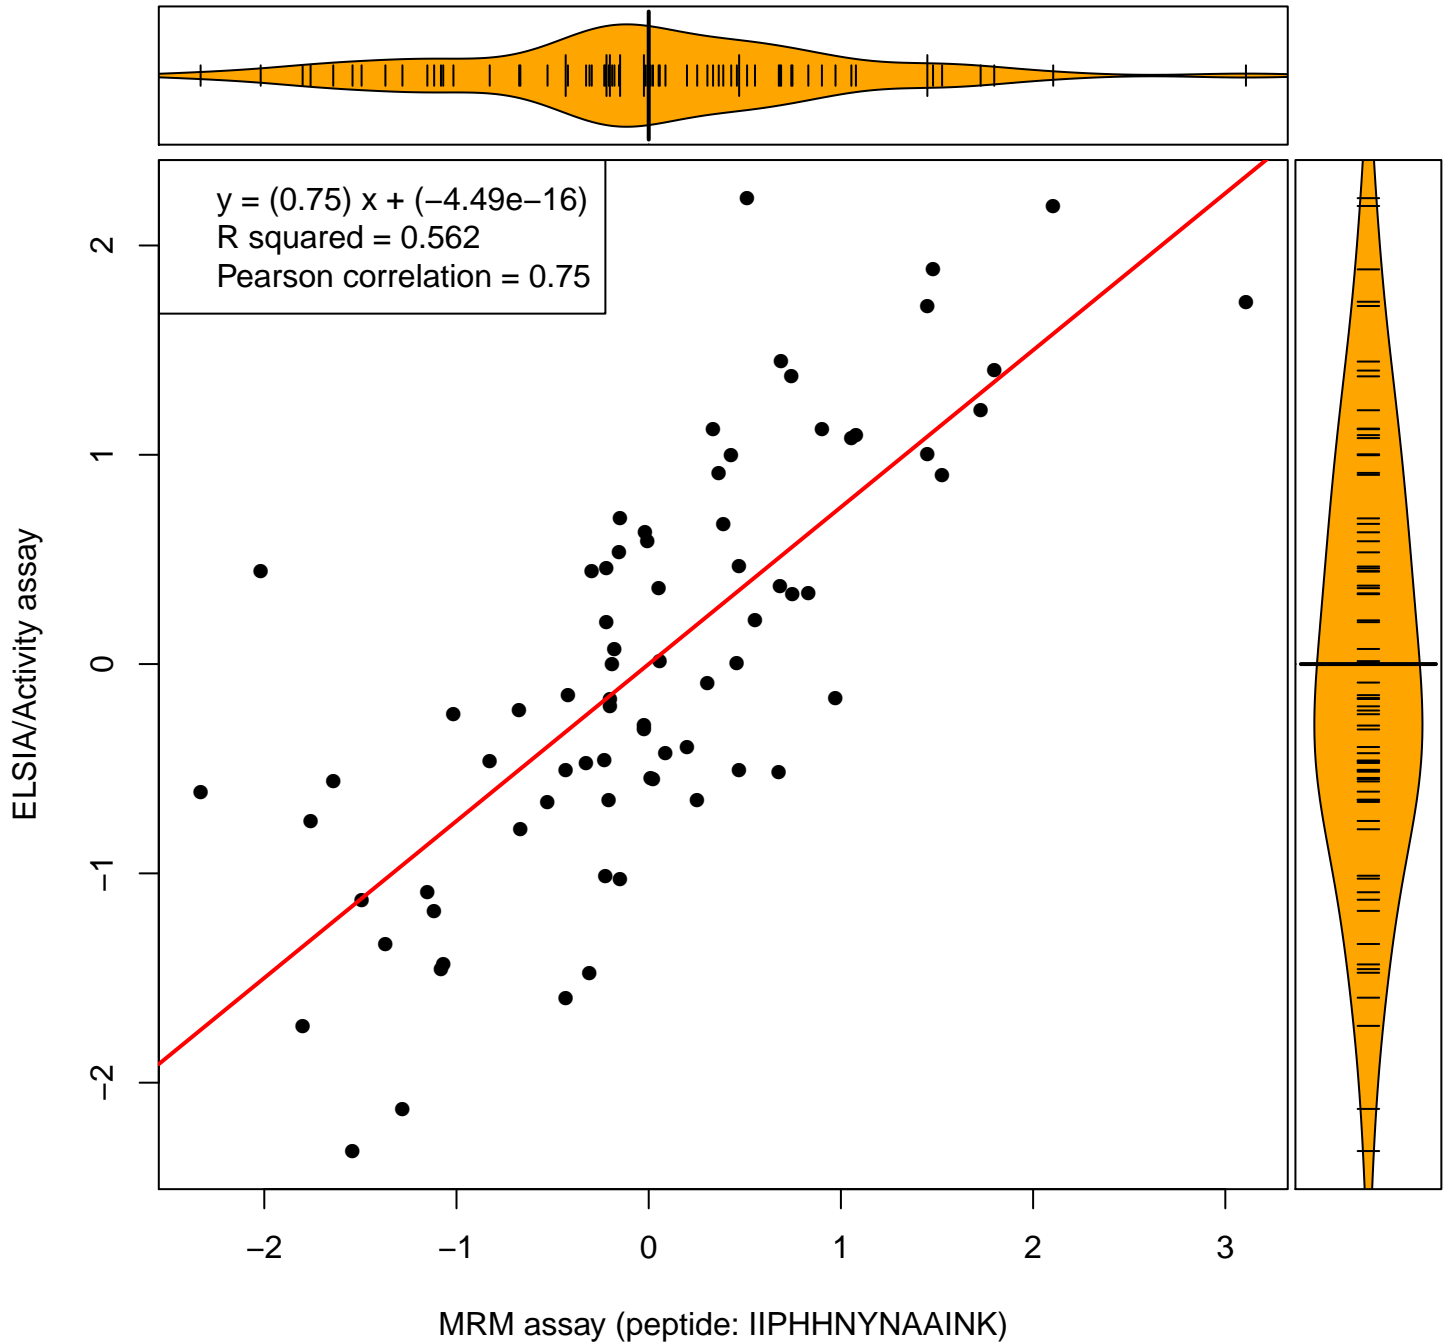

# Coagulation factor IX, P00740

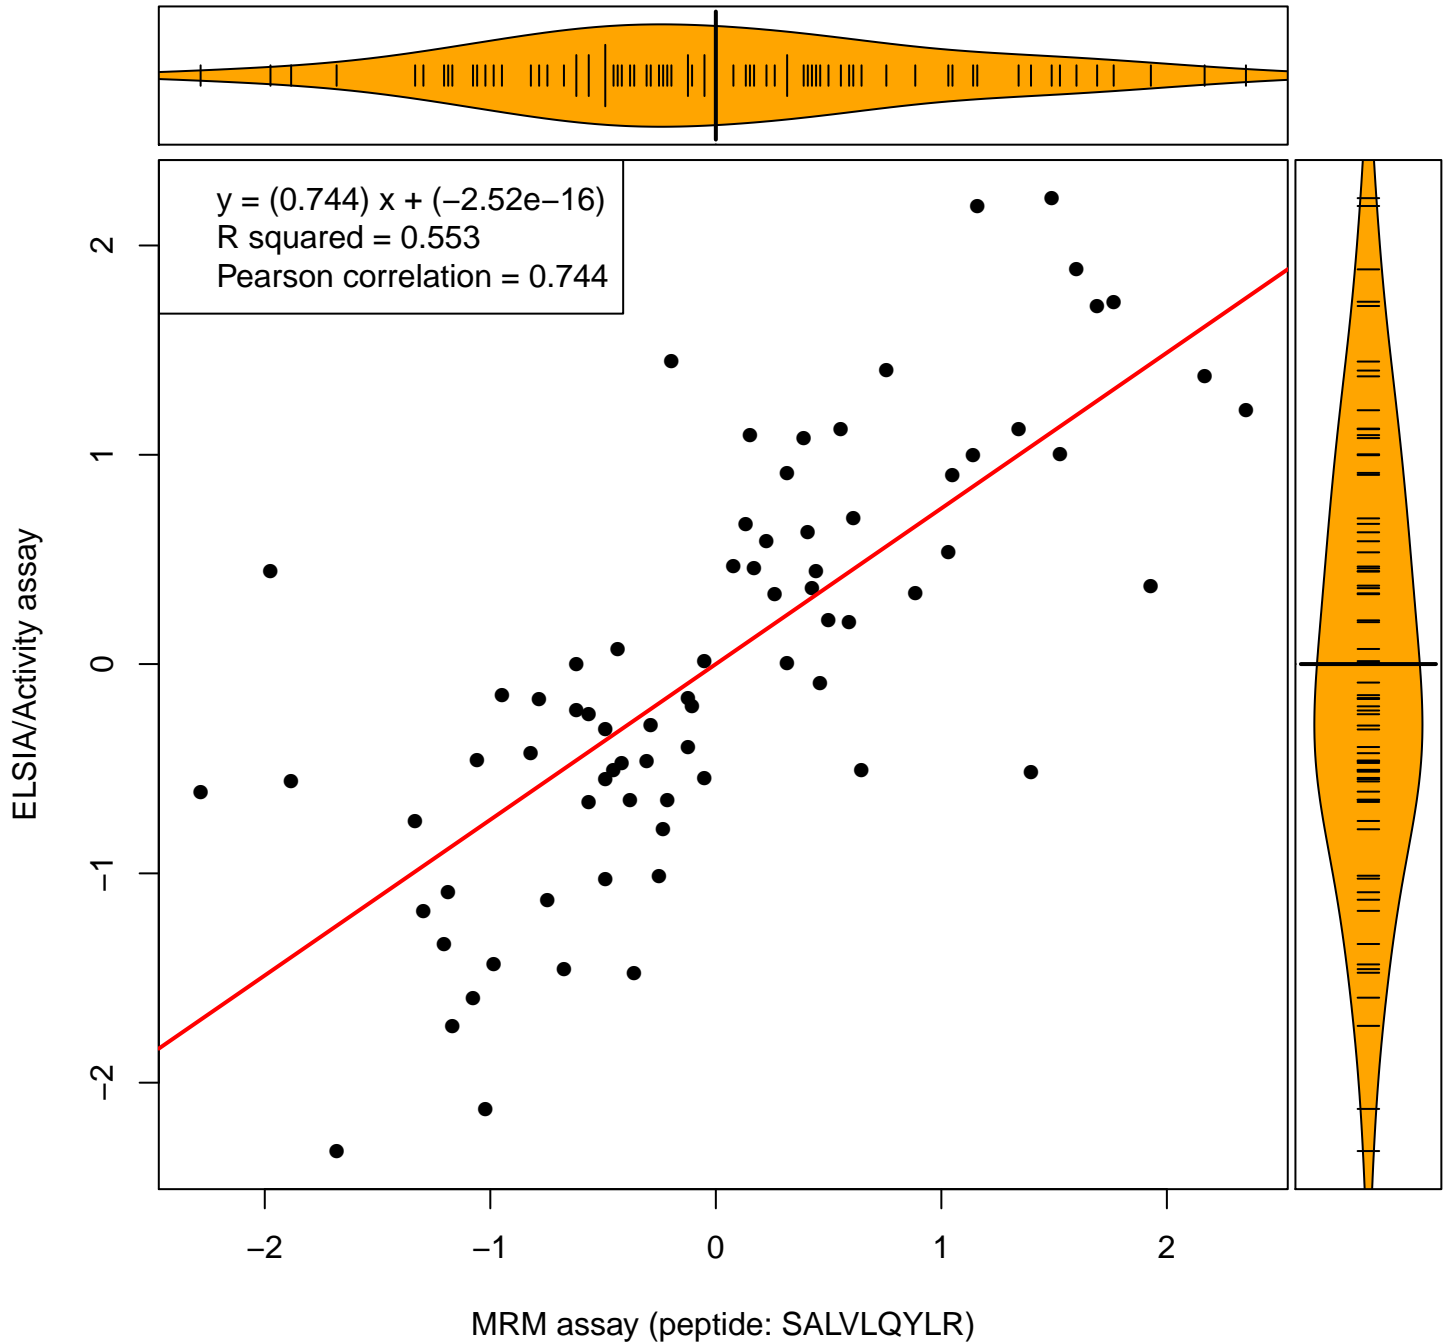

# Coagulation factor IX, P00740

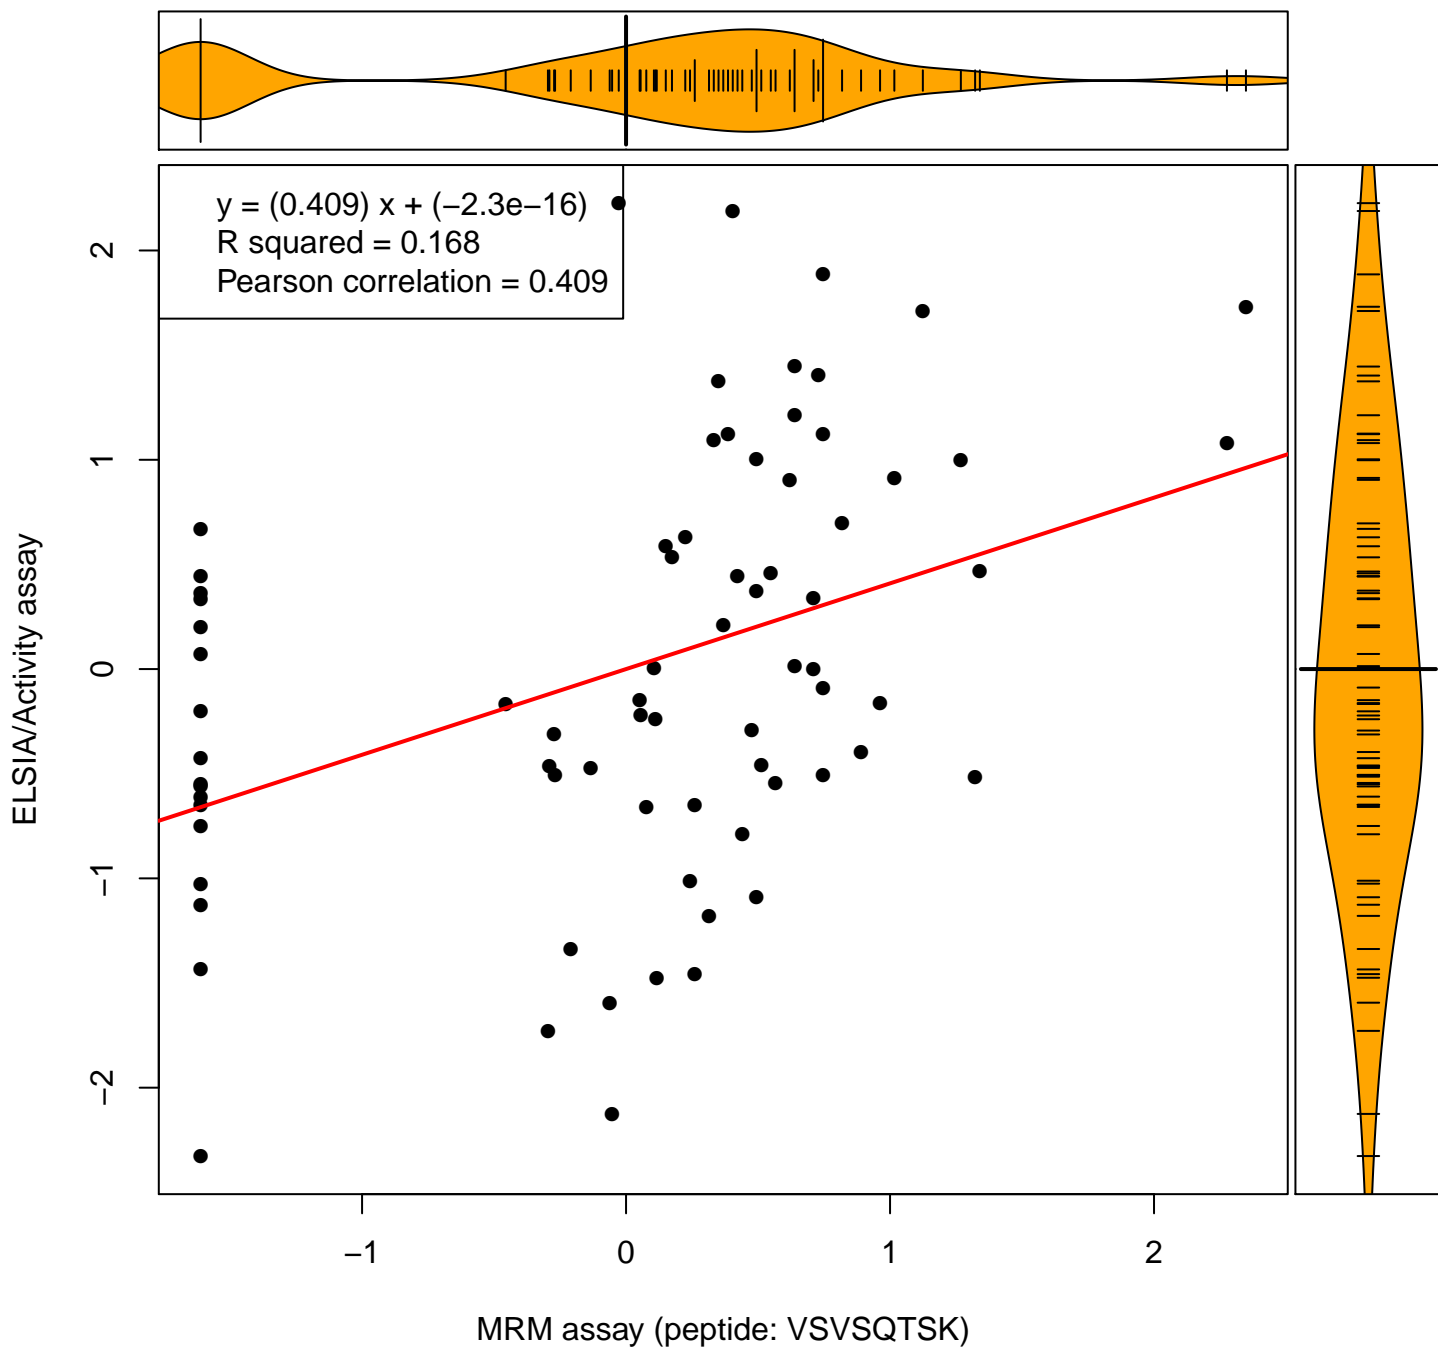

# Coagulation factor X, P00742

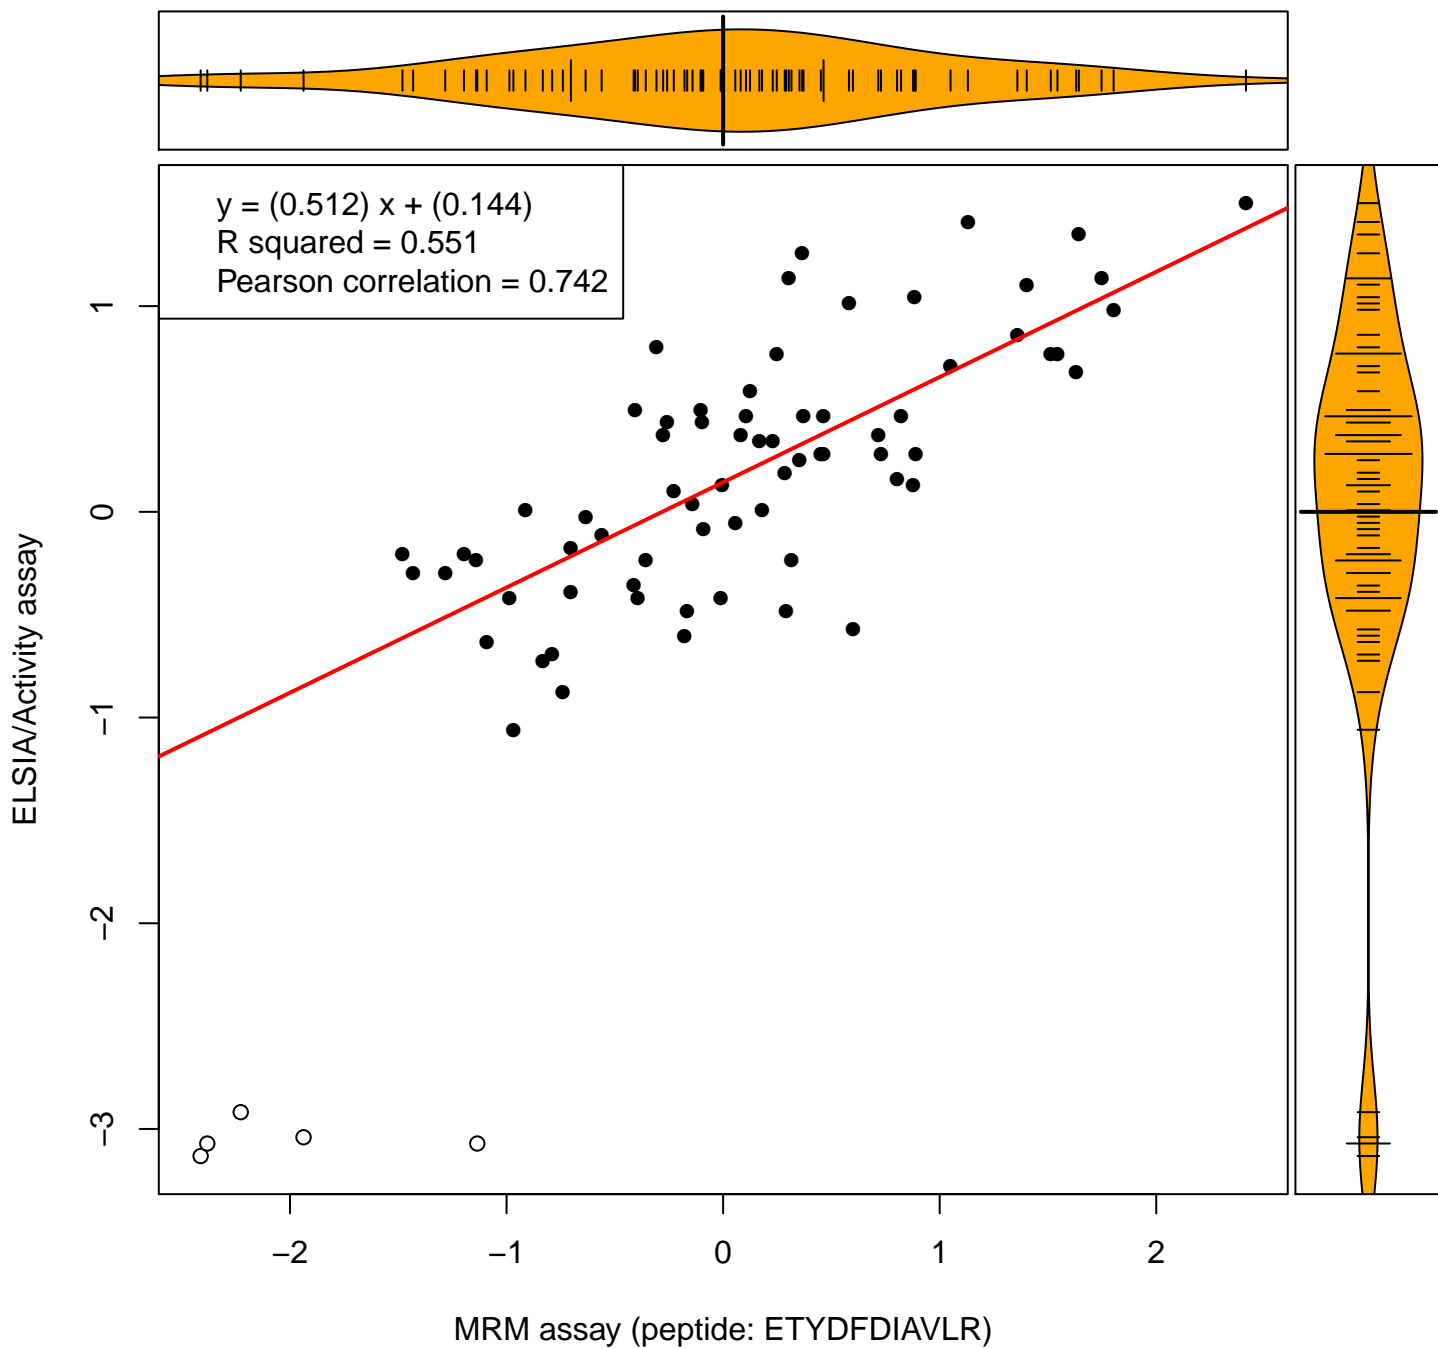

# Coagulation factor X, P00742

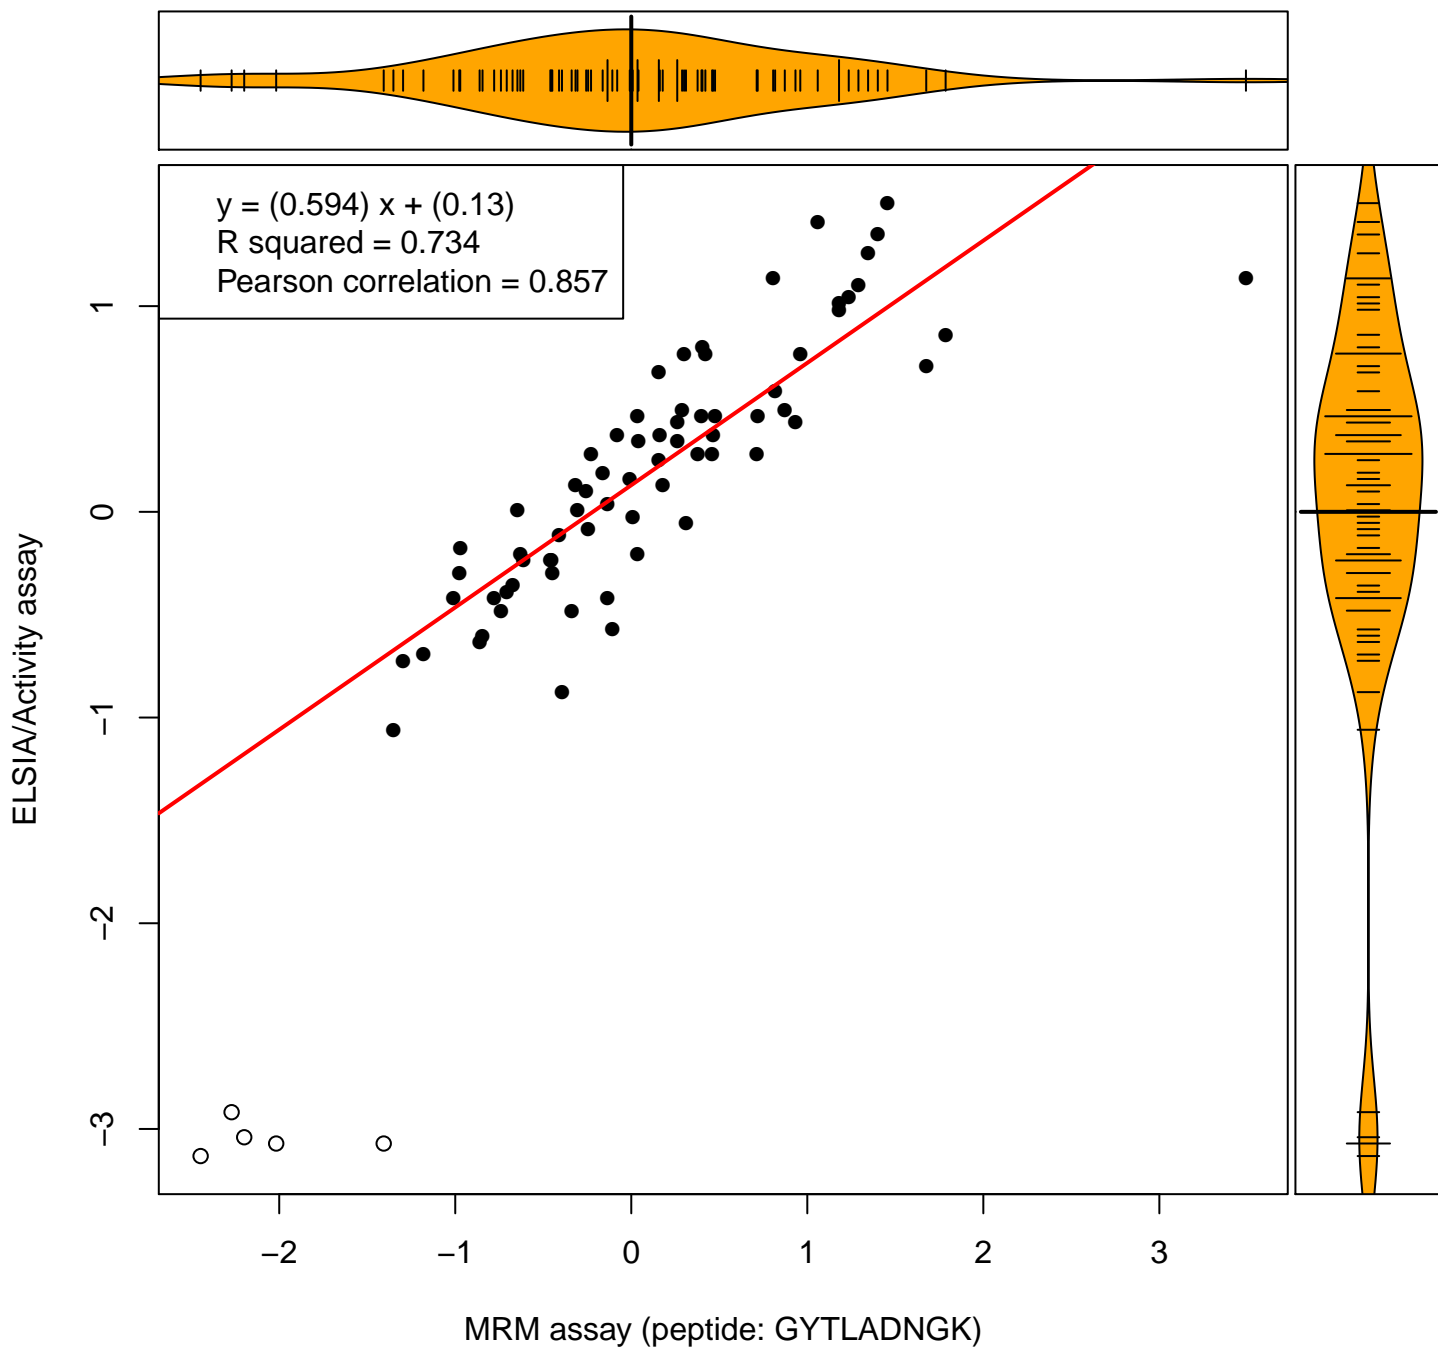



# Coagulation factor X, P00742

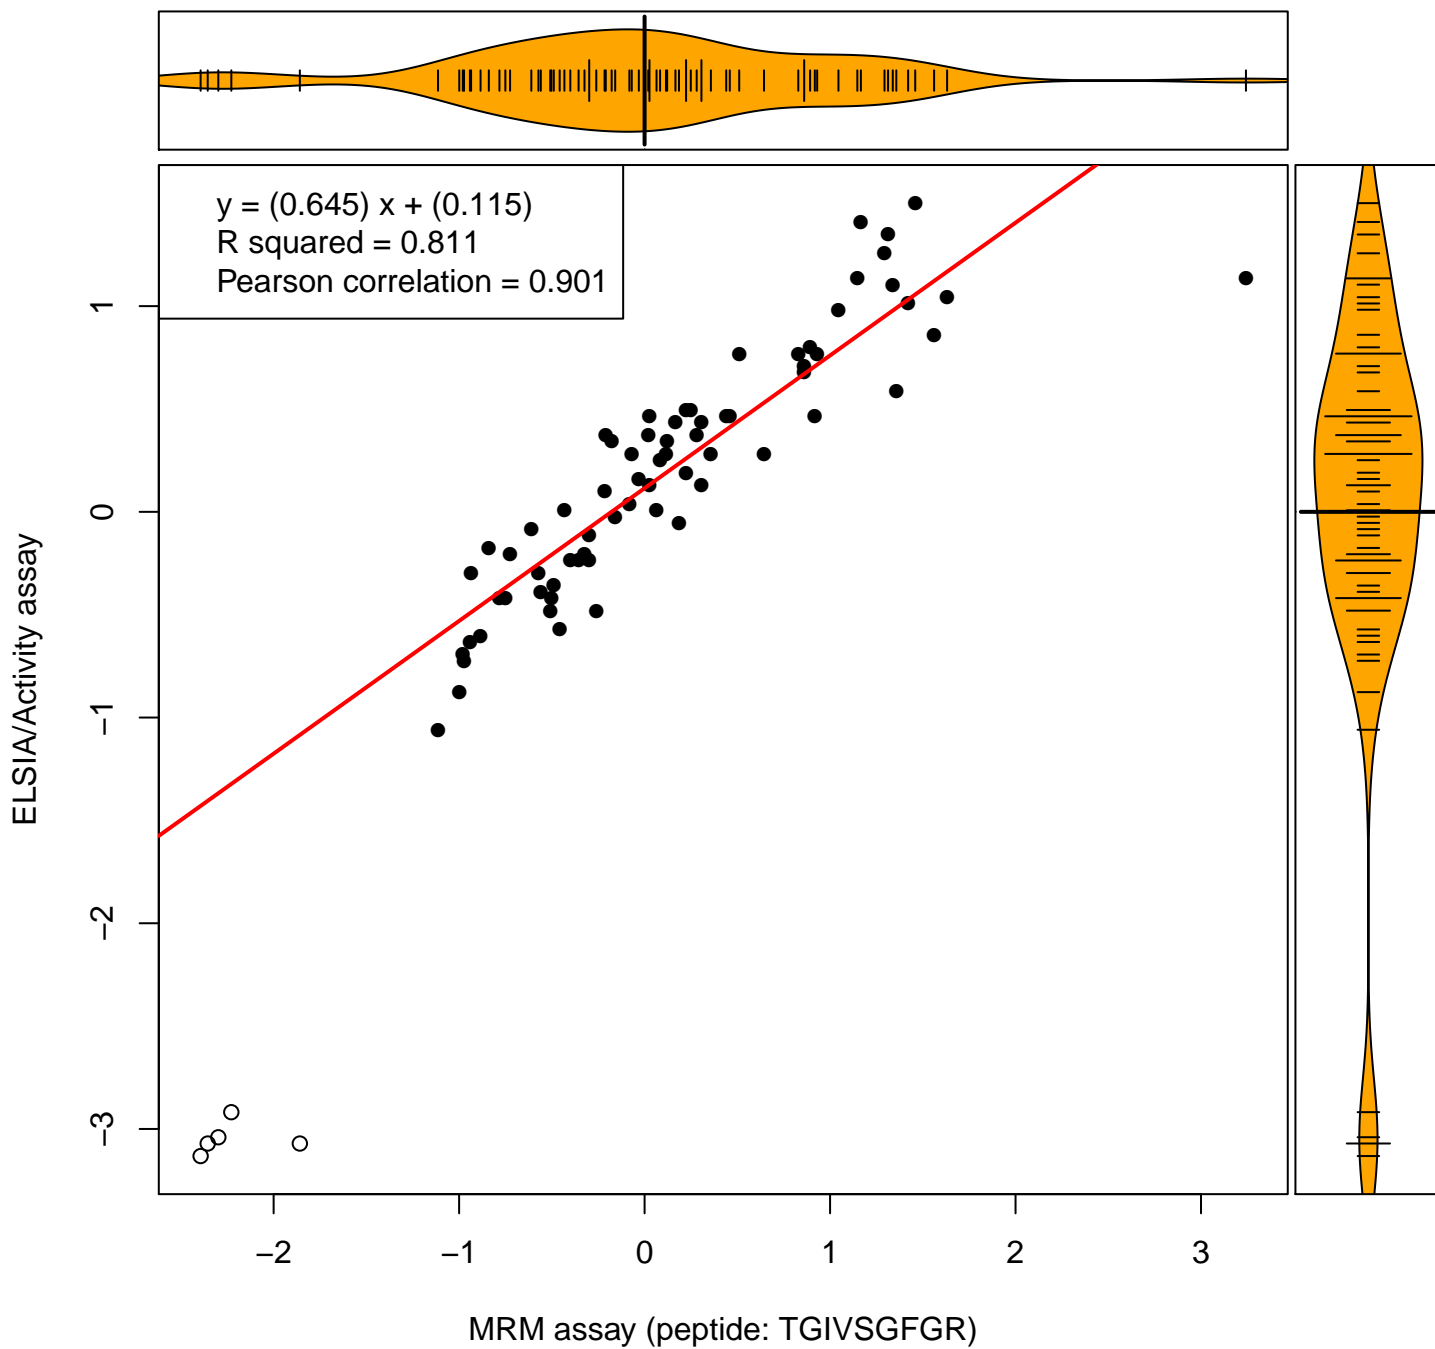

# Fibrinogen alpha chain, P02671

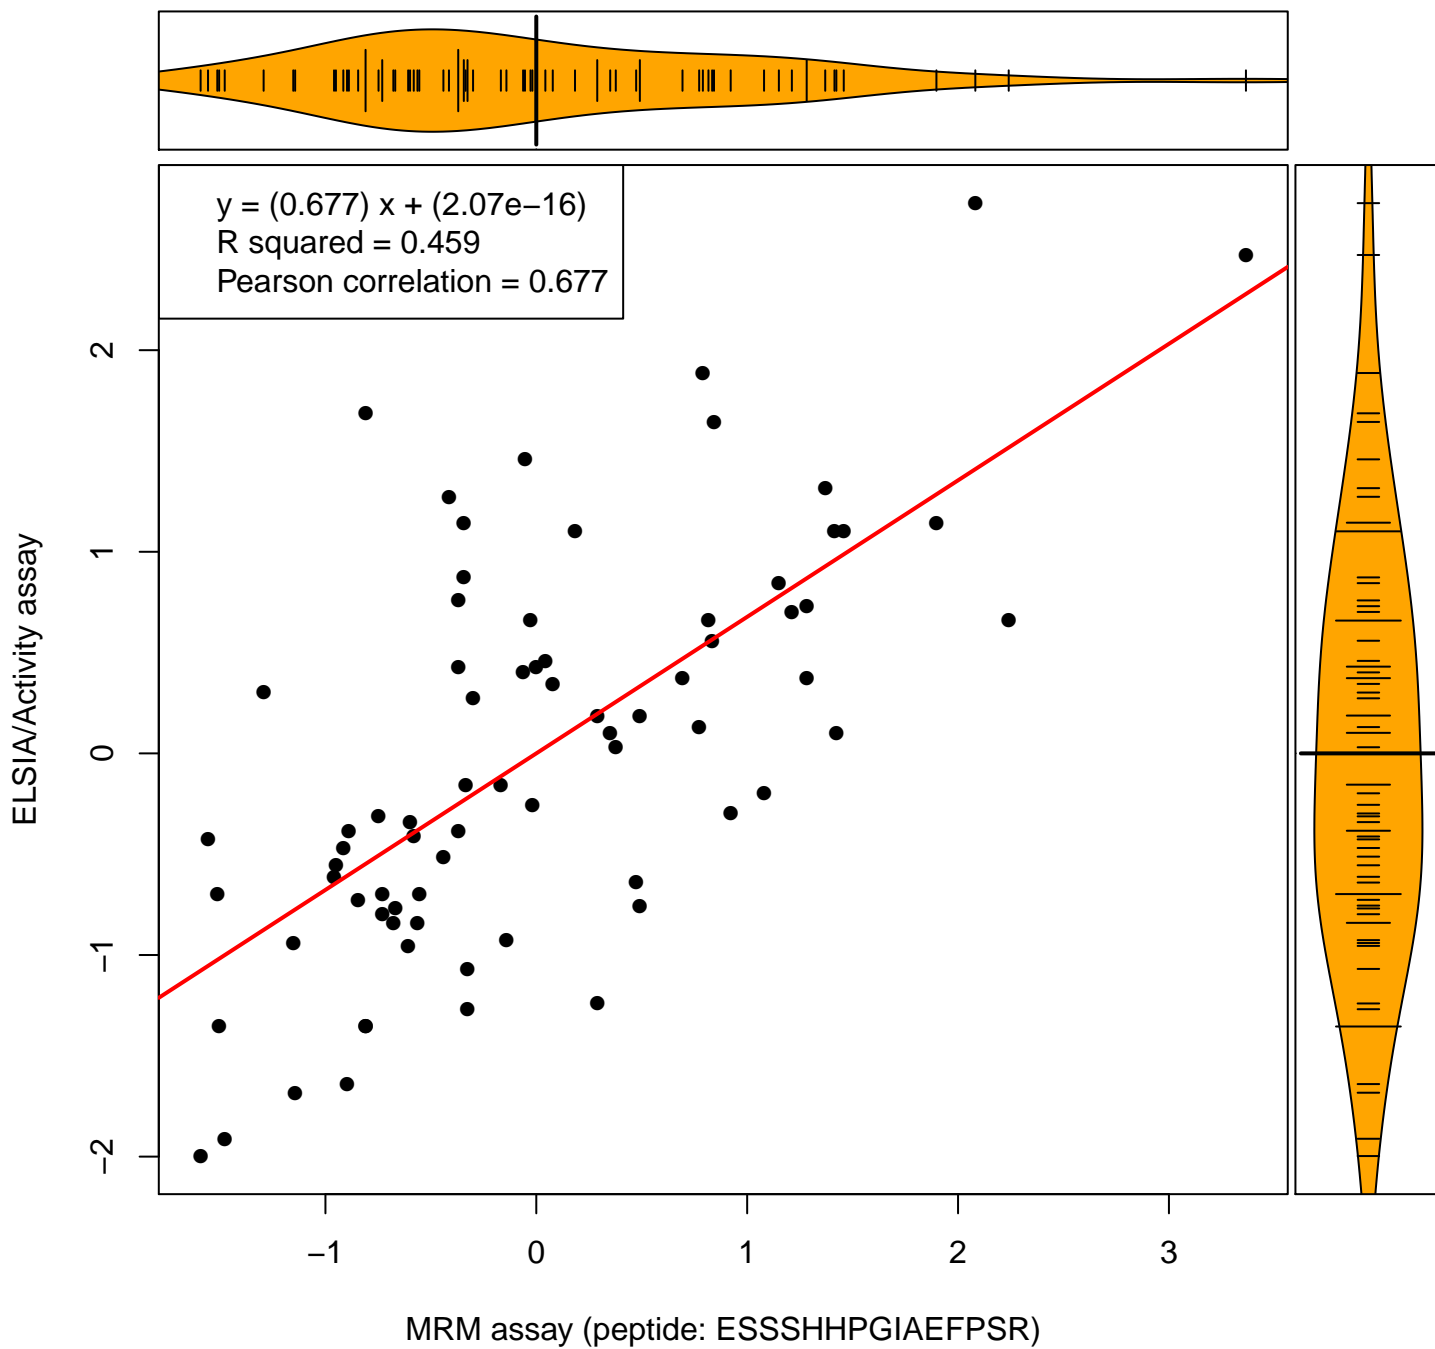

# Fibrinogen alpha chain, P02671

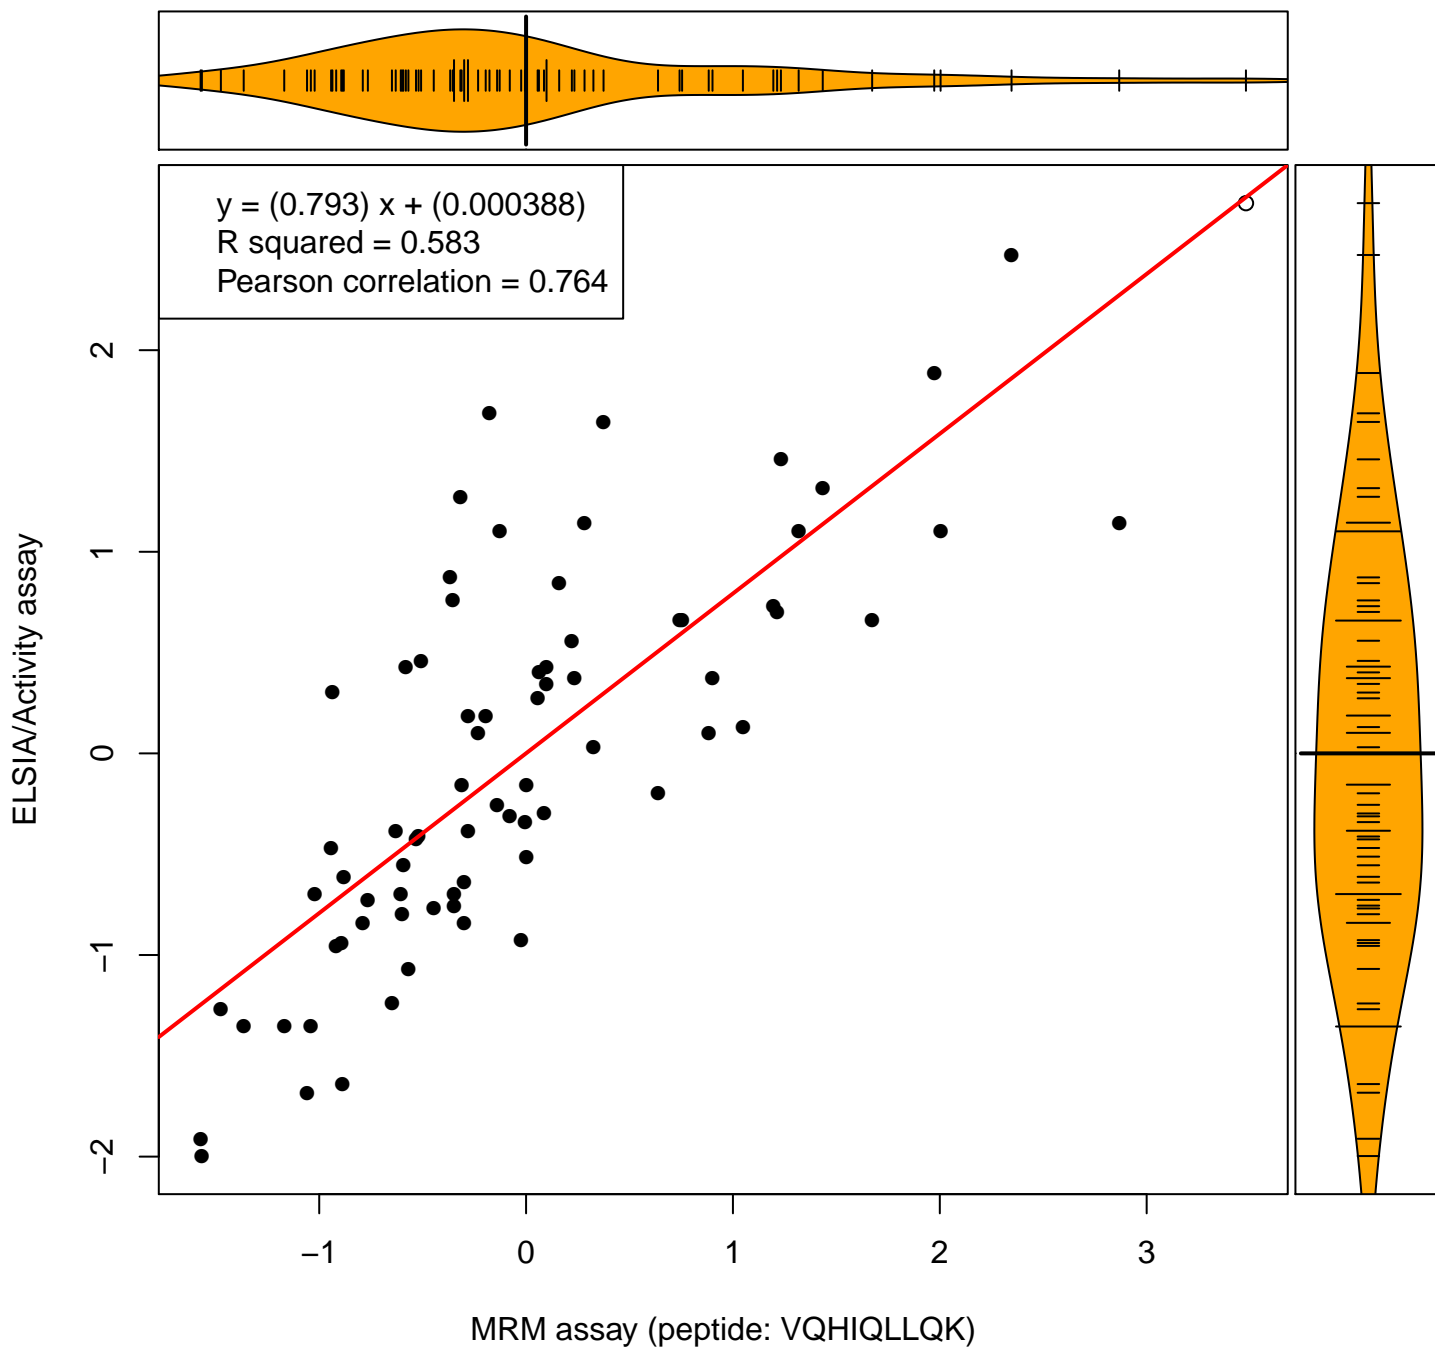

# Fibrinogen alpha chain, P02671

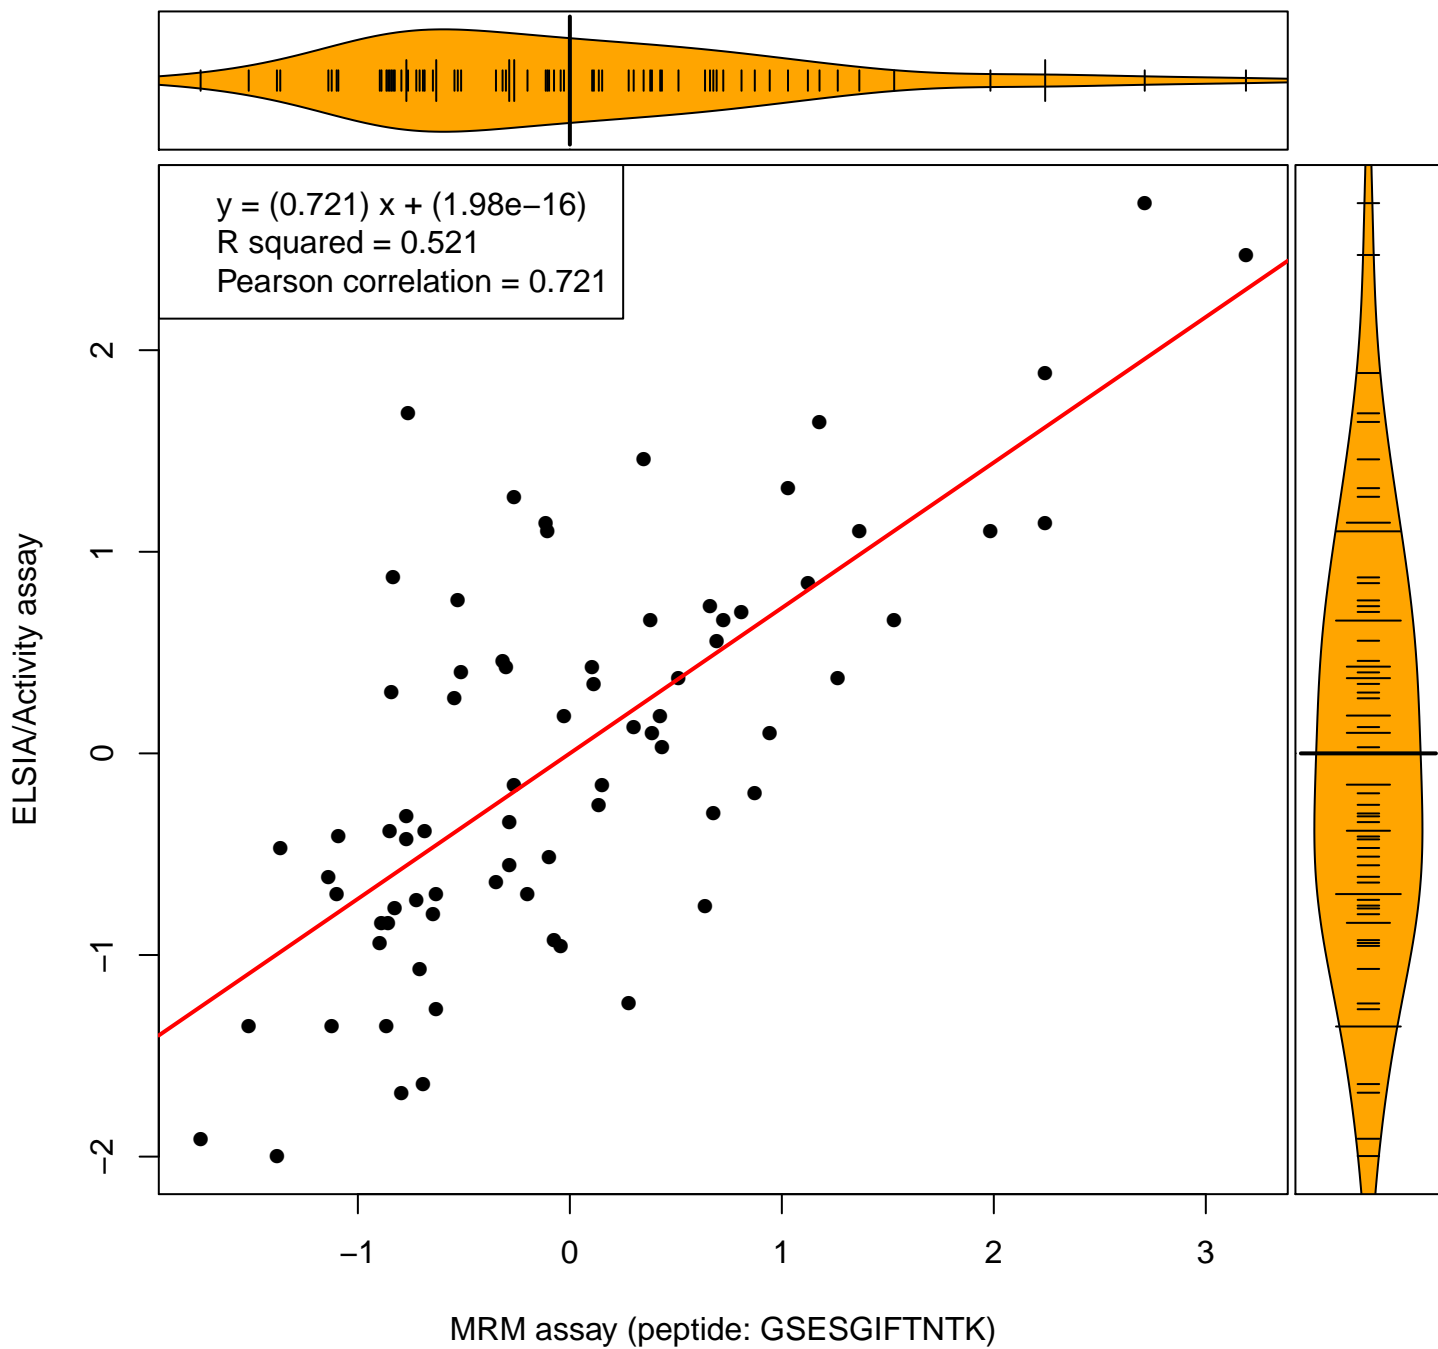

# Fibrinogen beta chain, P02675

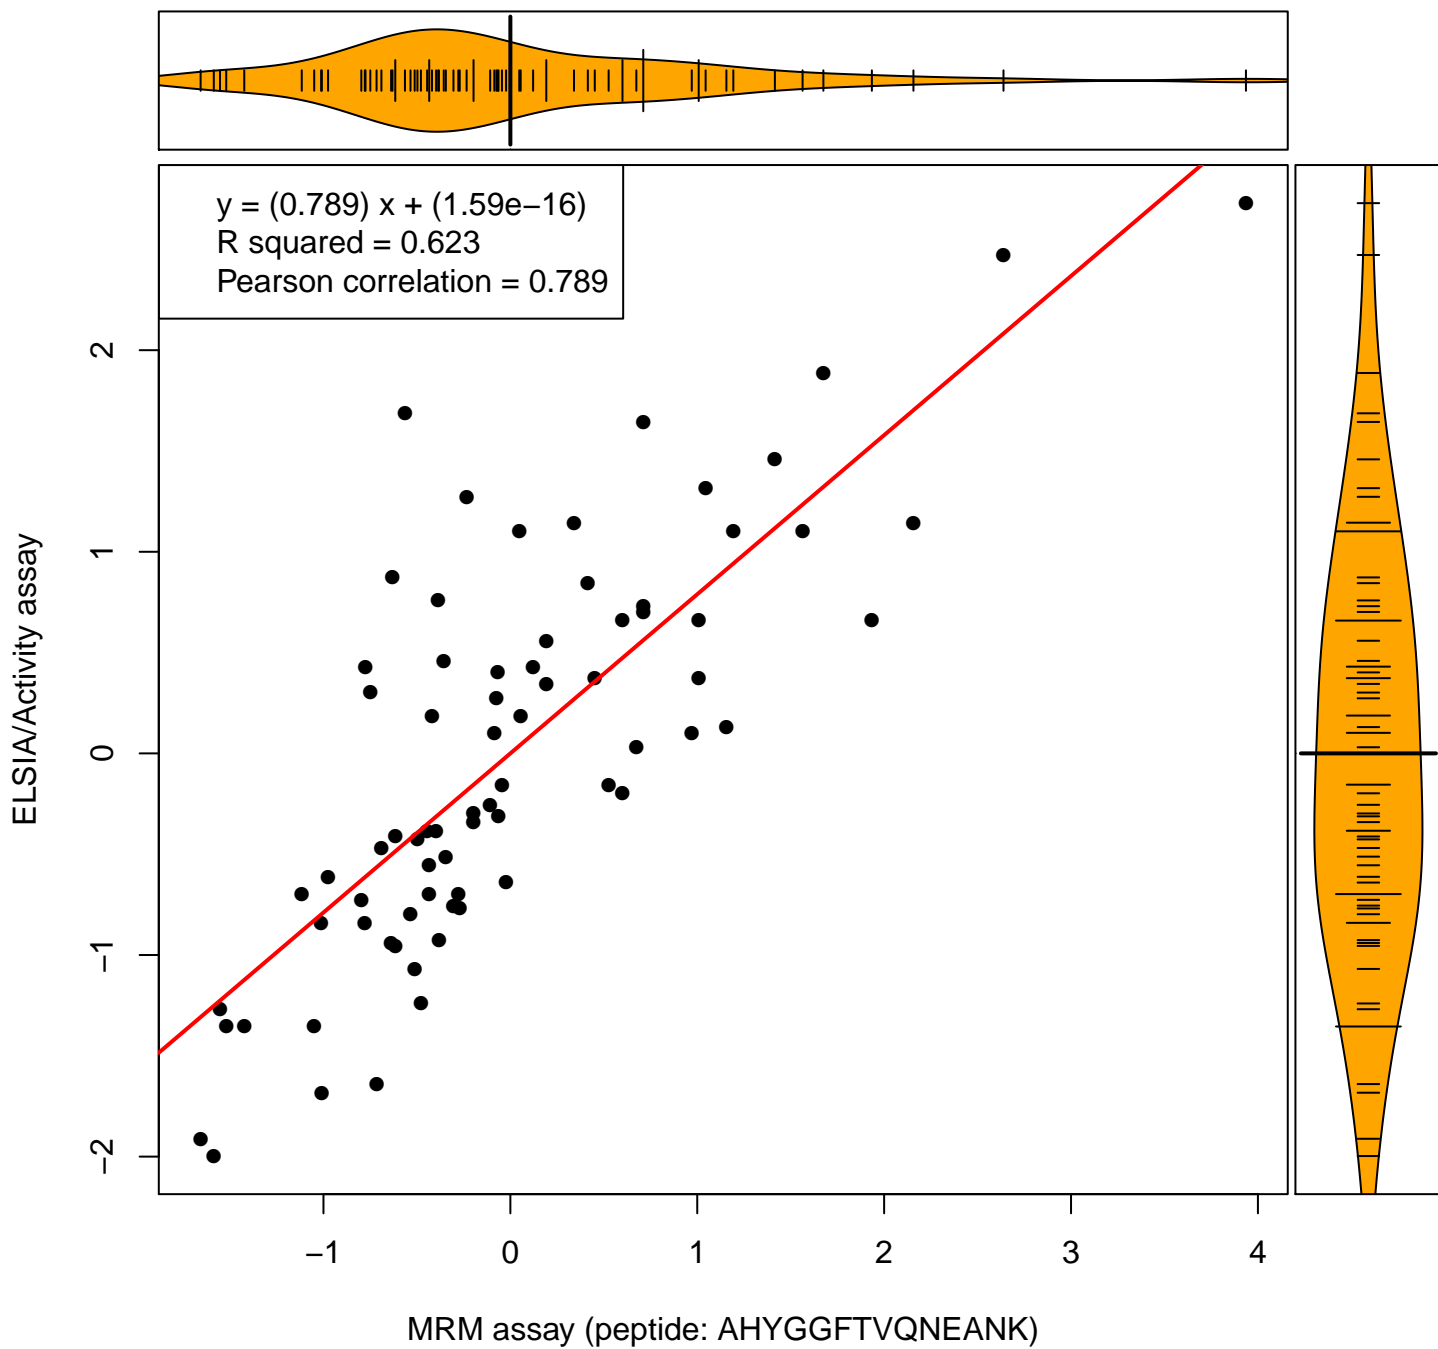

# Fibrinogen beta chain, P02675

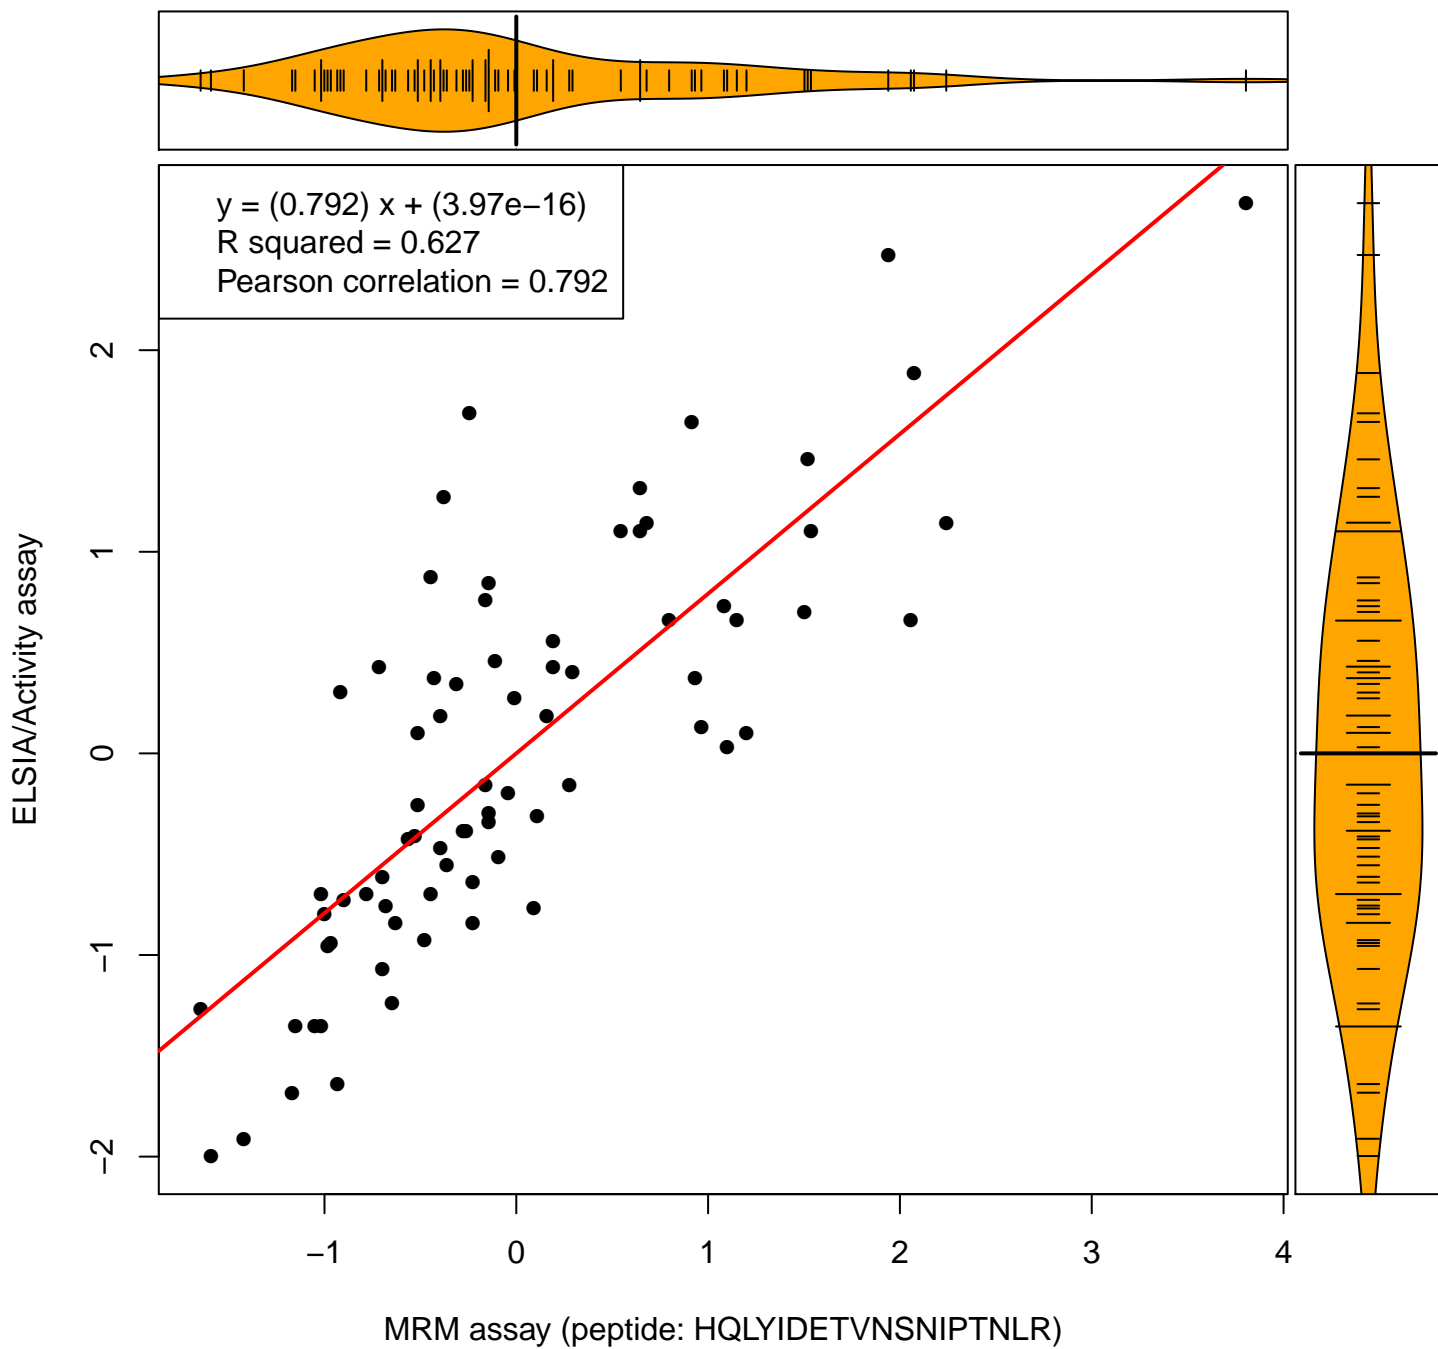

# Fibrinogen beta chain, P02675

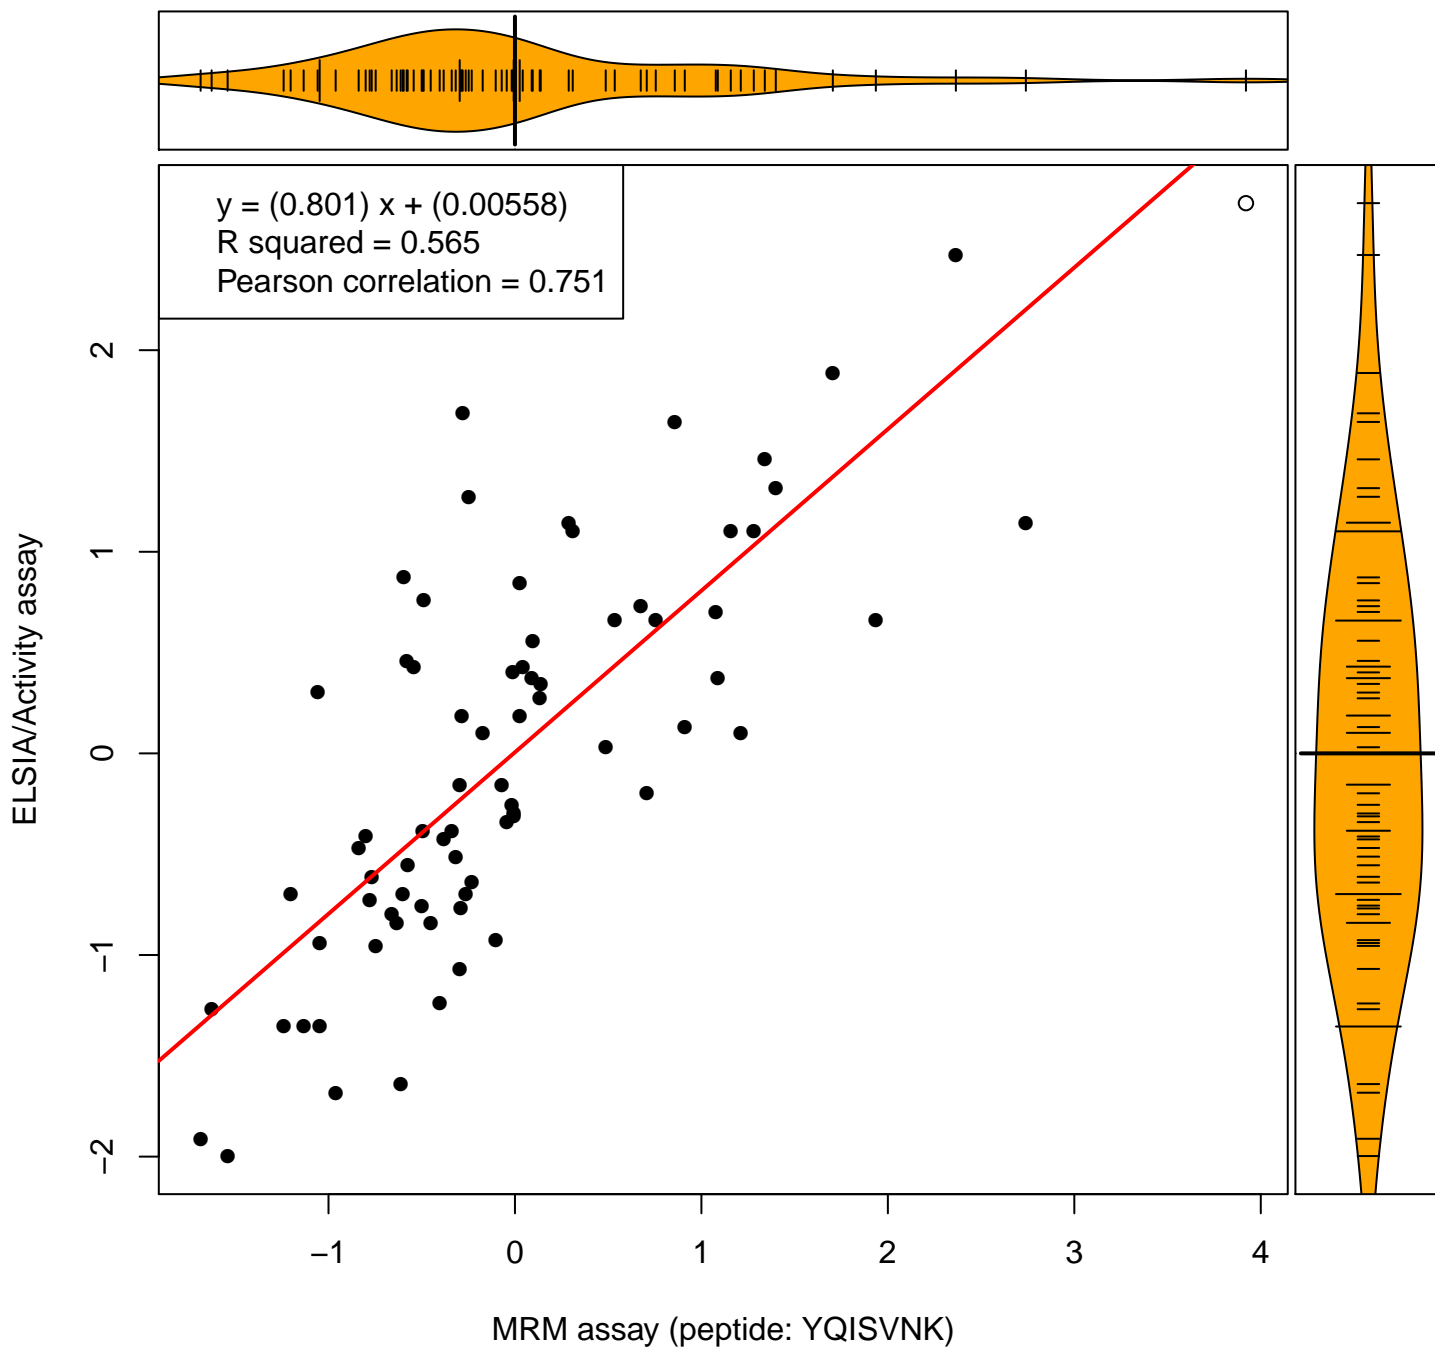

# Fibrinogen gamma chain, P02679

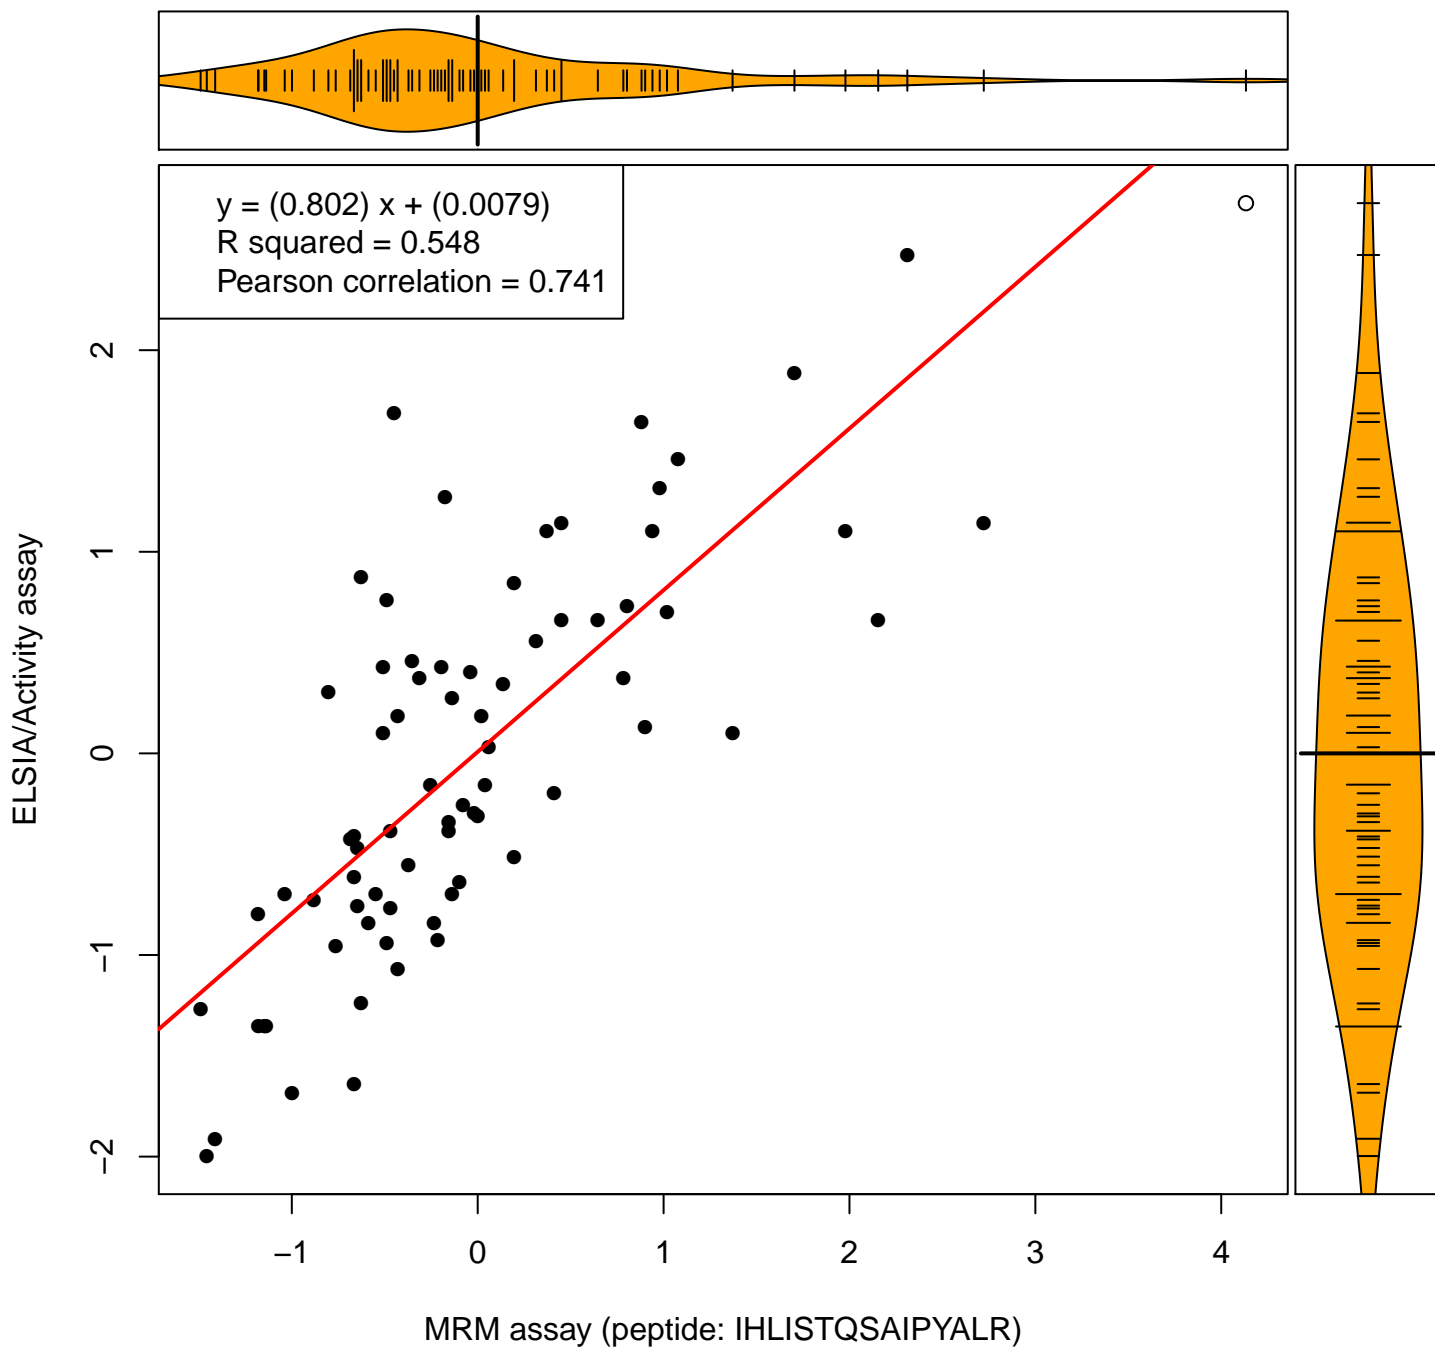



# Fibrinogen gamma chain, P02679

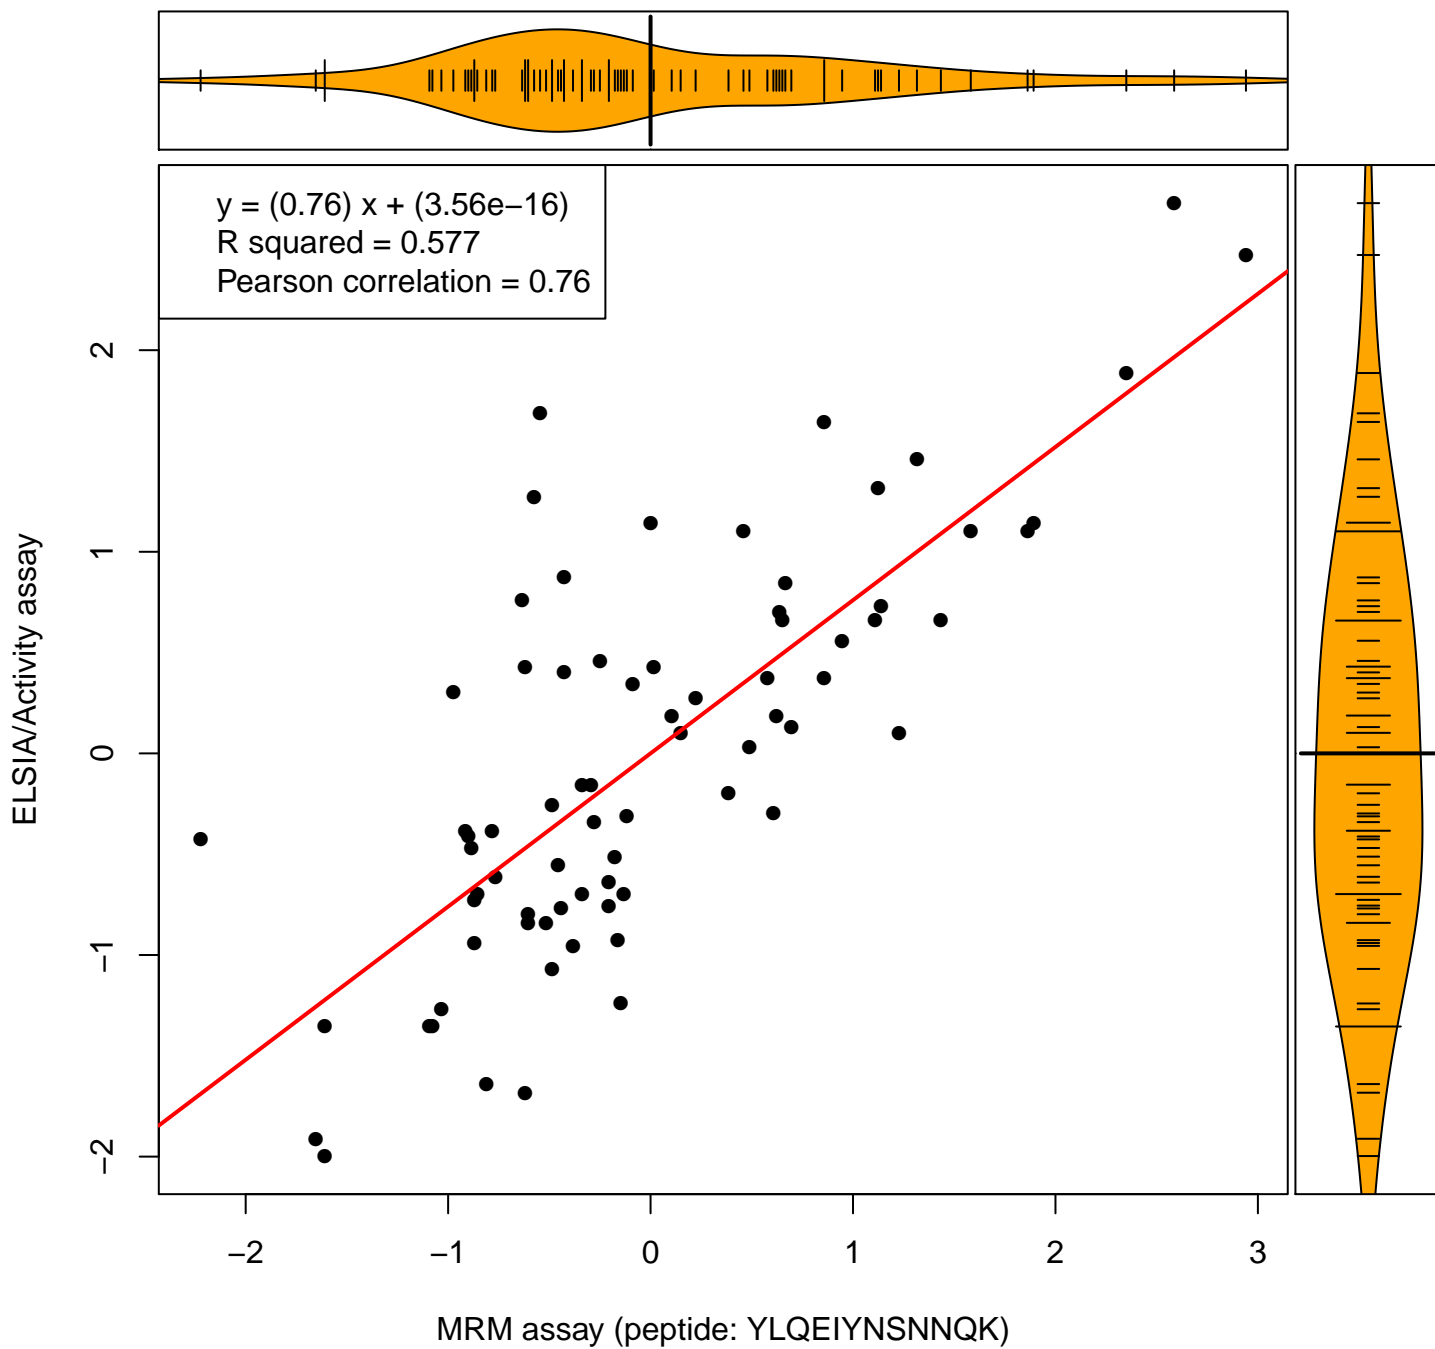

# Fibrinogen gamma chain, P02679

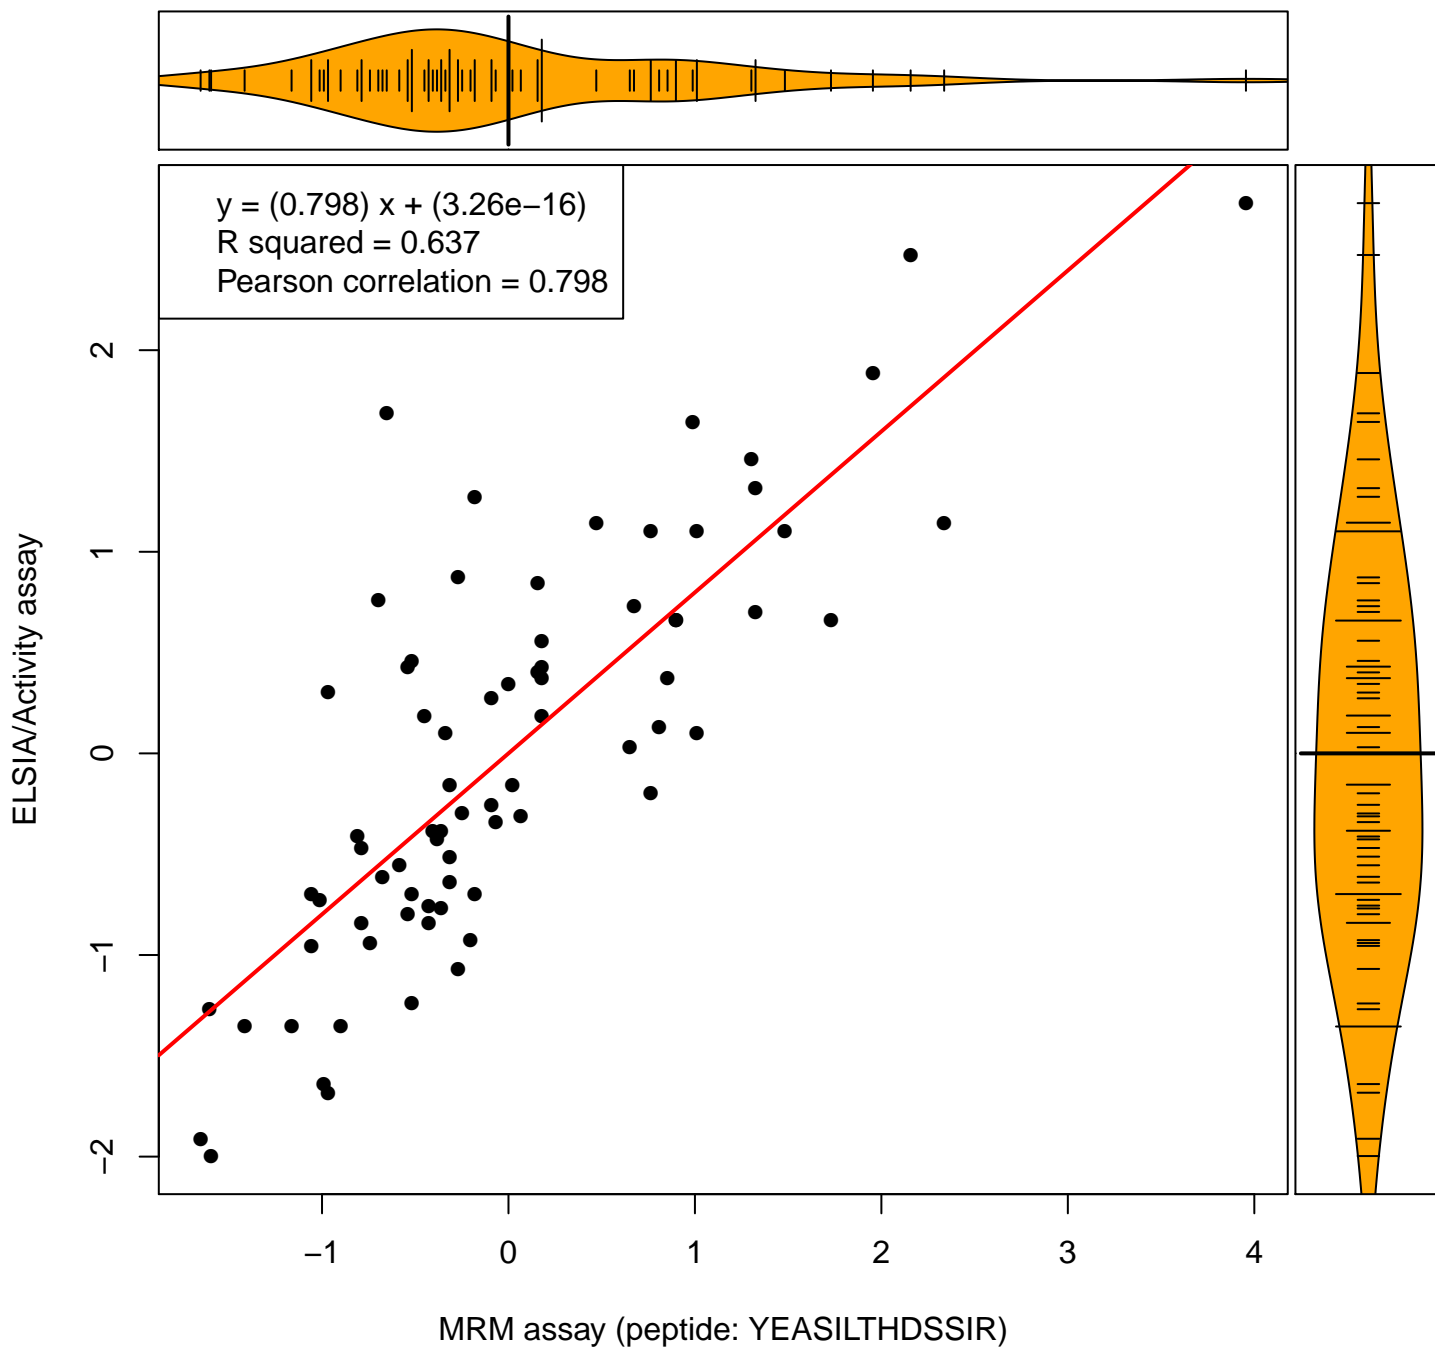

# Coagulation factor V, P12259

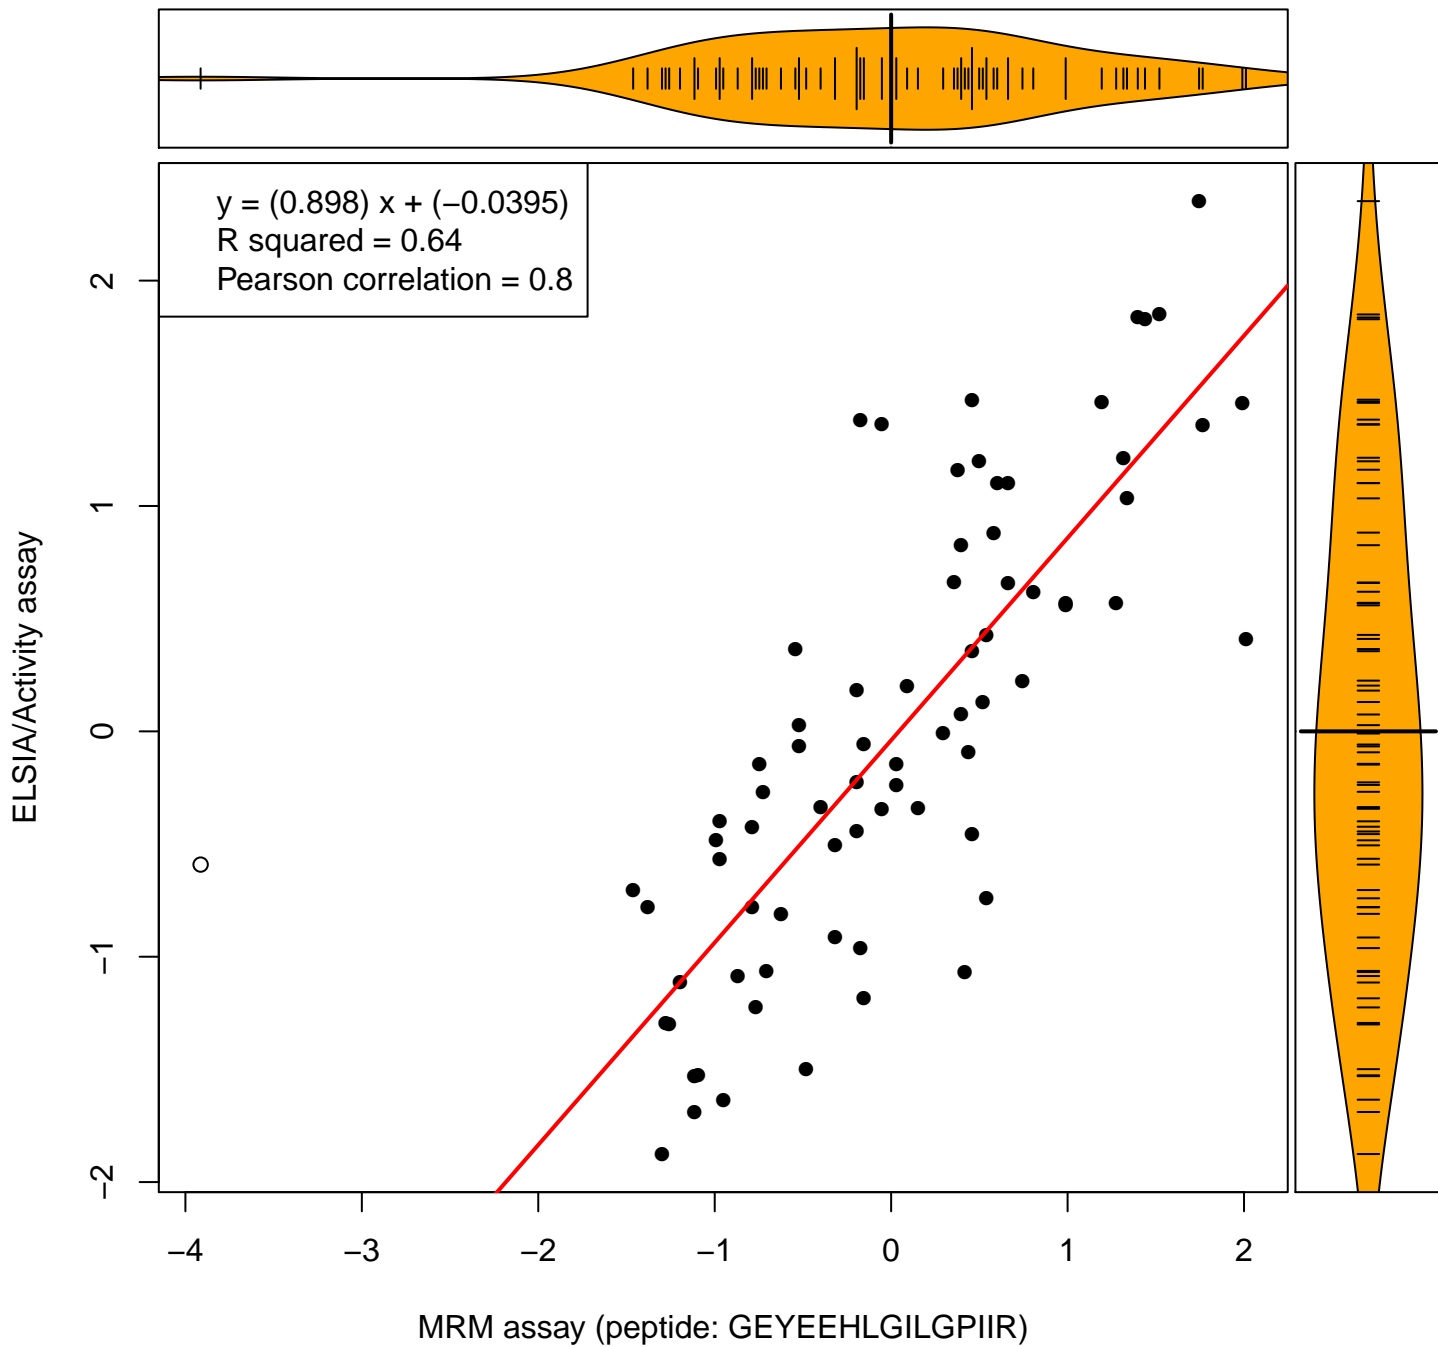

# Coagulation factor V, P12259

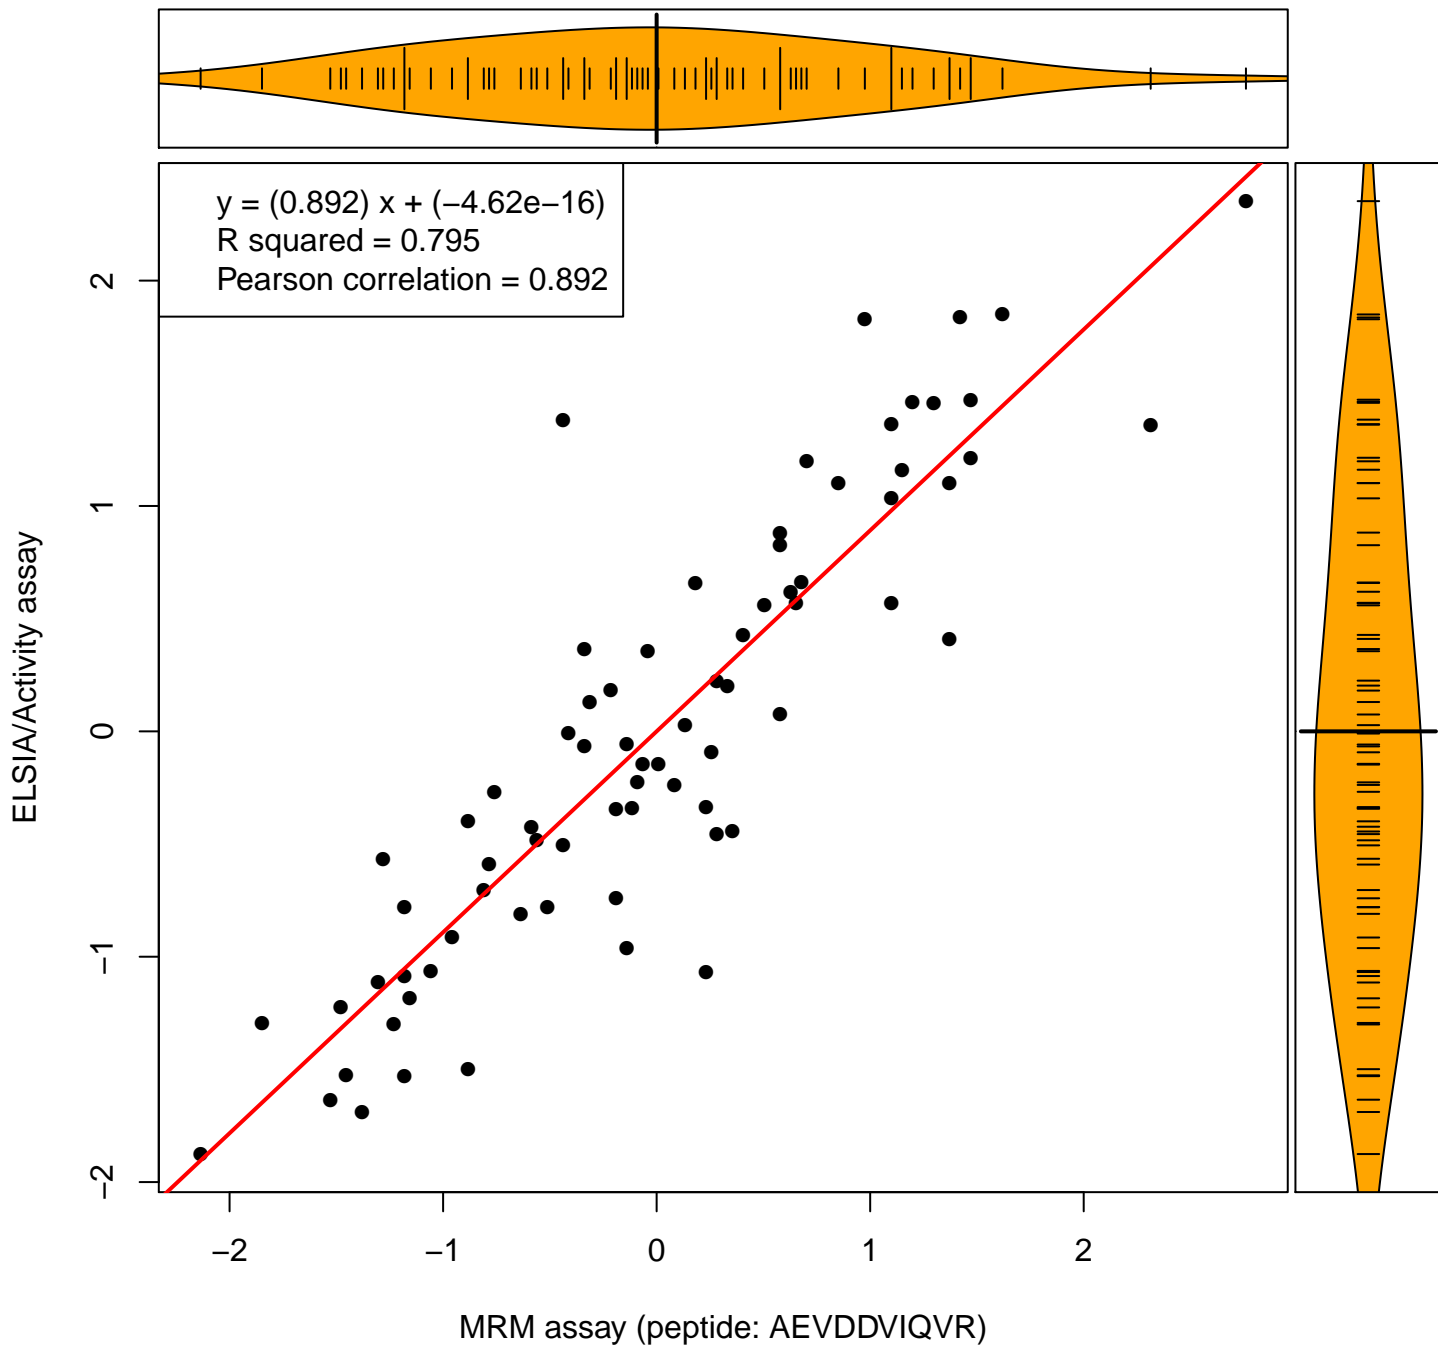

# Coagulation factor V, P12259

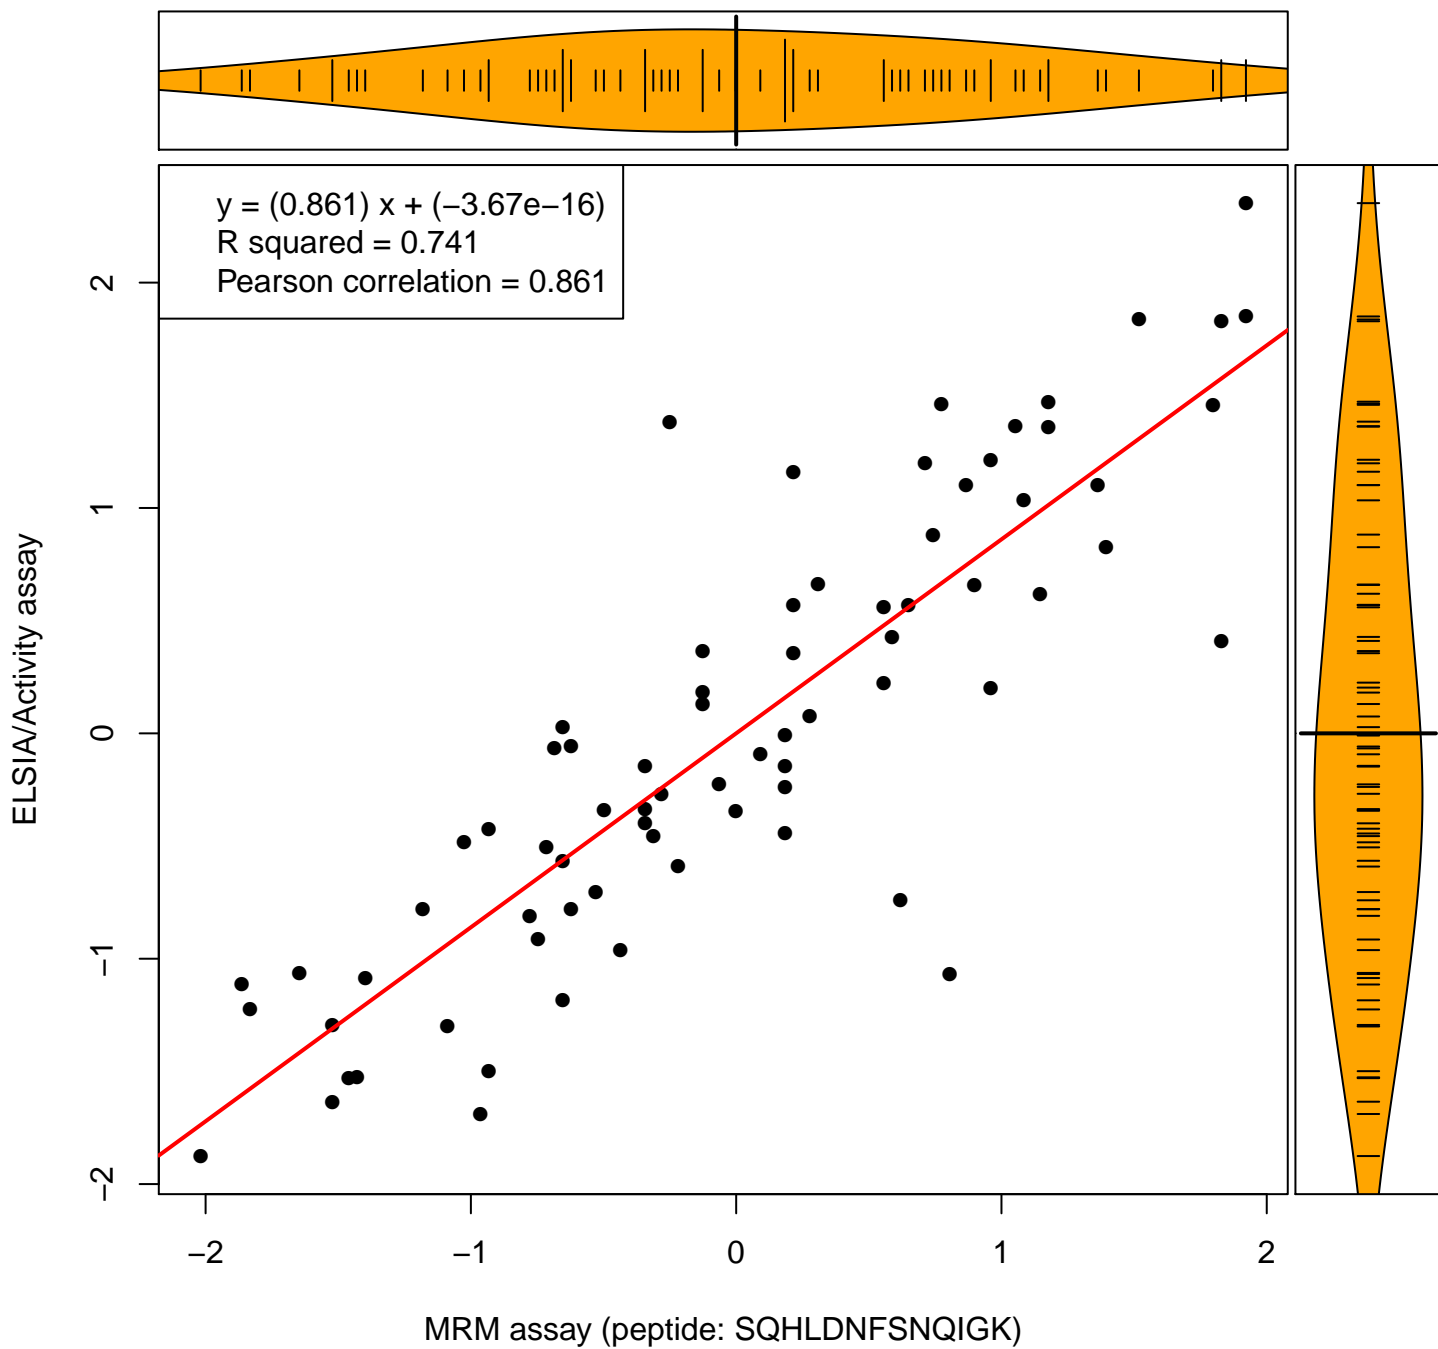

# Coagulation factor XI, P03951

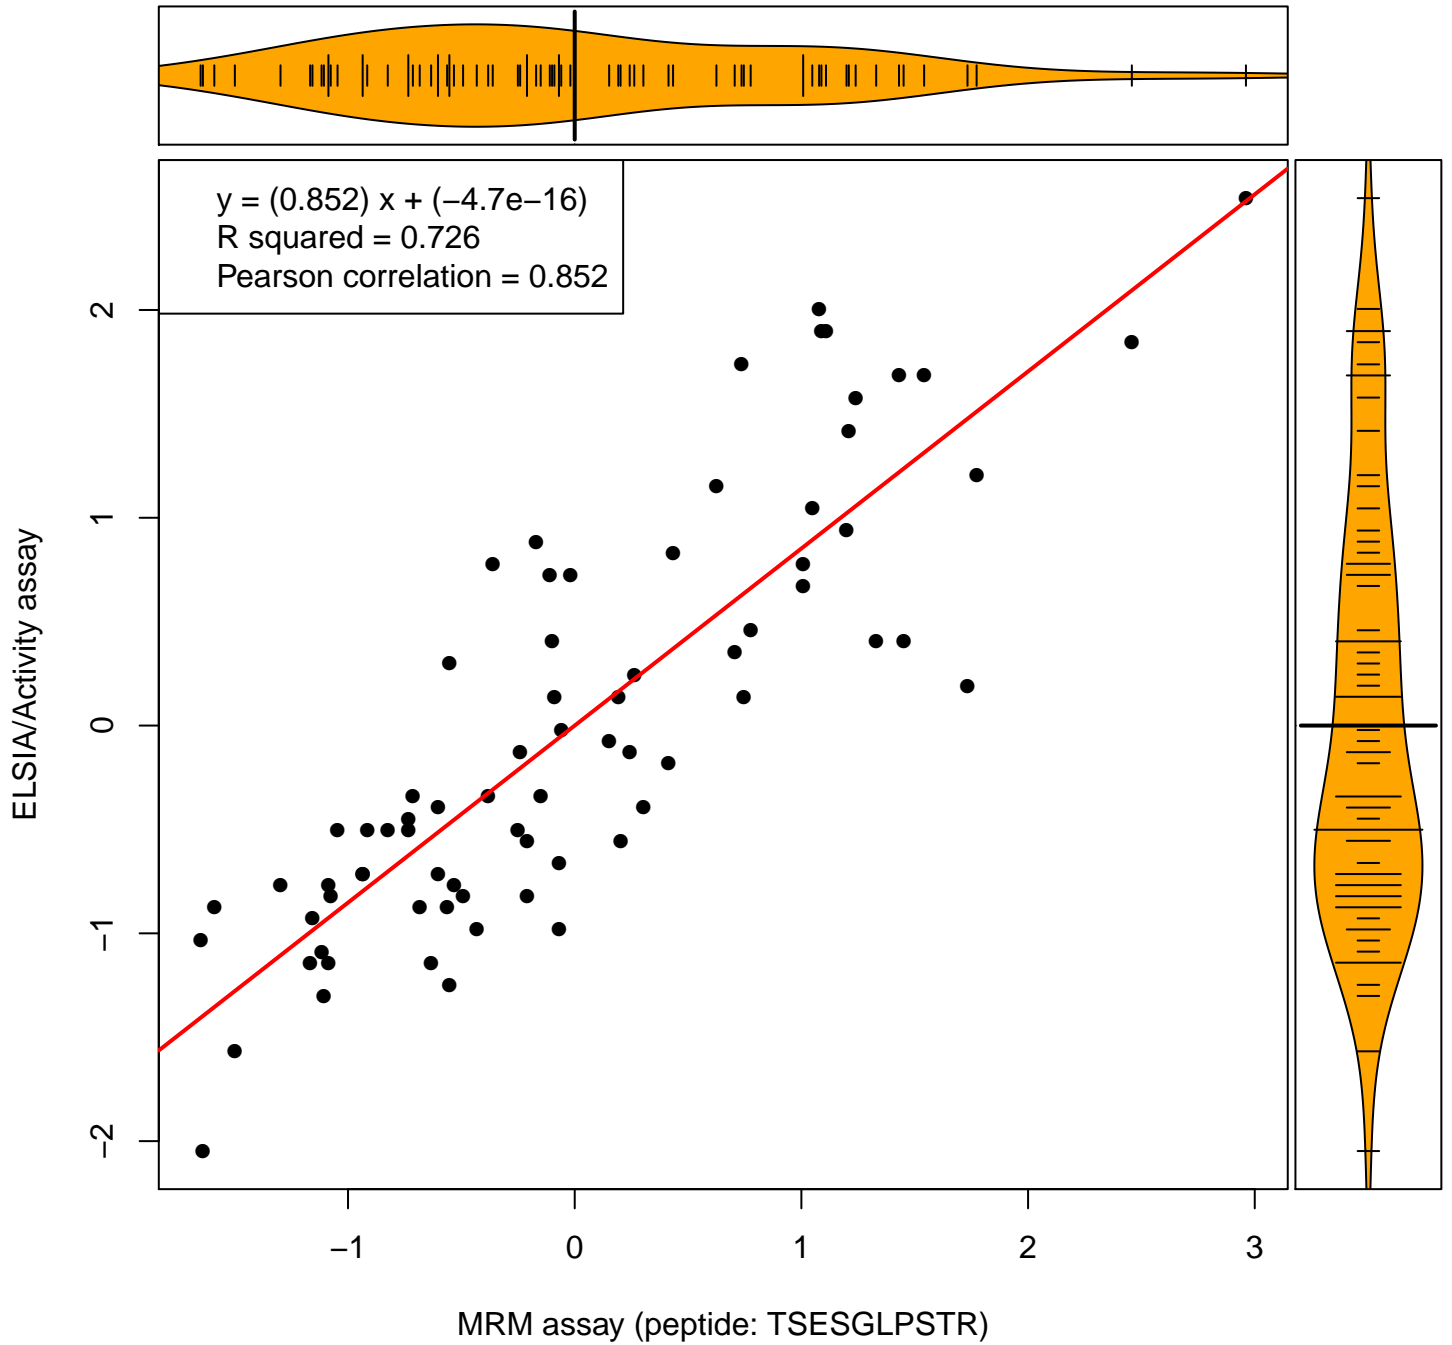

von Willebrand Factor, P04275

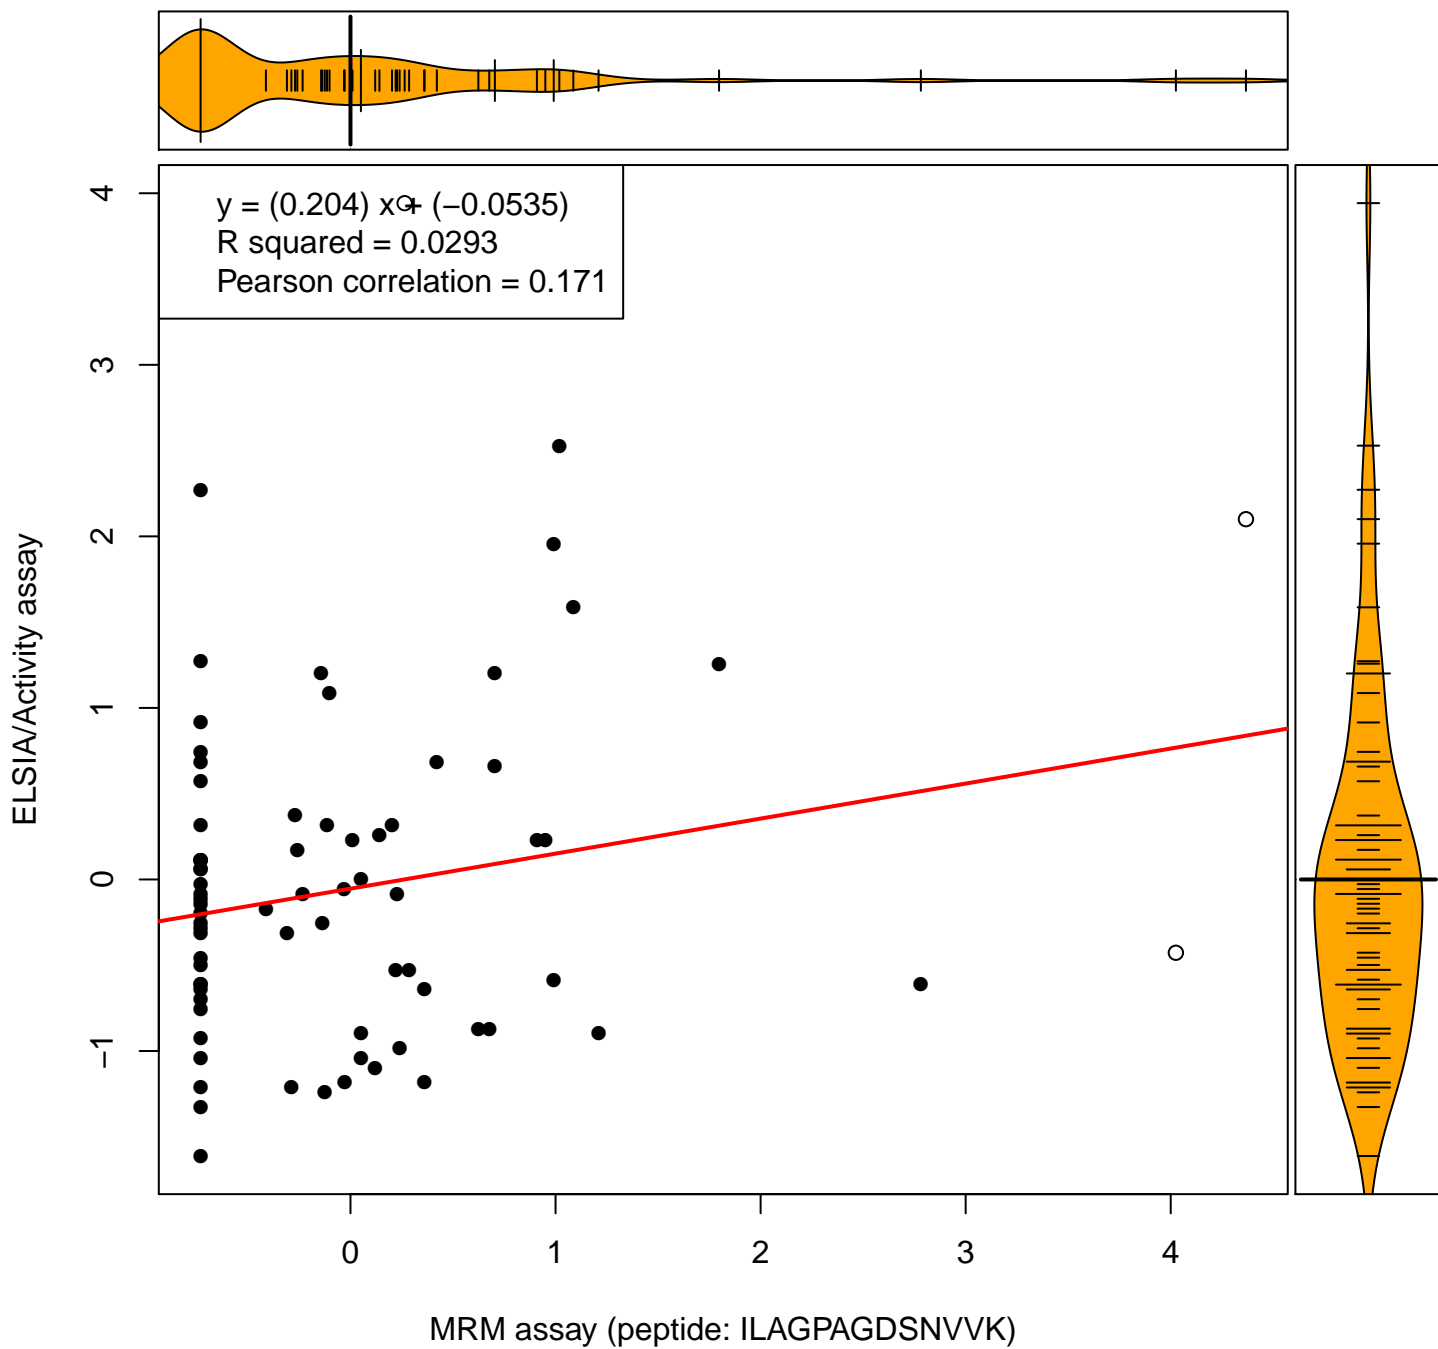

# Antithrombin-III, P01008

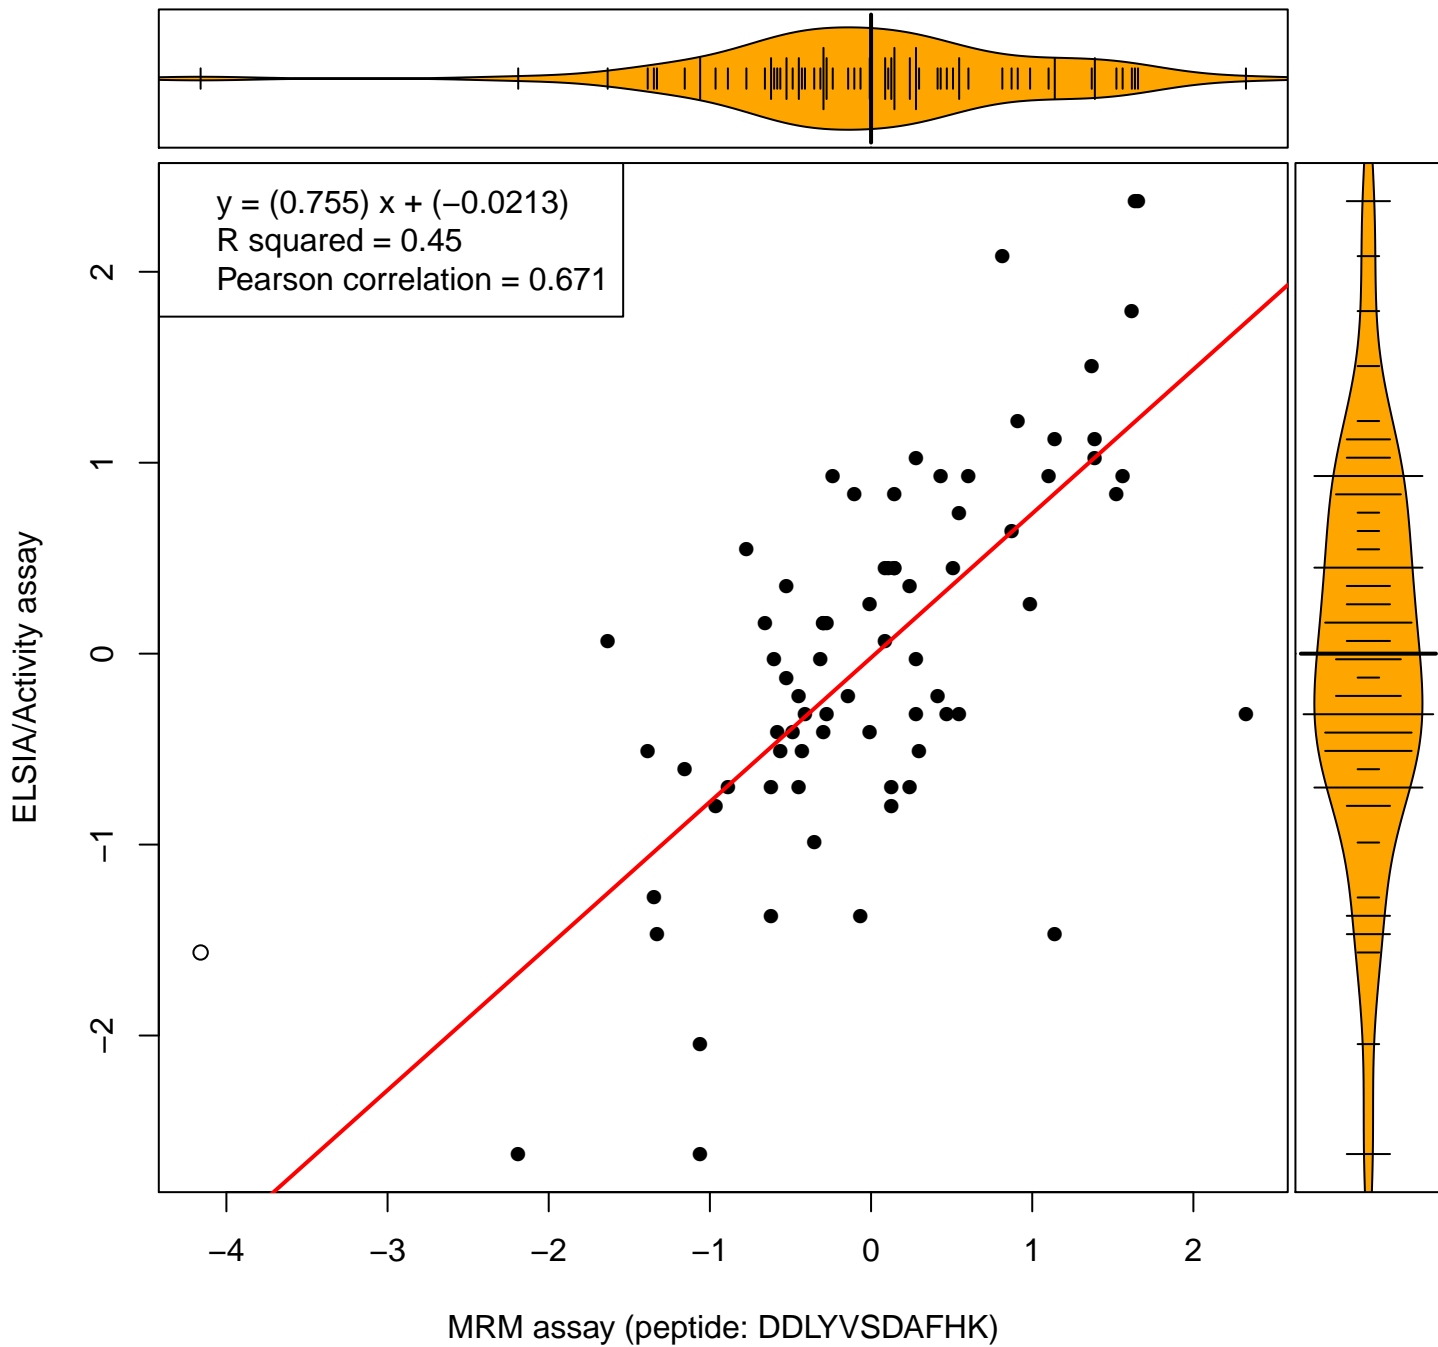



# Antithrombin-III, P01008

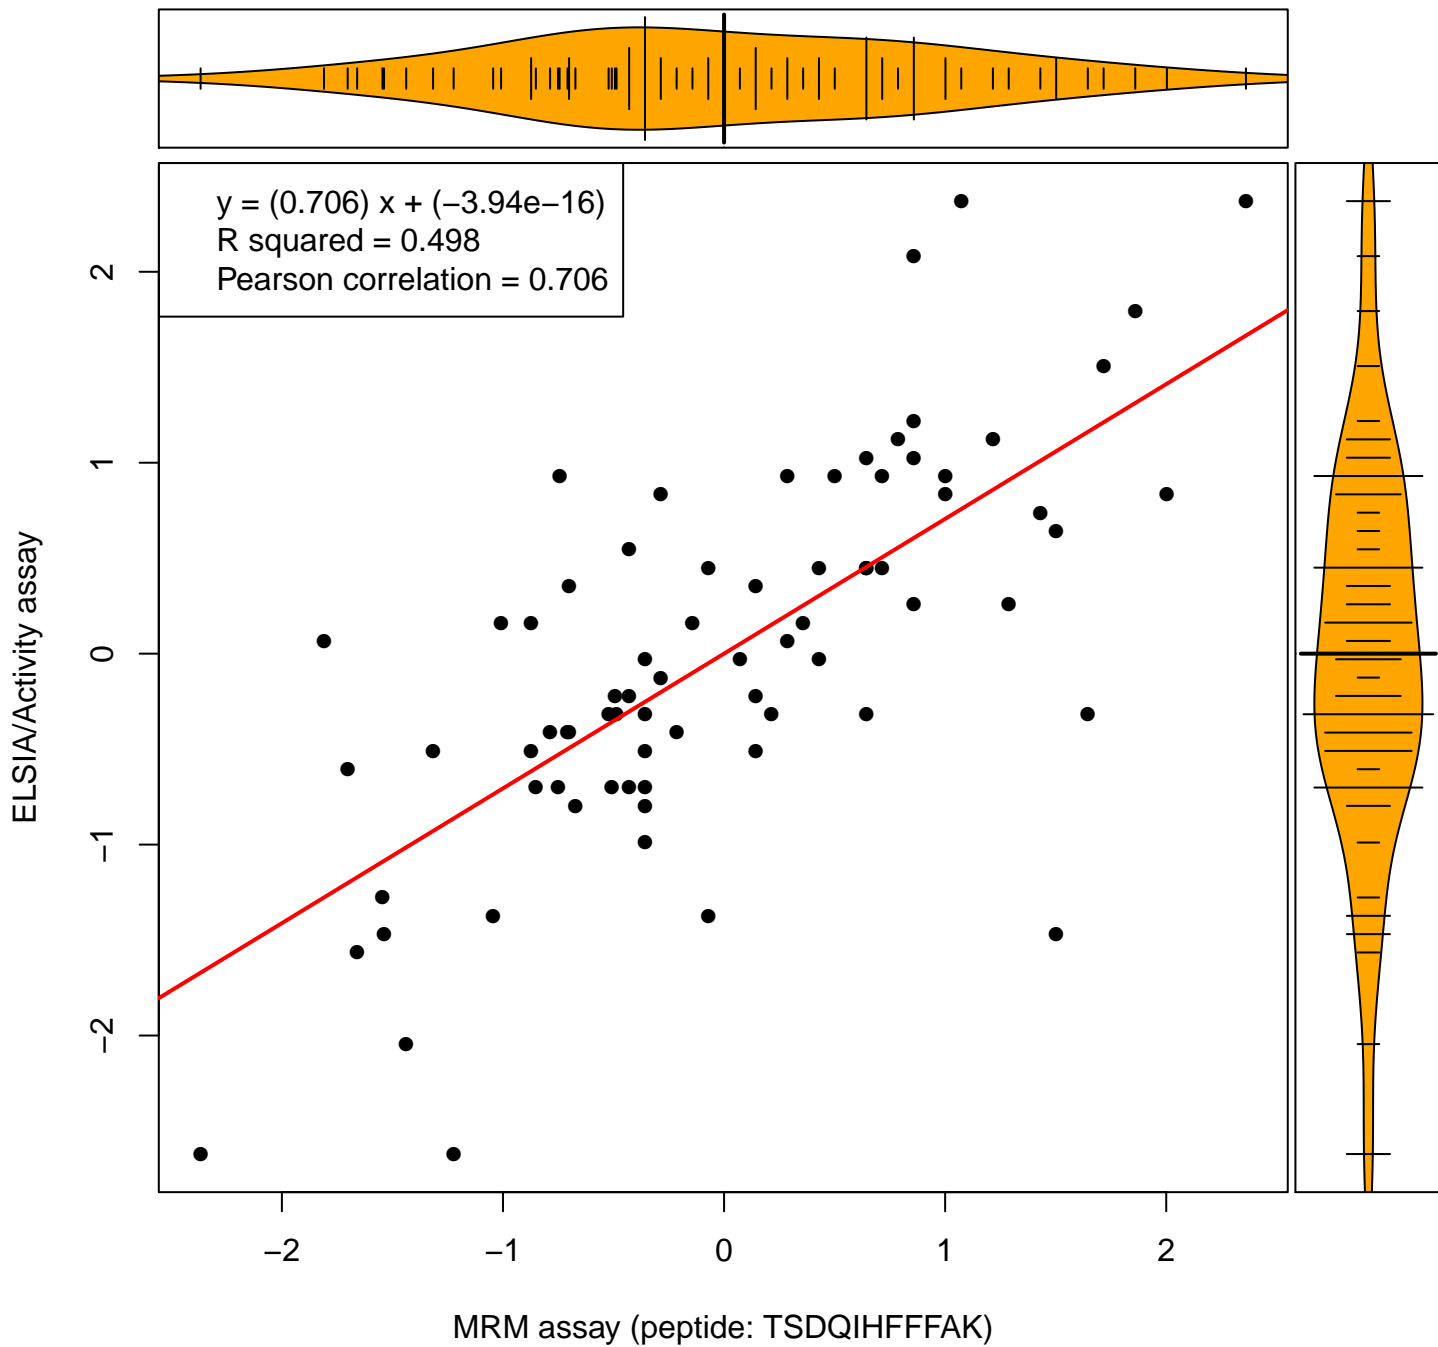

# Antithrombin-III, P01008

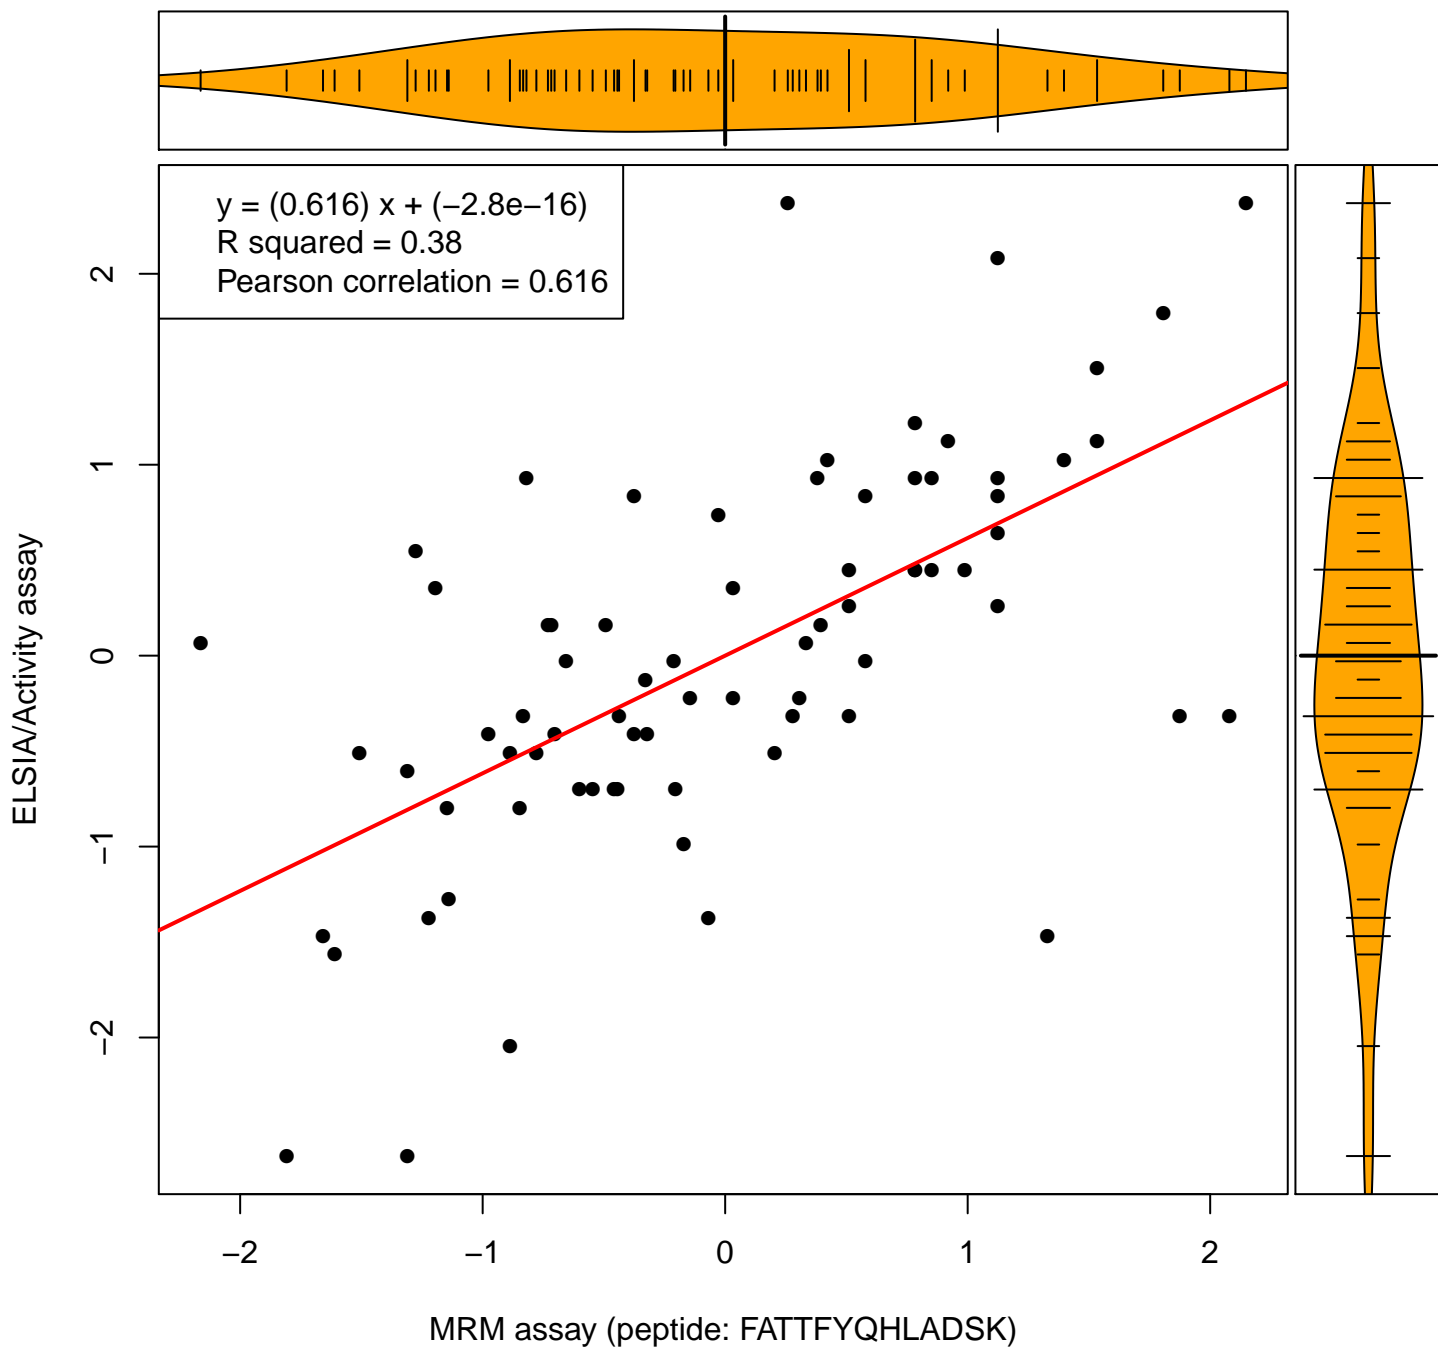

# Vitamin K-dependent protein C, P04070

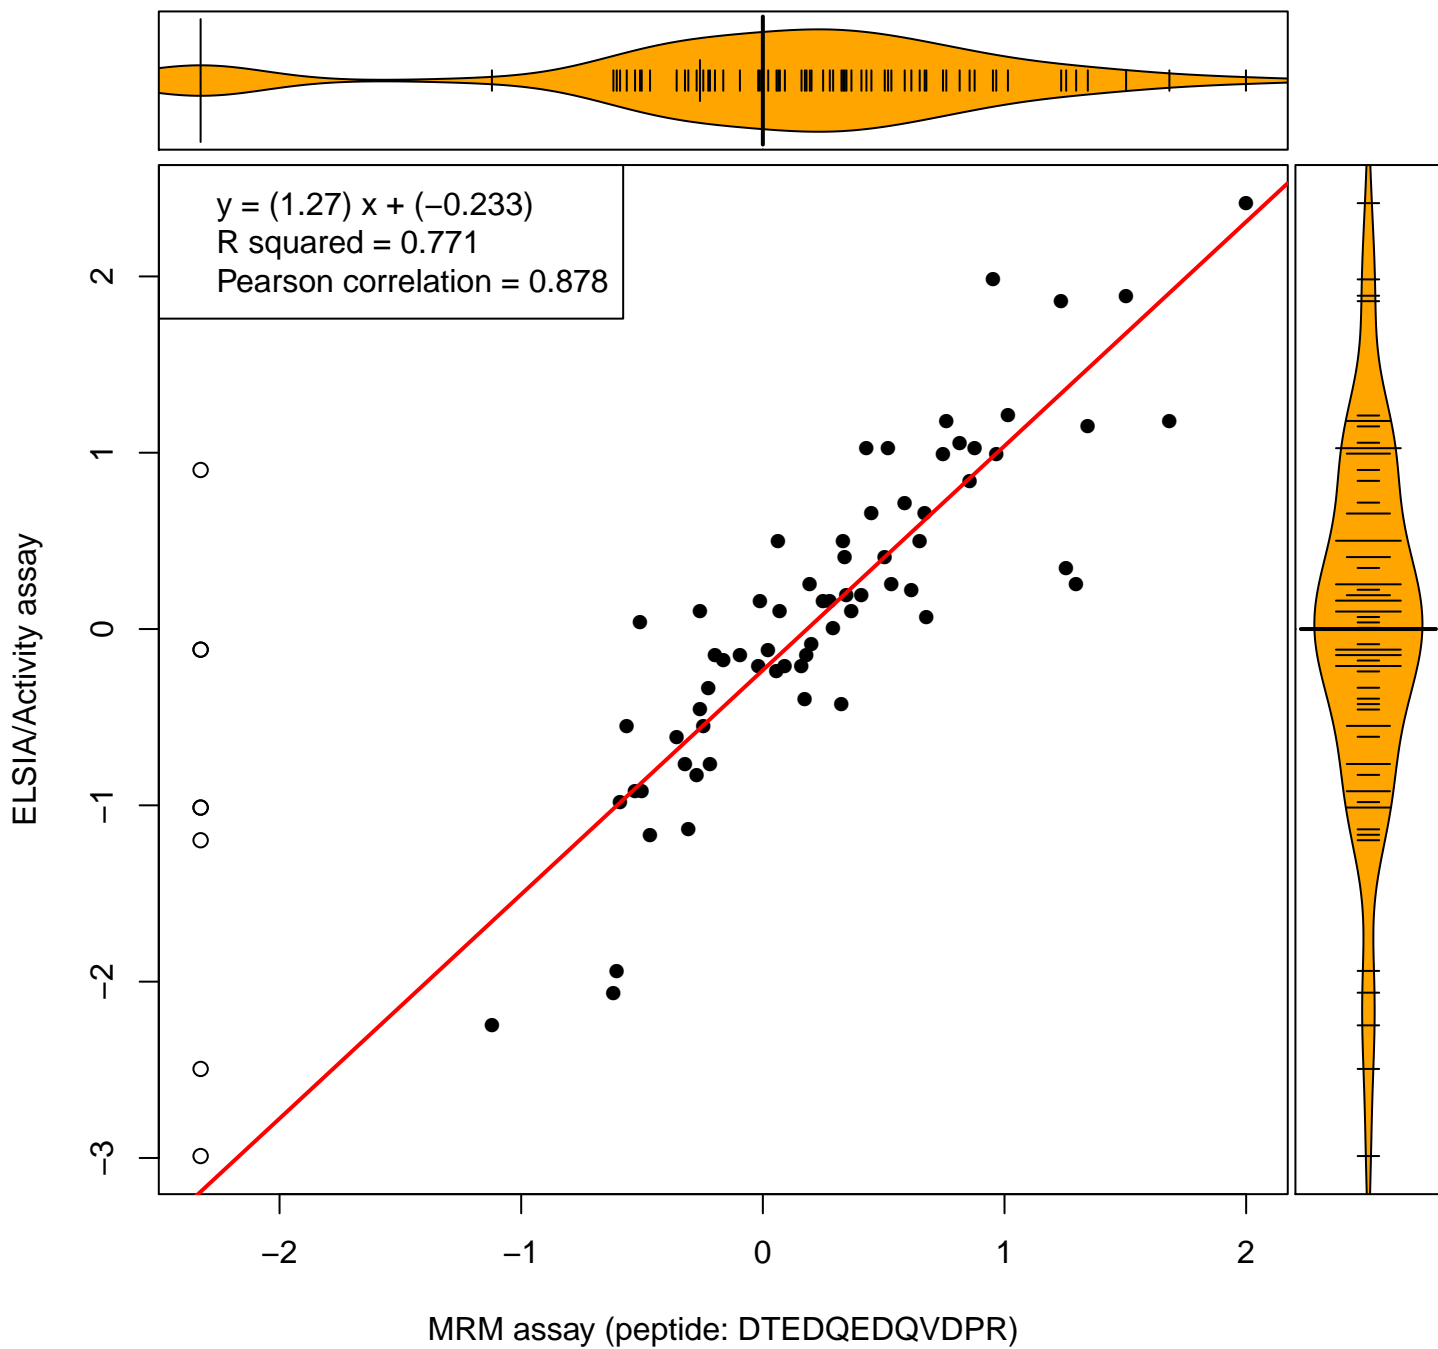

# Vitamin K-dependent protein C, P04070

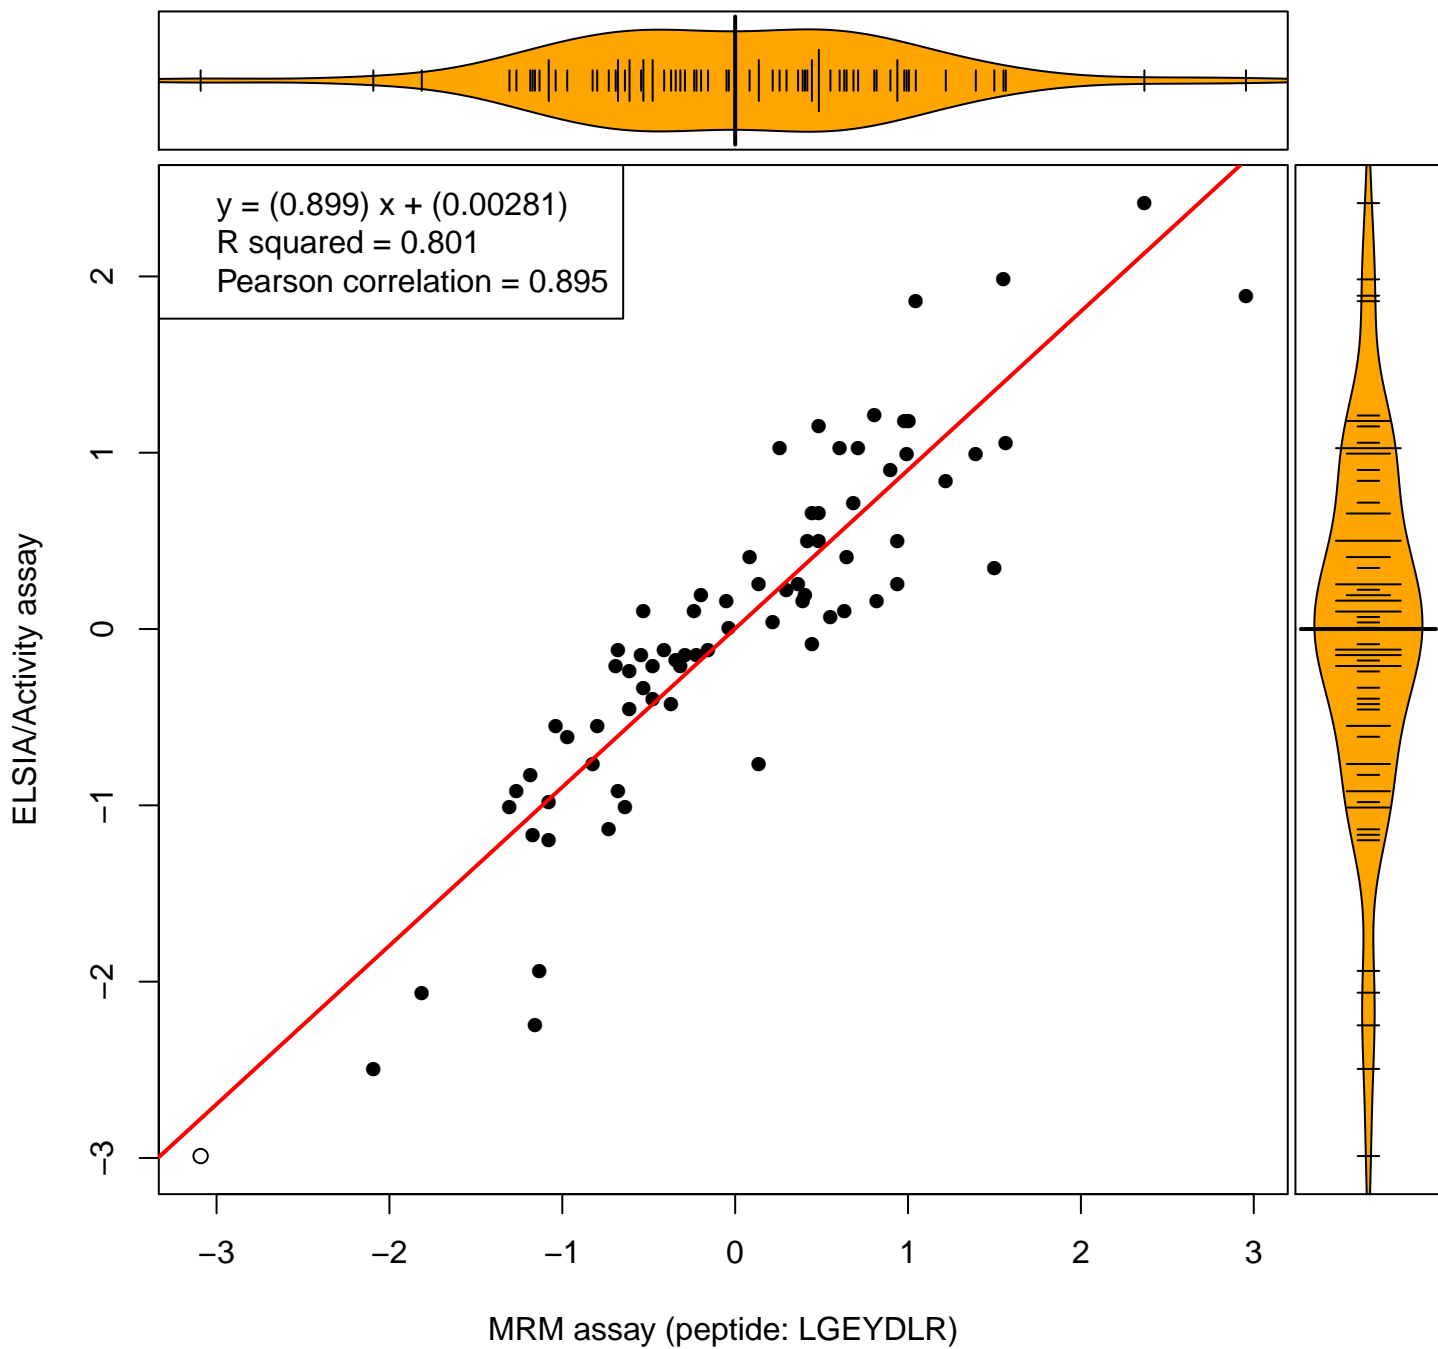

# Vitamin K-dependent protein C, P04070

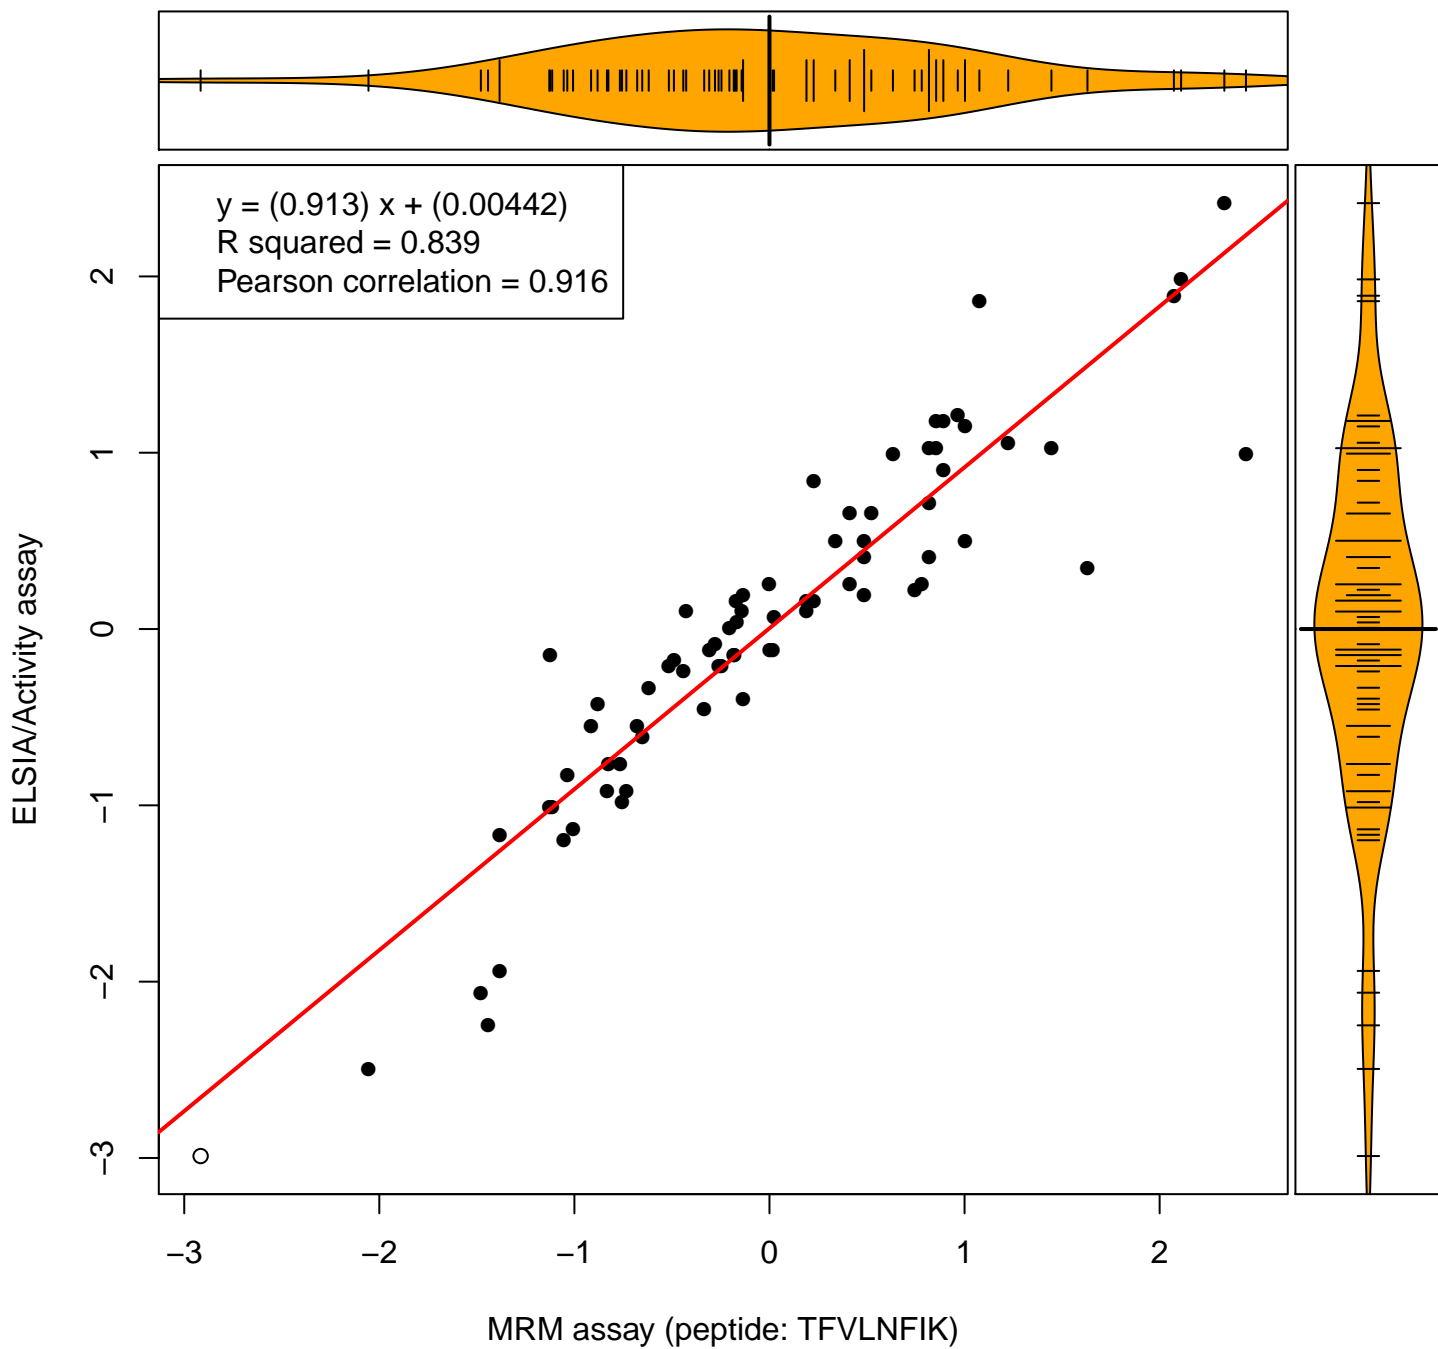

# Vitamin K-dependent protein S, P07225

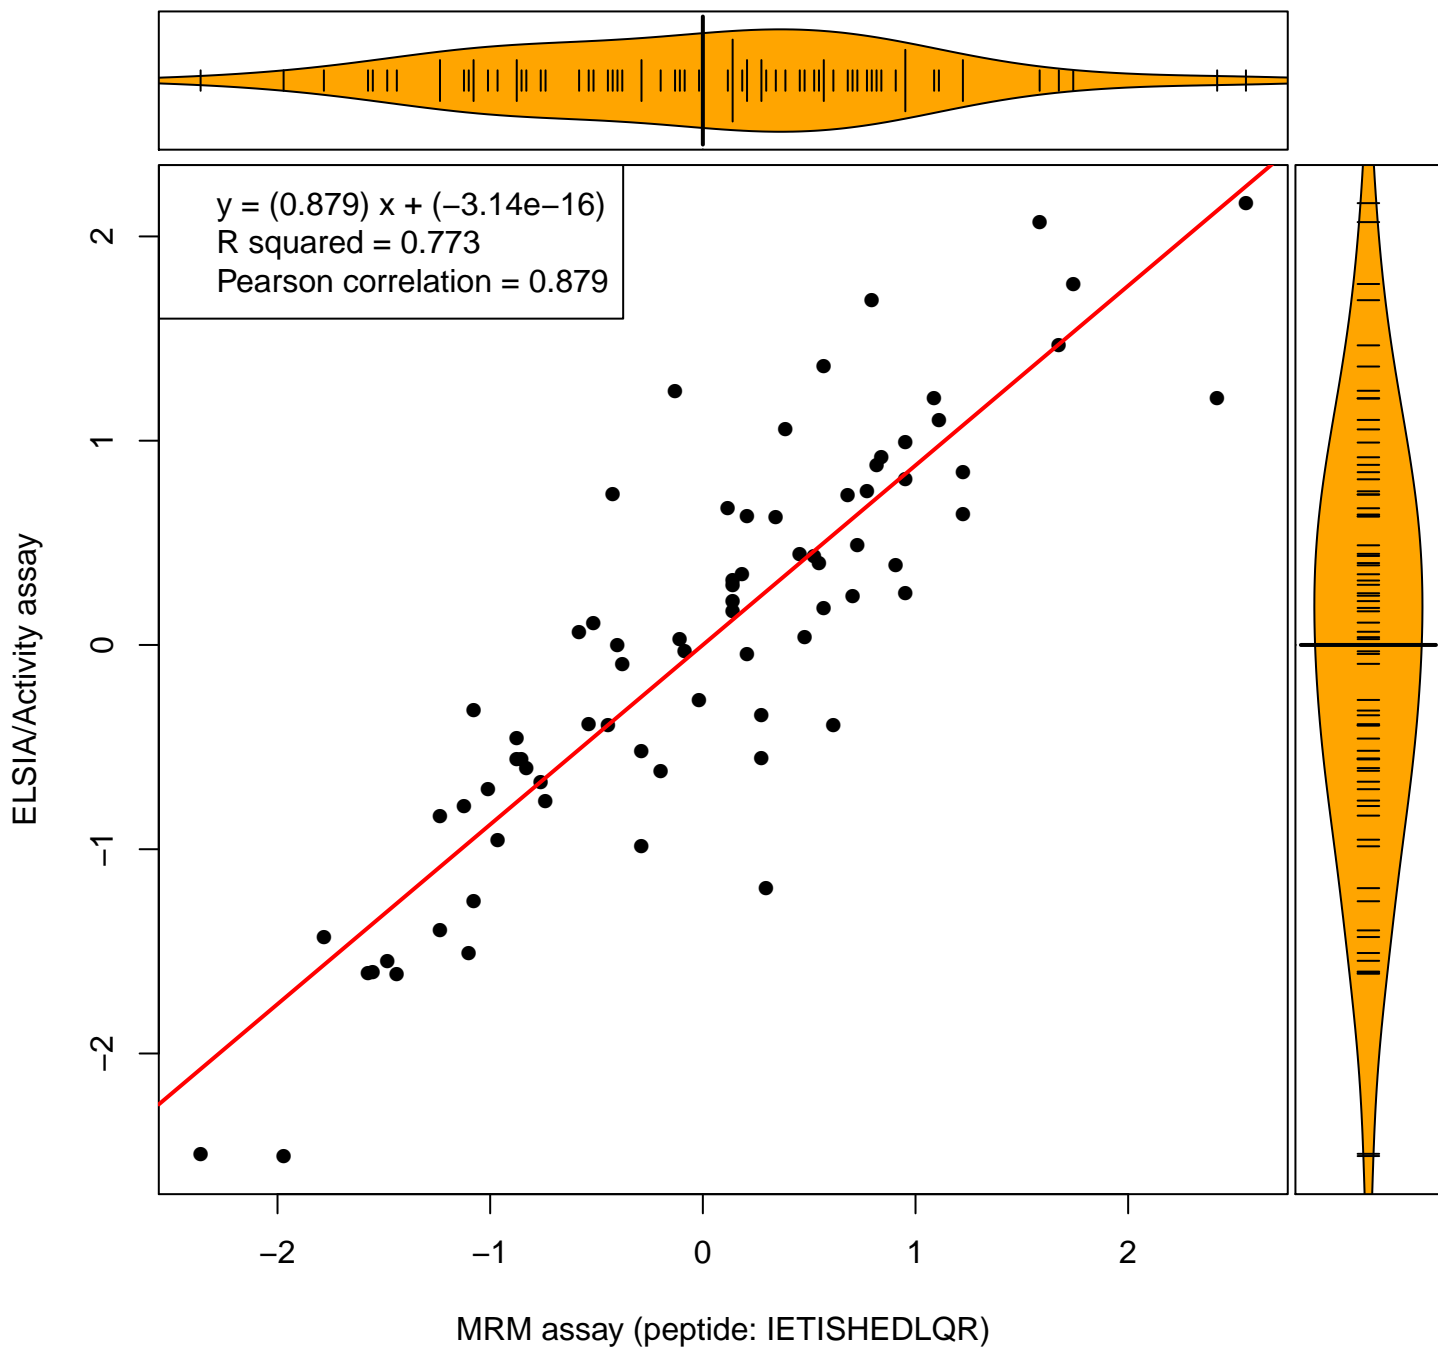

# Vitamin K-dependent protein S, P07225

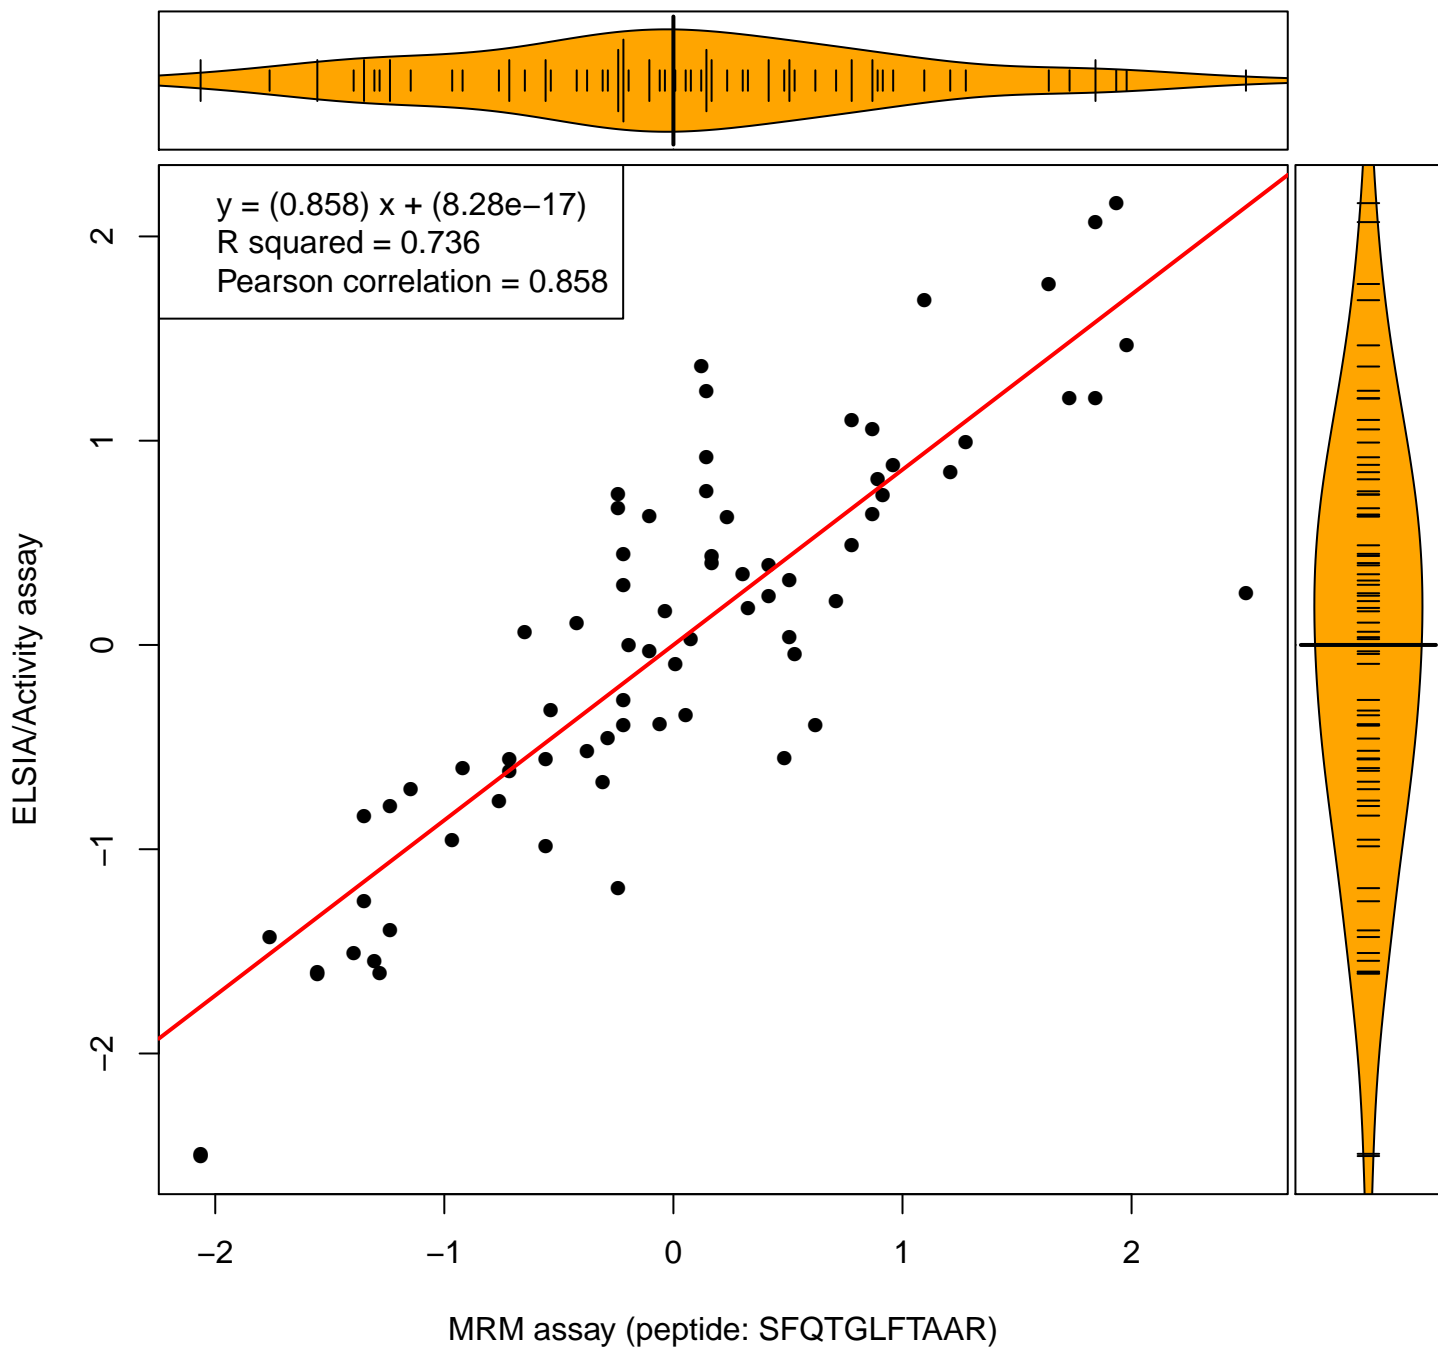

# Vitamin K-dependent protein S, P07225

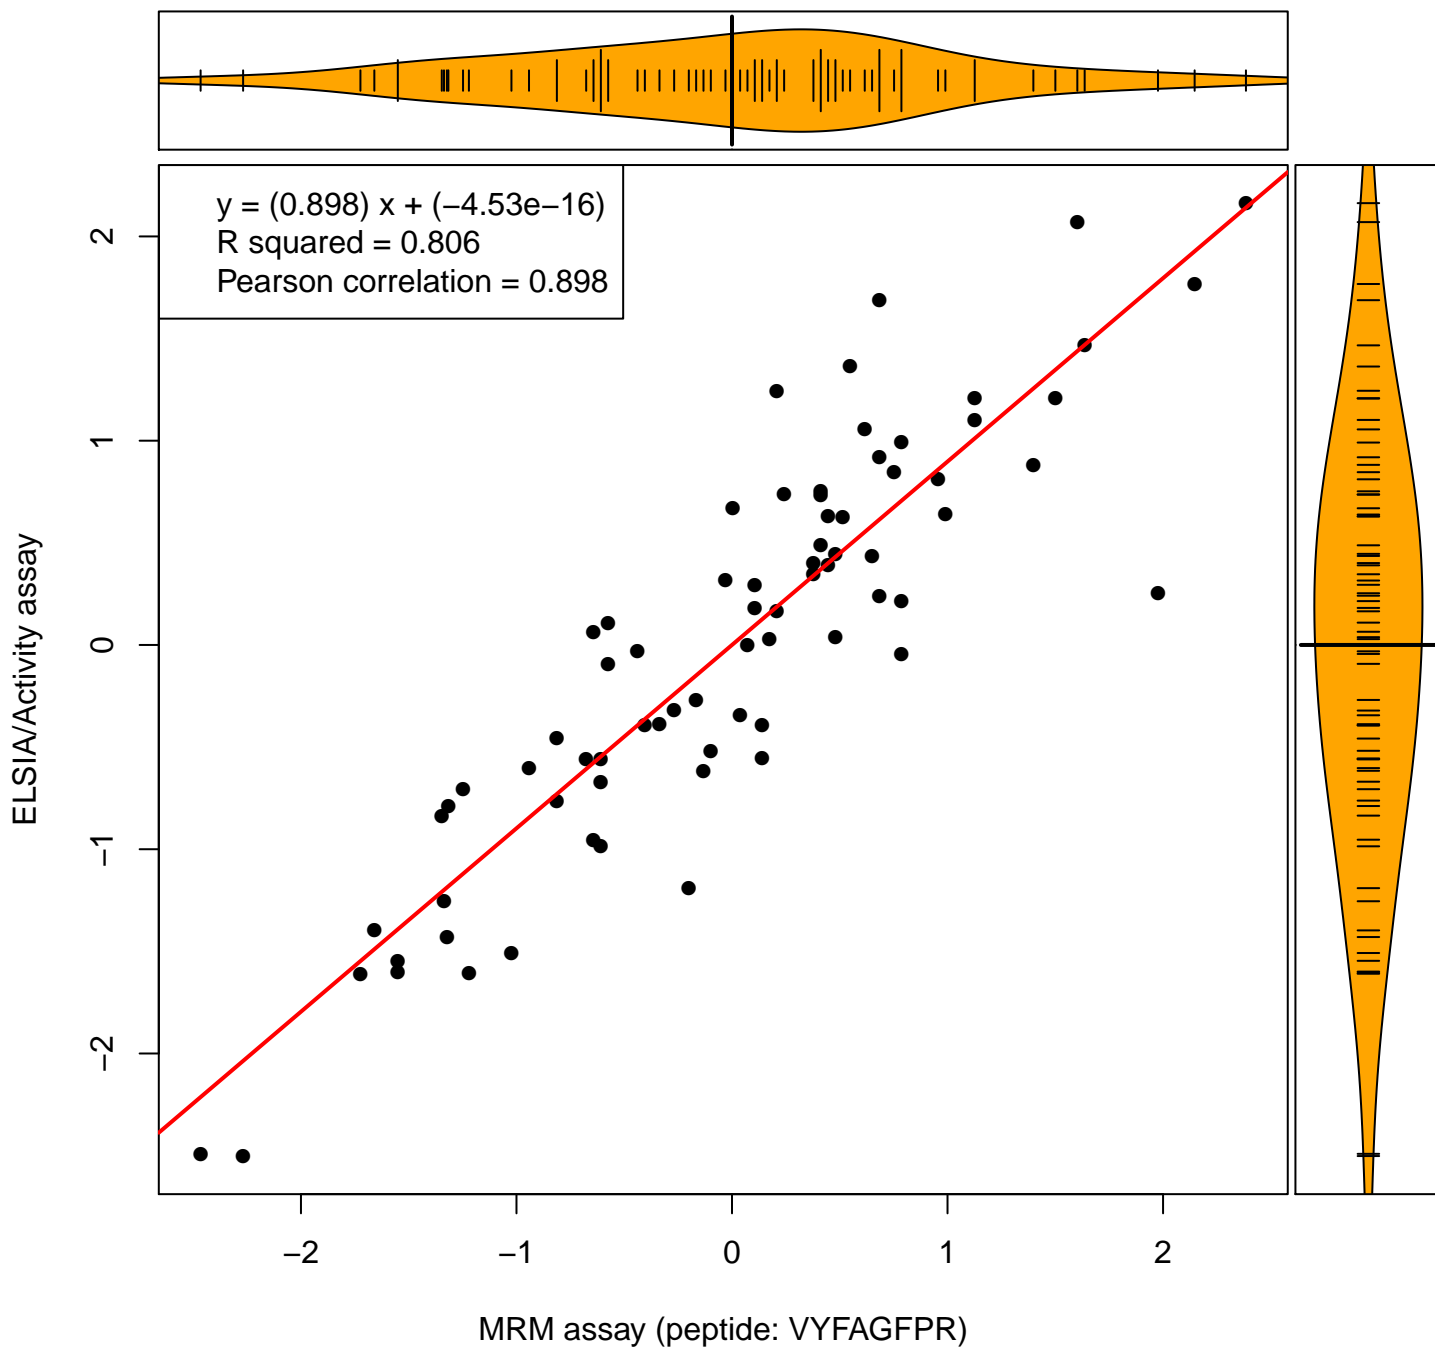



# Plasminogen, P00747

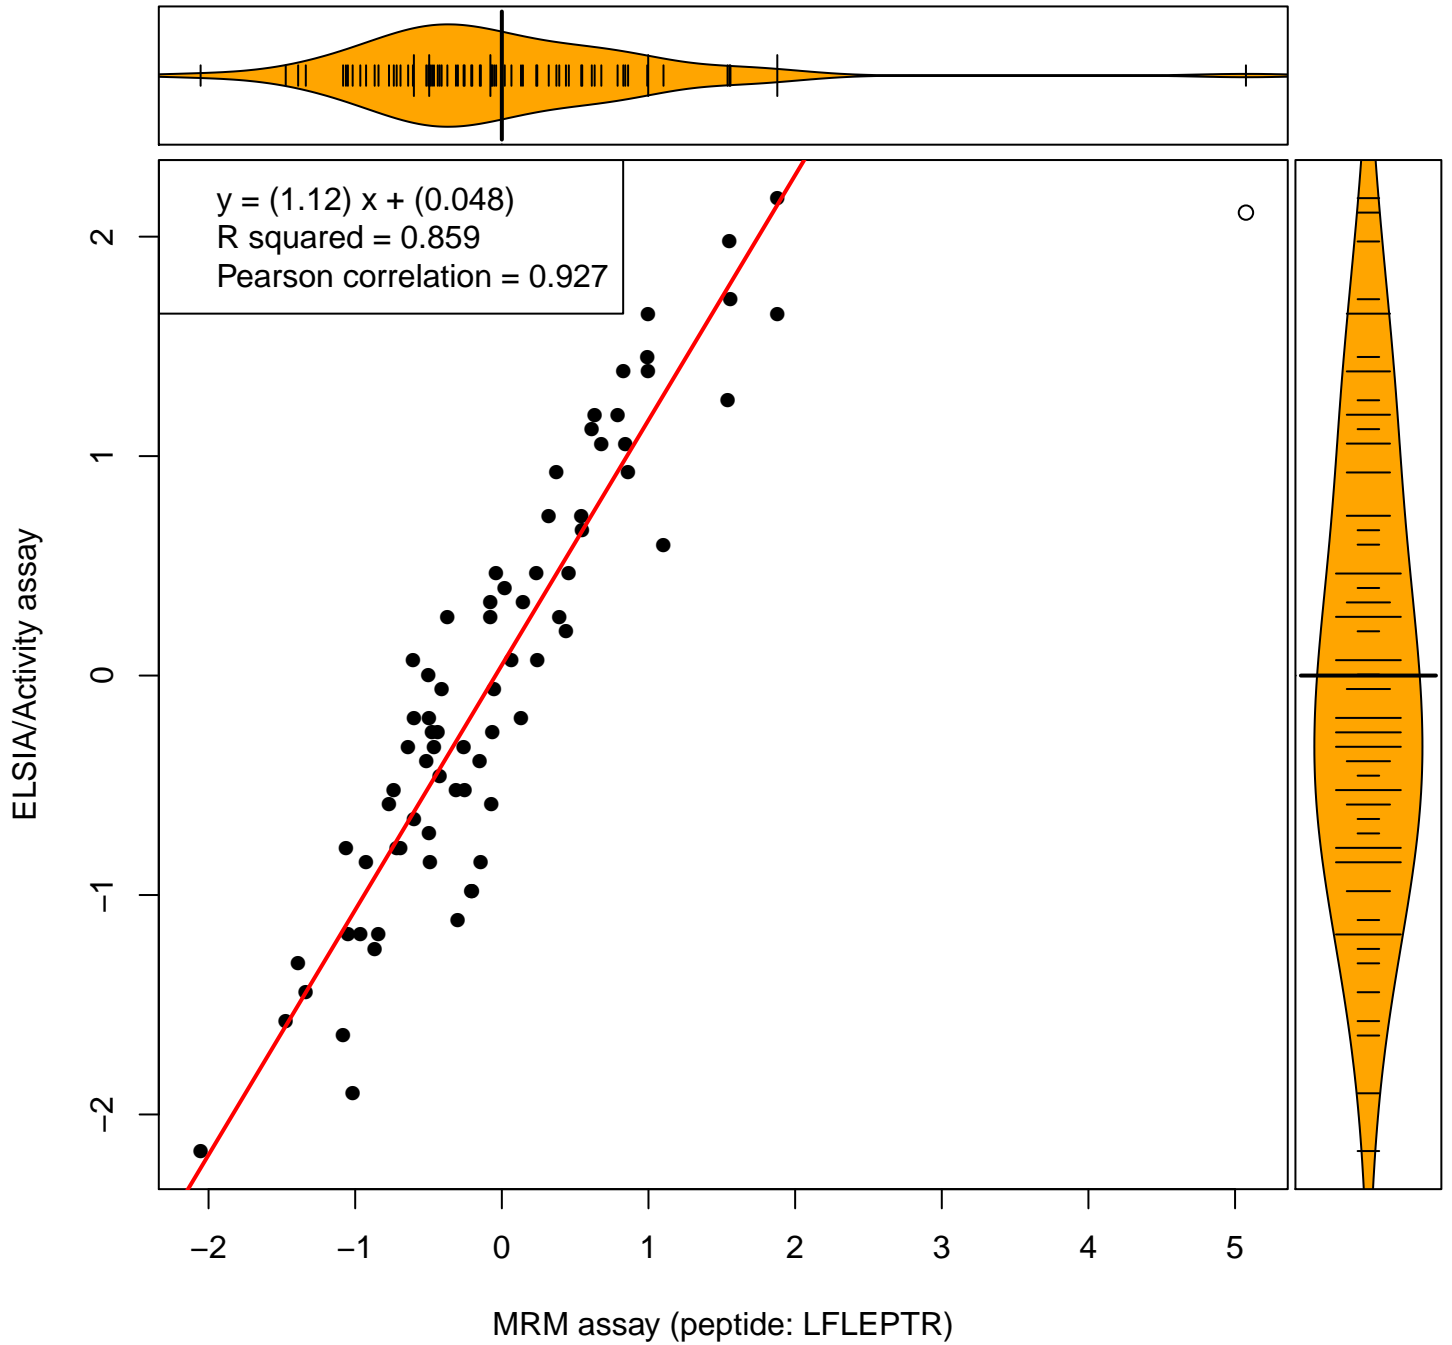

# Alpha-2-antiplasmin, P08697

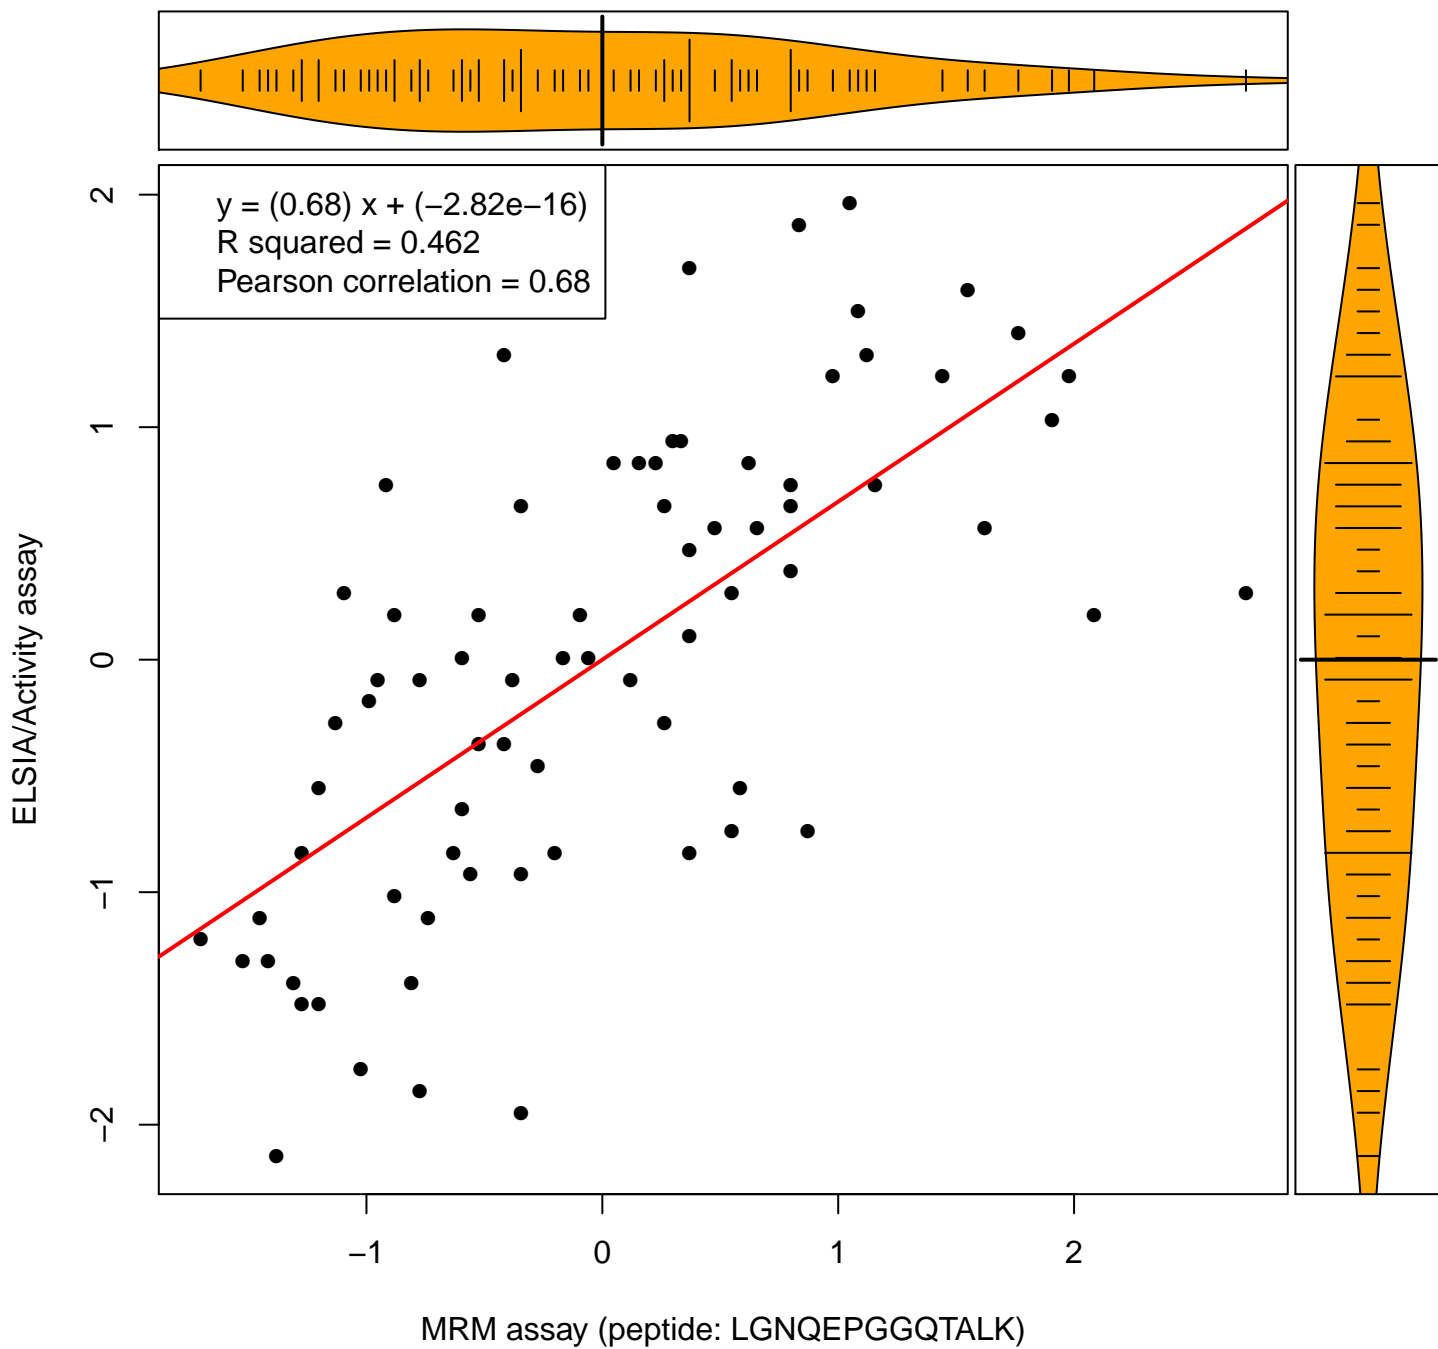

# Alpha-2-antiplasmin, P08697

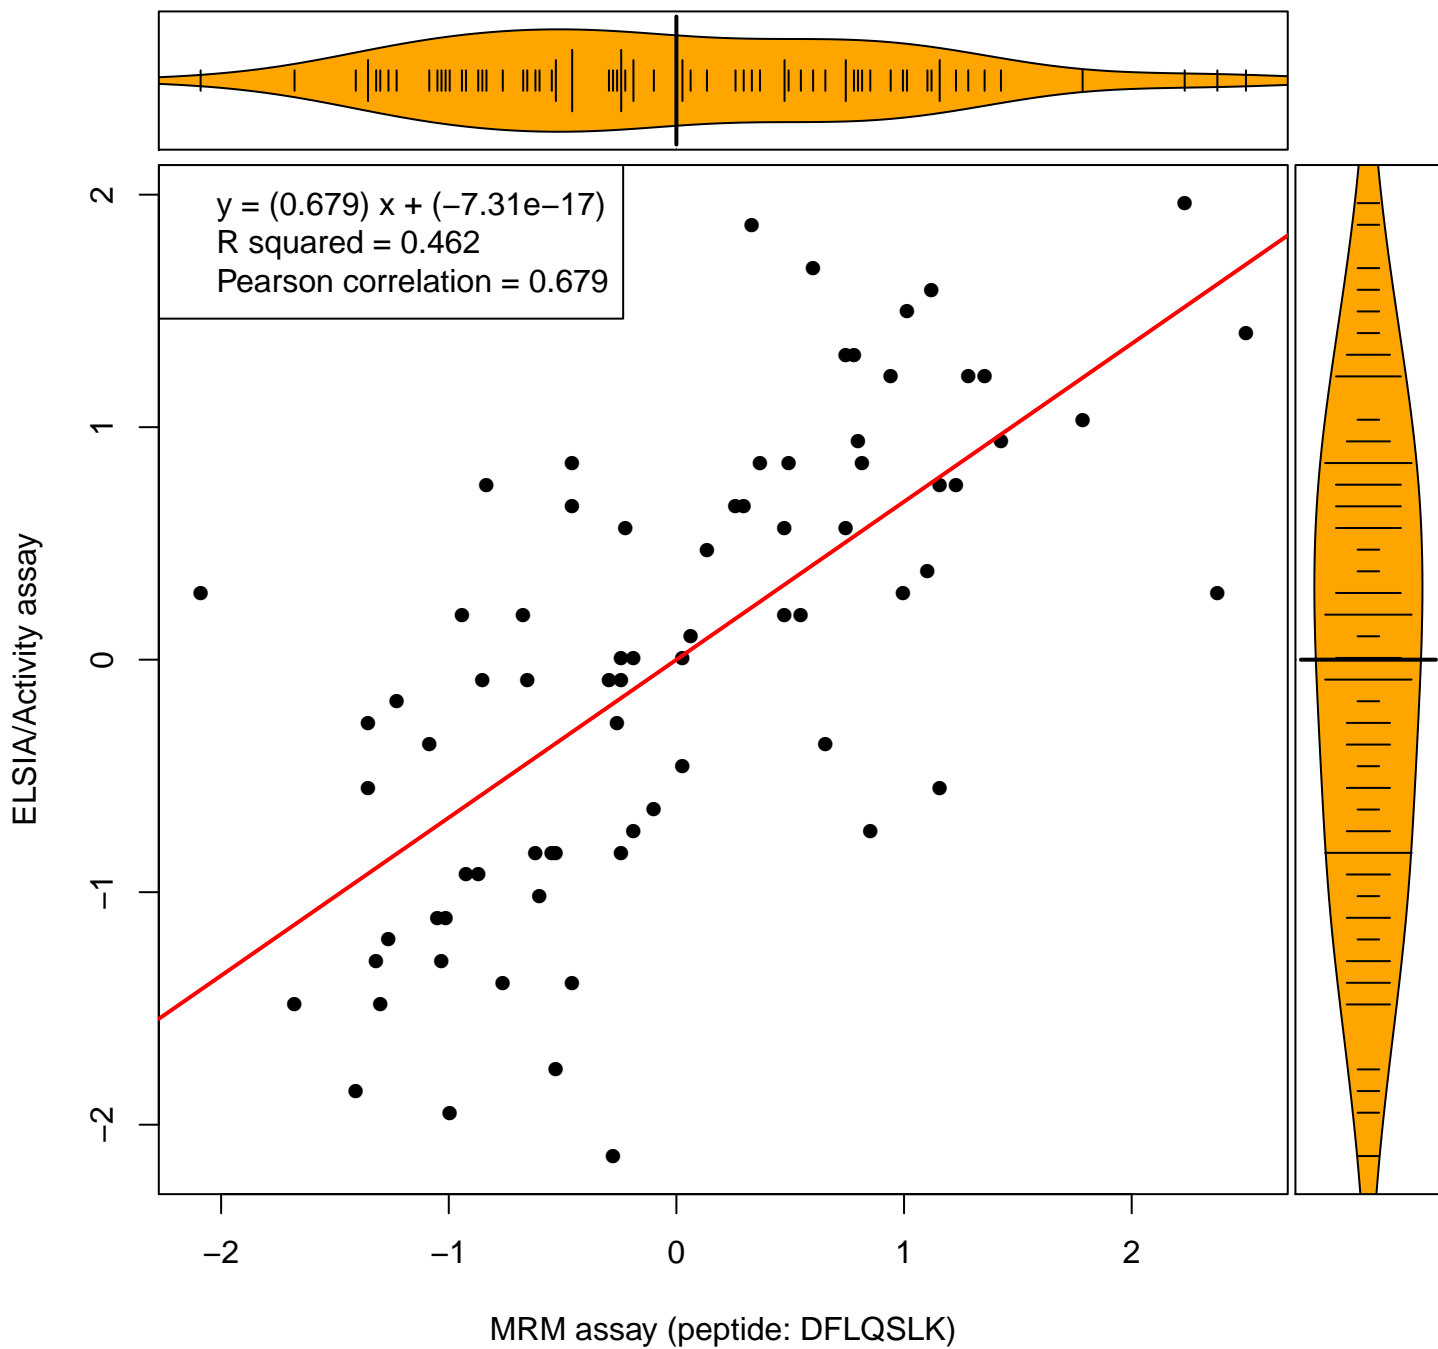

Supplement: ba007955-suppl1.pdf [file ba007955-suppl1.pdf]
